# Supplementary material for: Bird-Window Collisions at a West-Coast Urban Park Museum: Analyses of Bird Biology and Window Attributes from Golden Gate Park, San Francisco
Source: PLoS One. 2016 Jan 5;11(1):e0144600. doi: 10.1371/journal.pone.0144600 (PMC4701451; doi:10.1371/journal.pone.0144600)
Supplement: S1 Data — (XLSX) [file pone.0144600.s001.xlsx]

## Sheet: main datasheet--NO NEW ANALYSES
Date	Year	month	Season	time of survey	Mortality	# birds	Scientific name	genus	species	sex	age	Side	location	Collector/ Surveyor	disposition/ remarks	CAS #	Prep #	sex determined at prep	age determined at prep		Notes
2008-02-10	2008	2	winter		dead	1	Turdus migratorius	Turdus	migratorius			east	east entrance			96018	NM001	M	A	skeleton	added by EJC using NM prep notebook; acc. # not windowkill but data matches CAS
2008-03-12	2008	3	spring		dead	1	Zonotrichia atricapilla	Zonotrichia	atricapilla			east	eastside	unknown		97344	JMR965	M	HY		added by EJC using JMR prep notebook;no date originally but collection date found in accession file, aged by plumage 8/8/2014; 9/16/13--addendum--age corrected to AHY due to season. DEJU is the only passerine to concievably nest this early; this bird was presumably an immature rather than a juvenile
2008-03-31	2008	3	spring		Dead	1	Selasphorus sasin	Selasphorus	sasin			B2	southeast doors			96625	LCW276	F	A	pickle	added in using LCW's catalog; SY
2008-03-31	2008	3	spring		Dead	1	Selasphorus sasin	Selasphorus	sasin			B2	southeast doors			96626	LCW277	M	A	pickle; corr. ~20%; thin outer rects with white tips; obvious notch on r2	added in using LCW's catalog; SY
2008-04-07	2008	4	spring		Dead	1	Selasphorus sasin	Selasphorus	sasin			north				96616	LCW264	M	A	pickle	added in using LCW's catalog; SY
2008-04-09	2008	4	spring		Dead	1	Calypte anna	Calypte	anna			east	eastside			97095	PLG751	F	HY		added in using PLG's catalog; aged 8/12/2014
2008-04-09	2008	4	spring		Dead	1	Calypte anna	Calypte	anna			east	eastside			97096	PLG752	M	A		added in using PLG's catalog
2008-04-21	2008	4	spring		Dead	1	Calypte anna	Calypte	anna			east	eastside			96677	CCO145	U	U	pickle	added in using CCO's catalog
2008-04-21	2008	4	spring		Dead	1	Calypte anna	Calypte	anna			east	eastside			96928	PLG781	M	A		added by EJC using online catalog & PLG's notebook
2008-05-05	2008	5	spring		Dead	1	Selasphorus sasin	Selasphorus	sasin			east	eastside			97094	PLG750	M	HY		added in using PLG's catalog
2008-05-08	2008	5	spring	900		0
2008-05-09	2008	5	spring	930		0
2008-05-12	2008	5	spring	830	Dead	1	Calypte anna	Calypte	anna	F	HY?	west	westside			96678	CCO146	U	U	pickle
2008-05-12	2008	5	spring	830	Dead	1	Calypte anna	Calypte	anna			east	eastside			96617	LCW265	M	A
2008-05-12	2008	5	spring	830	Dead	1	Calypte anna	Calypte	anna	F	U	east	eastside			97093	PLG749	F	A		Aged 8/12/2014
2008-05-12	2008	5	spring	830	Dead	1	Calypte anna	Calypte	anna			north	northside			not cataloged	PLG873	M	A
2008-05-23	2008	5	spring	1500		0
2008-05-28	2008	5	spring	1400		0
2008-05-29	2008	5	spring	1300		0
2008-06-13	2008	6	summer	1902-10-26	Dead	1	Junco hyemalis	Junco	hyemalis	?	HY	east	eastside			97099	PLG603	M	HY
2008-06-18	2008	6	summer	1730	Dead	1	Calypte anna	Calypte	anna	Male	HY	east	eastside			97092	PLG746	F	HY		prep/age/sex added 8/7/2014
2008-07-02	2008	7	summer	1115	Dead	1	Selasphorus sasin	Selasphorus	sasin	male	HY	east	eastside			96615	LCW263	F	HY	pickle; corr 70%; medium-width outer rec with white tip; r1 rufous with green tip
2008-07-03	2008	7	summer					woodpecker reported hitting westside, could not find carcass
2008-07-06	2008	7	summer		Dead	1	Selasphorus sasin	Selasphorus	sasin	F?	HY	east	eastside			96618	LCW266	M	HY	pickle; short bill; corr. 75%; very thin outer rect with white tip
2008-07-10	2008	7	summer			0
2008-07-11	2008	7	summer			0
2008-07-13	2008	7	summer		Dead	1	Melospiza melodia	Melospiza	melodia			???	ask Alex			97341	MEF535	F	HY	age/sex data entered from prep notes 8/8/2014
2008-07-14	2008	7	summer		Dead	1	Calypte anna	Calypte	anna			Staff entrance	southside			96627	LCW278	M	A	pickle; irridescent feathers on throat and forehead
2008-07-15	2008	7	summer		Dead	1	Selasphorus sasin	Selasphorus	sasin	Male	HY	west	westside			96620	LCW268	M	HY	pickle; short bill; corr. 25%; very thin outer rect with white tip
2008-07-22	2008	7	summer		Dead	1	Selasphorus sasin	Selasphorus	sasin	U	U	west	westside			96629	LCW280	M	HY	pickle; short bill; corr. 30%; very thin outer rec with white tip
2008-07-23	2008	7	summer		Alive	1	Hummingbird sp.					???									hummingbird reported staggering on ground at north entrance - no carcass found
2008-07-24	2008	7	summer		Dead	1	Calypte anna	Calypte	anna			Staff entrance	southside			96932	PLG793	M	HY		Added according to PLG's catalog; potentially the same bird as the other Calypte anna from this date, which was entered as alive, but all other information matches this bird
2008-07-24	2008	7	summer		alive	1	Calypte anna	Calypte	anna	Male	HY	unknown - B2 or staff entrance	southside								potentially the same bird as the other Calypte anna from this date
2008-07-31	2008	7	summer		Dead	1	Calypte anna	Calypte	anna	Male	HY	???				96630	LCW281	M	HY
2008-07-31	2008	7	summer		alive	1	Calypte anna	Calypte	anna	Male	HY	???	ask Fernando
2008-08-08	2008	8	summer		Dead	1	Junco hyemalis	Junco	hyemalis	U	HY	east	eastside			97098	PLG602	M	HY
2008-08-20	2008	8	summer			0															COME BACK TO THESE TO FIGURE OUT THE PROBLEM: NO SPECIES LISTED, BUT INDICATED AS ALIVE
2008-08-22	2008	8	summer			0
2008-08-25	2008	8	summer		Dead	1	Calypte anna	Calypte	anna	Male	HY	Staff entrance	southside			96931	PLG792	M	HY		Added according to PLG's catalog
2008-08-26	2008	8	summer		Dead	1	Calypte anna	Calypte	anna			Staff entrance	southside			96631	LCW282	U	U
2008-08-29	2008	8	summer			0
2008-08-30	2008	8	summer		Dead	1	Calypte anna	Calypte	anna	female	HY	east	eastside
2008-08-31	2008	8	summer		Dead	1	Selasphorus rufus	Selasphorus	rufus	male	HY	north	northside			96930	PLG789	M	HY		initially identified in spreadshhet as Selasphorus sasin, but Peter's notebook says Selasphorus rufus; check collection
2008-09-01	2008	9	fall		Dead	1	Calypte anna	Calypte	anna	Male	HY	west	westside			not cataloged	JMR1012	M	HY
2008-09-02	2008	9	fall		Dead	1	Calypte anna	Calypte	anna	male	HY	west	westside			96621	LCW269	M	HY
2008-09-02	2008	9	fall		Dead	1	Selasphorus rufus	Selasphorus	rufus	female	HY	east	eastside			96927	PLG748	F	HY		Aged 8/12/2014
2008-09-04	2008	9	fall	915	Dead	1	Junco hyemalis	Junco	hyemalis	unknown	HY	east	eastside			not cataloged	MK1069	M	HY		Added according to MK's prep notes, age data entered 8/7/2014
2008-09-04	2008	9	fall	1225	Alive	1	Calypte anna	Calypte	anna	female	HY	east	eastside
2008-09-05	2008	9	fall		Dead	1	Selasphorus rufus	Selasphorus	rufus		HY	east	eastside			96619	LCW267	F	HY	pickle; corr. 15%; outer rec medium width; r1 green at tip with rufous base
2008-09-08	2008	9	fall			0
2008-09-09	2008	9	fall			0
2008-09-18	2008	9	fall			0
2008-09-22	2008	9	fall			0
2008-09-28	2008	9	fall			0
2008-09-29	2008	9	fall		Dead	1	Vermivora celata	Vermivora	celata			???				96628	LCW279	F	U	pickle; tail 43.9 mm; orange on crown 5.5mm
2008-10-08	2008	10	fall		Dead	1	Passerella iliaca	Passerella	iliaca		HY	west	westside			97152	ASG065	F	U
2008-10-08	2008	10	fall		Dead	1	Catharus guttatus	Catharus	guttatus		HY	east	eastside			97146	ASG066	F	U
2008-10-11	2008	10	fall		Dead	1	Passerculus sandwichensis	Passerculus	sandwichensis		HY	west	westside			not cataloged	MK1061	M	HY	25% oss
2008-10-12	2008	10	fall		Dead	1	Geothlypis trichas	Geothlypis	trichas		HY	east	eastside			not cataloged	MK1060	F	HY	25% oss
2008-10-13	2008	10	fall		Dead	1	Passerculus sandwichensis	Passerculus	sandwichensis		HY	north	front side			97100	PLG604	M	U
2008-10-14	2008	10	fall	1700	Dead	1	Euphagus cyanocephalus	Euphagus	cyanocephalus			wet	westside			not cataloged	CCO004	F	A		added by EJC using CCO prep notebook
2008-10-14	2008	10	fall	1700	Dead	1	Euphagus cyanocephalus	Euphagus	cyanocephalus			west	westside			not cataloged	KJO004	F	U
2008-10-14	2008	10	fall	1700	Dead	1	Euphagus cyanocephalus	Euphagus	cyanocephalus			west	westside			not cataloged	PJY004	M	HY
2008-10-14	2008	10	fall	1700	Dead	1	Euphagus cyanocephalus	Euphagus	cyanocephalus			west	westside			not cataloged	RJH004	M	HY
2008-10-14	2008	10	fall	800		0
2008-10-14	2008	10	fall		Alive	1	Calypte anna	Calypte	anna			north	northside
2008-10-15	2008	10	fall		Dead	1	Setophaga townsendi	Setophaga	townsendi		HY	B2	southside			not cataloged	MK1106	U	U
2008-10-22	2008	10	fall		Dead	1	Passerella iliaca	Passerella	iliaca			north	frontside	Jay (guest services)		not cataloged	MK1071	F	U
2008-10-23	2008	10	fall		Dead	1	Calypte anna	Calypte	anna			???	no data with specimen, found on my desk 10/24 (I was out 10/23)			97090	PLG741	F	A		Aged 8/12/2014
2008-10-25	2008	10	fall		dead	1	Calypte anna	Calypte	anna			east	east garden	N. Perez		not cataloged	IGK009	M	A		added by EJC using IGK prep notebook
2008-10-25	2008	10	fall		Dead	1	Junco hyemalis	Junco	hyemalis		HY	west	westside			97097	PLG601	U	HY
2008-10-25	2008	10	fall		Dead	1	Calypte anna	Calypte	anna			west	west			97105	PLG610	M	A		Aged and sexed 8/12/2014
2008-11-03	2008	11	fall		Alive	1	Calypte anna	Calypte	anna			east	hit eastside garden, escaped in Botany dept., Bob Drewes released
2008-11-04	2008	11	fall		Dead	1	Calypte anna	Calypte	anna	male		Staff entrance	southside			96929	PLG782	M	A
2008-11-04	2008	11	fall		Alive	1	Calypte anna	Calypte	anna			???	guards let it go
2008-11-18	2008	11	fall		Dead	1	Catharus guttatus	Catharus	guttatus			Staff entrance	south door			not cataloged	MK1072	M	U		added by EJC using MK prep notebook; not window kill acc. # but location is CAS window kill, 498 tray 8
2008-11-20	2008	11	fall									west	Cathy Choi reported a dead bird in the west garden, O&M was at Research retreat so we did not respond, not sure if same bird as 11/21
2008-11-21	2008	11	fall		Dead	1	Calypte anna	Calypte	anna	male		west	westside			96926	PLG608	M	A
2009-01-04	2009	1	winter		Dead	1	Calypte anna	Calypte	anna			???		MEF		97128	PLG775	M	A
2009-01-04	2009	1	winter		Dead	1	Calypte anna	Calypte	anna			???		MEF		96914	PLG776	M	A
2009-01-07	2009	1	winter		Dead	1	Calypte anna	Calypte	anna	M	AD	east	east garden	reported to guards		97126	PLG772	M	A
2009-01-16	2009	1	winter		Dead	1	Calypte anna	Calypte	anna	west	westside	west	westside	Alex Yow		not cataloged	IGK015	M	A		EJC listed as IGK013 and IGK016; MEF corrected based on Accession file 8/7/14, added west side as location
2009-01-16	2009	1	winter		Dead	1	Calypte anna	Calypte	anna	M	AD	west	westside	Alex Yow		not cataloged	IGK016	M	A		EJC listed as IGK013 and IGK016; MEF corrected based on Accession file 8/7/14
2009-01-30	2009	1	winter		Dead	1	Calypte anna	Calypte	anna	M	AD	east	eastside	Chuck Castorino		96915	PLG778	M	A
2009-01-30	2009	1	winter		Dead	1	Calypte anna	Calypte	anna	M	AD	east	eastside	Chuck Castorino		96916	PLG779	M	A
2009-02-23	2009	2	winter		Dead	1	Calypte anna	Calypte	anna	F?	AD?	east	east garden	Gerber Ramirez		97132	ASG121	F	A
2009-03-02	2009	3	spring		Dead	1	Calypte anna	Calypte	anna	M	AD	east	eastside	Eric		97000	PLG766	M	A
2009-03-03	2009	3	spring	830		0
2009-03-11	2009	3	spring	820		0
2009-03-12	2009	3	spring	735		0
2009-03-13	2009	3	spring	930		0								PLG
2009-03-14	2009	3	spring	915		0								PLG
2009-03-15	2009	3	spring	900		0								PLG
2009-03-16	2009	3	spring	930		0								ASG
2009-03-17	2009	3	spring	930		0								ASG
2009-03-18	2009	3	spring	840		0								PLG
2009-03-19	2009	3	spring	840		0								PLG
2009-03-20	2009	3	spring	920		0								PLG
2009-03-21	2009	3	spring	910		0								PLG
2009-03-22	2009	3	spring	920		0								PLG
2009-03-24	2009	3	spring	820		0								MEF - double effort today
2009-03-24	2009	3	spring	930		0								ASG - double effort today
2009-03-25	2009	3	spring	830		0								PLG
2009-03-26	2009	3	spring	950	Dead	1	Junco hyemalis	Junco	hyemalis	F	AD	north	northside	Education dept.			IGK019	F	A		prep umber entered 8/7/2014; check for specimen to age/sex
2009-03-26	2009	3	spring	925		0								PLG
2009-03-28	2009	3	spring	930		0								PLG
2009-03-29	2009	3	spring	830		0								PLG
2009-03-30	2009	3	spring	915		0								MEF
2009-03-31	2009	3	spring	830		0								MEF
2009-04-01	2009	4	spring	1400	Dead	1	Calypte anna	Calypte	anna	M	AD	east	eastside	Joanna Yu		96995	PLG758	M	A		Aged 8/12/2014
2009-04-01	2009	4	spring	1400	Dead	1	Calypte anna	Calypte	anna	M	AD	east	eastside	Joanna Yu		96996	PLG759	M	A		Aged 8/12/2014
2009-04-01	2009	4	spring	840		0								PLG
2009-04-02	2009	4	spring	940		0								PLG
2009-04-03	2009	4	spring	850		0								PLG
2009-04-04	2009	4	spring	815		0								MEF
2009-04-05	2009	4	spring	1818	Dead	1	Selasphorus rufus	Selasphorus	rufus	F		west	west garden	Robby Maccam - security	skin 8/12/09 PLG 780	96924	PLG780	F	A		found on Moe's desk at 1818. Exact time unknown, aged 8/12/2014
2009-04-05	2009	4	spring	900		0								PLG
2009-04-06	2009	4	spring	700	Dead	1	Selasphorus sasin	Selasphorus	sasin	M	AD	north	frontside (northside)	Javier Perez		96922	PLG675	M	A
2009-04-06	2009	4	spring	900		0								MEF
2009-04-07	2009	4	spring	830		0								MEF
2009-04-08	2009	4	spring	840		0								PLG
2009-04-09	2009	4	spring	850		0								PLG
2009-04-12	2009	4	spring	930		0								PLG
2009-04-13	2009	4	spring	915		0								MEF
2009-04-13	2009	4	spring	1430	Alive	1	Selasphorus sasin	Selasphorus	sasin	F	AD	east	east garden	Sherry - custodian							handed over to Freelend for glucose treatment, released successfully 2 hours later
2009-04-14	2009	4	spring	815		0								MEF
2009-04-15	2009	4	spring	835		0								PLG
2009-04-15	2009	4	spring	1530	Alive	1	Calypte anna	Calypte	anna			west	west garden	Security							released alive by guards
2009-04-16	2009	4	spring	1740	Dead	1	Calypte anna	Calypte	anna	U	JUV	Staff entrance	southside	Beth Goldstein		97127	PLG774	F	A		Aged 8/12/2014
2009-04-16	2009	4	spring	900		0								PLG
2009-04-17	2009	4	spring	745		0								MEF
2009-04-18	2009	4	spring	645		0								MEF
2009-04-19	2009	4	spring	1340	Dead	1	Calypte anna	Calypte	anna	F	AD	east	east terrace	Joseph - security		not cataloged	JMR1014	M	U		found on Moe's desk at 1340. Exact time unknown.
2009-04-19	2009	4	spring	1015		0								PLG
2009-04-19	2009	4	spring	late AM	Dead	1	Unknown	Unknown				north	frontside (northside)	custodians							"very small yellow bird" found by custodians and mistakenly thrown out
2009-04-20	2009	4	spring	815		0								MEF
2009-04-21	2009	4	spring	715		0								MEF
2009-04-21	2009	4	spring	1400	Alive	1		Hummingbird species unknown				north	northside	observed by Freeland - hit window and flew away on its own
2009-04-22	2009	4	spring	730		0								MEF
2009-04-23	2009	4	spring	730		0								MEF
2009-04-25	2009	4	spring	915		0								PLG
2009-04-26	2009	4	spring	940		0								PLG
2009-04-27	2009	4	spring	730		0								MEF
2009-04-28	2009	4	spring	1200	Dead	1	Calypte anna	Calypte	anna	F	U	west	west garden	Sean Reddix & Karis Zaldivar		96999	PLG763	F	HY		Aged 8/12/2014
2009-04-28	2009	4	spring	745		0								MEF
2009-04-29	2009	4	spring	1200	Dead	1	Calypte anna	Calypte	anna	M / U	A / HY	west	west garden	Sean Reddix & Karis Zaldivar		97001	PLG768	M	A		Aged 8/12/2014
2009-04-29	2009	4	spring	745		0								MEF
2009-04-29	2009	4	spring	845		0								PLG
2009-04-30	2009	4	spring	900		0								PLG
2009-05-02	2009	5	spring	915		0								PLG
2009-05-03	2009	5	spring	940		0								PLG
2009-05-04	2009	5	spring	845		0								MEF
2009-05-05	2009	5	spring	745		0								MEF
2009-05-06	2009	5	spring	1030	Dead	1	Cardellina pusilla	Cardellina	pusilla	M	AHY	B2	southside	Brian Fisher		not cataloged	MK1082	M	A
2009-05-06	2009	5	spring	1115	Dead	1	Calypte anna	Calypte	anna	M	HY	west	westside	Cafe staff		96994	PLG757	M	HY		Aged 8/12/2014
2009-05-06	2009	5	spring	745		0								MEF
2009-05-07	2009	5	spring	930		0								PLG
2009-05-08	2009	5	spring	800		0								MEF
2009-05-09	2009	5	spring	1700	Dead	1	Calypte anna	Calypte	anna	F		east	east garden	Security		96624	LCW275	M	HY	pickle; corr 70%; outer primary thin and curved	apparently stepped on and in bad condition
2009-05-09	2009	5	spring	935		0								PLG
2009-05-10	2009	5	spring	1115		0								PLG
2009-05-10	2009	5	spring	1530	Alive	1	Selasphorus sasin	Selasphorus	sasin	F	AHY	north	frontside (northside)	Larry							flew off after ~90 min, however obvious injury to left eye and subdermal haematoma causing noticable bulge
2009-05-11	2009	5	spring	1745	Dead	1	Junco hyemalis	Junco	hyemalis	U	HY	B2	southside office windows	MEF	skin 5/29/09 JMR	not cataloged	JMR991	M	HY	10% oss
2009-05-11	2009	5	spring	745		0								MEF
2009-05-12	2009	5	spring	730		0								MEF
2009-05-13	2009	5	spring	745		0								MEF
2009-05-13	2009	5	spring	845		0								PLG
2009-05-14	2009	5	spring	920		0								PLG
2009-05-15	2009	5	spring	800		0								MEF
2009-05-16	2009	5	spring	840		0								PLG
2009-05-17	2009	5	spring	715		0								PLG
2009-05-18	2009	5	spring	815		0								MEF
2009-05-18	2009	5	spring	845		0								MEF
2009-05-20	2009	5	spring	845		0								PLG
2009-05-21	2009	5	spring	645		0								MEF							Moe spoke with the nightguards this morning at 6:45am - they did not know what to do with dead birds but also have not seen any. Now they know the procedures.
2009-05-21	2009	5	spring	845		0								PLG
2009-05-23	2009	5	spring	845		0								PLG
2009-05-24	2009	5	spring	930		0								PLG
2009-05-25	2009	5	spring	1000	Dead	1	Calypte anna	Calypte	anna	U	HY	north	frontside (northside)	Nance Perkins		not cataloged	JMR1015	F	U
2009-05-25	2009	5	spring	730		0								MEF
2009-05-25	2009	5	spring	1000	Alive	1	Calypte anna	Calypte	anna			north	frontside (northside)	Security released
2009-05-26	2009	5	spring	815		0								MEF
2009-05-27	2009	5	spring	1000	Dead	1	Melospiza melodia	Melospiza	melodia	U	HY	east	east garden	custodians	skin 5/29/09 JMR	not cataloged	JMR992	M	HY	10% oss
2009-05-27	2009	5	spring	815		0								MEF
2009-05-28	2009	5	spring	845		0								PLG
2009-05-30	2009	5	spring	900		0								PLG
2009-05-31	2009	5	spring	900		0								PLG
2009-06-02	2009	6	summer	815		0								MEF
2009-06-03	2009	6	summer	1030	Dead	1	Selasphorus sasin	Selasphorus	sasin	F?	HY?	east	east garden	Estival		96992	PLG755	M	Hy		Aged 8/12/2014
2009-06-03	2009	6	summer	815		0								MEF
2009-06-03	2009	6	summer	840		0								PLG
2009-06-04	2009	6	summer	1600	Dead	1	Selasphorus sasin	Selasphorus	sasin	M?	HY?	east	east side	Security		97003	PLG770	M	HY		Aged 8/12/2014
2009-06-04	2009	6	summer	800		0								MEF
2009-06-05	2009	6	summer	815		0								MEF
2009-06-06	2009	6	summer	910		0								PLG
2009-06-07	2009	6	summer	900		0								PLG
2009-06-08	2009	6	summer	800		0								MEF
2009-06-09	2009	6	summer	800		0								MEF
2009-06-10	2009	6	summer	800		0								MEF
2009-06-10	2009	6	summer	840		0								PLG
2009-06-11	2009	6	summer	1600	Dead	1	Calypte anna	Calypte	anna	F?	HY	east	east garden	guest services		96623	LCW274	F	HY	pickle; corr. 80%; white tip on r5 pointing toward the black subterminal band centrally; outer primary reatively blunt and straight
2009-06-11	2009	6	summer	1300	Dead	1	Calypte anna	Calypte	anna	F?	HY	east	east garden	Eric Bollich		96993	PLG756	F	HY		Aged 8/12/2014
2009-06-11	2009	6	summer	630		0								MEF
2009-06-11	2009	6	summer	835		0								PLG
2009-06-12	2009	6	summer	715		0								MEF
2009-06-13	2009	6	summer	845		0								PLG
2009-06-13	2009	6	summer	915	Alive	1	Calypte anna	Calypte	anna	F	HY?	north	frontside (northside)	PLG							stunned. Kept warm and quiet. Flew off after 15min
2009-06-14	2009	6	summer	845		0								PLG
2009-06-15	2009	6	summer	915		0								MEF
2009-06-16	2009	6	summer	715		0								MEF
2009-06-17	2009	6	summer	715		0								MEF
2009-06-18	2009	6	summer	715		0								MEF
2009-06-19	2009	6	summer	1620	Dead	1	Euphagus cyanocephalus	Euphagus	cyanocephalus			east	east garden	K. Esqutria		not cataloged	MEY011	F	U
2009-06-19	2009	6	summer	715		0								MEF
2009-06-21	2009	6	summer	855		0								PLG
2009-06-22	2009	6	summer	1130	Dead	1	Calypte anna	Calypte	anna	M	HY?	north	frontside (northside)	custodian		97002	PLG769	M	HY		Aged 8/12/2014
2009-06-22	2009	6	summer	745		0								MEF
2009-06-23	2009	6	summer	815		0								MEF
2009-06-24	2009	6	summer	900		0								PLG
2009-06-24	2009	6	summer	1030	Alive	1	Euphagus cyanocephalus	Euphagus	cyanocephalus			north	northside	guest services reported a stunned, live Brewer's Blackbird. Bird recovered and flew off
2009-06-25	2009	6	summer	1400	Dead	1	Sturnus vulgaris	Sturnus	vulgaris	U	HY	west	west garden	Nance Perkins		97131	ASG116	F	HY
2009-06-25	2009	6	summer	850		0								PLG
2009-06-26	2009	6	summer	640		0								MEF
2009-06-26	2009	6	summer	915		0								PLG
2009-06-27	2009	6	summer	830		0								PLG
2009-06-27	2009	6	summer	1020	Alive	1	Euphagus cyanocephalus	Euphagus	cyanocephalus	F		north	northside	guest services Angela							stunned. Kept warm and quiet. Flew off after 15min
2009-06-28	2009	6	summer	855		0								PLG
2009-06-29	2009	6	summer	815		0								MEF
2009-06-30	2009	6	summer	815		0								MEF
2009-07-01	2009	7	summer	730		0								MEF
2009-07-01	2009	7	summer	840		0								PLG
2009-07-02	2009	7	summer	845		0								MEF
2009-07-04	2009	7	summer	1320	Dead	1	Euphagus cyanocephalus	Euphagus	cyanocephalus	F	HY	B2	southside office windows	PLG		not cataloged	PJY019	M	HY
2009-07-04	2009	7	summer		Dead	1	Euphagus cyanocephalus	Euphagus	cyanocephalus	F	AHY	west	west garden	C. Kang security		not cataloged	RJH019	U	U
2009-07-04	2009	7	summer	900		0								PLG
2009-07-05	2009	7	summer	845		0								PLG
2009-07-06	2009	7	summer		Dead	1	Euphagus cyanocephalus	Euphagus	cyanocephalus	F	AHY	east	east garden	Security		not cataloged	ASG117	M	HY
2009-07-06	2009	7	summer	1400	Dead	1	Euphagus cyanocephalus	Euphagus	cyanocephalus	U	JUV	west	west garden	Eric Bollich		not cataloged	LAS008	F	HY
2009-07-08	2009	7	summer	845	Dead	1	Junco hyemalis	Junco	hyemalis	U	JUV	west	westside	PLG	skin 7/29/09 MK	not cataloged	MK1088	F	HY
2009-07-09	2009	7	summer	905		0								PLG
2009-07-11	2009	7	summer	850		0								PLG
2009-07-12	2009	7	summer	850		0								PLG
2009-07-15	2009	7	summer	845		0								PLG
2009-07-16	2009	7	summer	910		0								PLG
2009-07-17	2009	7	summer	1130	Dead	1	Calypte anna	Calypte	anna	F	AHY	north	northside	guest services Angela	skin 7/19/09 PLG 753	97101	PLG753	M	HY		Aged 8/12/2014
2009-07-18	2009	7	summer	845		0								PLG
2009-07-19	2009	7	summer	<0900	Dead	1	Calypte anna	Calypte	anna	F	AHY	west	westside	CAS staff	skin 7/19/09 PLG 754	97102	PGL754	F	A		found in Moe's freezer 0900 already frozen, aged 8/12/2014
2009-07-19	2009	7	summer	PM	Dead	1	Calypte anna	Calypte	anna	M	HY	east	east garden	Reddix		96998	PLG762	M	HY		Aged 8/12/2014
2009-07-19	2009	7	summer	850		0								PLG
2009-07-20	2009	7	summer	920		0								ASG
2009-07-21	2009	7	summer	855		0								ASG
2009-07-21	2009	7	summer	2000	Alive	1	Zenaida macroura	Zenaida	macroura	U	HY	Staff entrance	south entrance	ASG	stunned but flew off
2009-07-22	2009	7	summer	905		0								ASG
2009-07-23	2009	7	summer	920		0								PLG
2009-07-25	2009	7	summer	900	Dead	1	Calypte anna	Calypte	anna	F	HY	east	east garden	PLG		96997	PLG760	M	HY		Aged 8/12/2014
2009-07-26	2009	7	summer	900		0								PLG
2009-07-27	2009	7	summer	715		0								MEF
2009-07-28	2009	7	summer	730		0								MEF
2009-07-29	2009	7	summer	630		0								MEF
2009-07-29	2009	7	summer	855		0								PLG
2009-07-30	2009	7	summer	615		0								MEF
2009-07-30	2009	7	summer	850		0								PLG
2009-07-31	2009	7	summer	715		0								MEF
2009-08-01	2009	8	summer	900		0								PLG
2009-08-02	2009	8	summer	910		0								PLG
2009-08-03	2009	8	summer	815		0								MEF
2009-08-04	2009	8	summer	840		0								MEF
2009-08-05	2009	8	summer	830	Dead	1	Calypte anna	Calypte	anna	M	HY	east	east garden	MEF		96913	PLG771	M	HY		Aged 8/12/2014
2009-08-06	2009	8	summer		Dead	1	Selasphorus sasin	Selasphorus	sasin	U	HY	east	east garden	security	skin 8/8/09 PLG	96923	PLG773	M	HY	added in using PLG's catalog	Aged 8/12/2014
2009-08-06	2009	8	summer	before 1045	Dead	1	Vireo gilvus	Vireo	gilvus	U	HY	east	east garden	security	skin 8/8/09 PLG	96911	PLG777	M	HY
2009-08-06	2009	8	summer	815		0								MEF
2009-08-08	2009	8	summer	800		0								PLG
2009-08-09	2009	8	summer	915		0								PLG
2009-08-10	2009	8	summer	1600	Dead	1	Calypte anna	Calypte	anna	M	HY	east	east garden	Alfredo Terrazas	skin 8/13/09 PLG 783	96917	PLG783	M	HY
2009-08-10	2009	8	summer	830		0								MEF
2009-08-11	2009	8	summer	730		0								MEF
2009-08-12	2009	8	summer	815		0								MEF
2009-08-13	2009	8	summer	800		0								MEF
2009-08-14	2009	8	summer		dead	1	Calypte anna	Calypte	anna			???		Kyle (CAS security)		not cataloged	ASG230	M	HY	added by EJC using ASG catalog
2009-08-14	2009	8	summer	730		0								MEF
2009-08-15	2009	8	summer	745		0								PLG
2009-08-16	2009	8	summer	1300	Dead	1	Calypte anna	Calypte	anna	F	HY	east	east garden	security		97133	ASG124	F	HY
2009-08-16	2009	8	summer	900		0								PLG
2009-08-17	2009	8	summer	800		0								MEF
2009-08-18	2009	8	summer	800		0								MEF
2009-08-19	2009	8	summer	815		0								MEF
2009-08-20	2009	8	summer	750		0								PLG
2009-08-21	2009	8	summer	815		0								MEF
2009-08-21	2009	8	summer	1100	Alive	1	Calypte anna	Calypte	anna	U	U	north	frontside (northside)	security - Reddix	appeared deceased - revived when collected and flew off
2009-08-22	2009	8	summer	750		0								PLG
2009-08-23	2009	8	summer	1400	Dead	1	Calypte anna	Calypte	anna	M	HY	east	east garden	PLG		not cataloged	PLG847	M	U
2009-08-23	2009	8	summer	850		0								PLG
2009-08-24	2009	8	summer	815		0								MEF
2009-08-25	2009	8	summer	1600	Dead	1	Euphagus cyanocephalus	Euphagus	cyanocephalus	F	HY	west	west garden	Jose - Security		not cataloged	LAS009	F	HY
2009-08-25	2009	8	summer	1700	Dead	1	Calypte anna	Calypte	anna	M	HY	east	east garden	Security		96918	PLG791	F	a		date corrected on 8/7/2014 changed from 8/29 to 8/25, aged 8/12/2014
2009-08-25	2009	8	summer	800		0								MEF
2009-08-26	2009	8	summer	800		0								MEF
2009-08-26	2009	8	summer	900		0								PLG
2009-08-29	2009	8	summer	1600	Dead	1	Calypte anna	Calypte	anna	F	HY	east	east garden	K. Zaldivar	skin 9/17/09 PLG 791	96921	PLG803	M	HY
2009-08-29	2009	8	summer	750		0								PLG
2009-08-29	2009	8	summer	1700	Alive	1	Calypte anna	Calypte	anna	M	HY	east	east garden	Security							Stunned and slight bleeding from mouth. Kept warm and quiet. 1800 : alert but unable to fly. No fractures apparent, may have muscle strain of R wing. Fed .25 ml sugar water 1:4. 8/30 0900: Fed .4 ml sugar water. Still unable to fly (only ~6m before bounce) but much better than yesterday.
2009-08-30	2009	8	summer	850		0								PLG
2009-08-31	2009	8	summer	815		0								MEF
2009-09-01	2009	9	fall	800	dead	1	Calypte anna	Calypte	anna	M	U	west	west garden	C. Kang security		96919	PLG795	M	HY		added using online catalog & PLG prep notebook, aged 8/12/2014
2009-09-02	2009	9	fall	1030	Dead	1	Carduelis psaltria	Carduelis	psaltria		HY	B2	southeast windows (B2E)	Engineers		96912	PLG794	F	HY		added using online catalog & PLG prep notebook
2009-09-02	2009	9	fall	900		0								PLG
2009-09-03	2009	9	fall	900	Alive	1	Calypte anna	Calypte	anna	F	AHY	north	northside	PLG							Stunned. Turned over to vets for recovery.
2009-09-05	2009	9	fall	before 800	Dead	1	Zenaida macroura	Zenaida	macroura	U	U	???	?	?	skin 09/06/09 PLG	96925	PLG798	M	U	90% oss	Left at business reception.
2009-09-05	2009	9	fall	830		0								PLG
2009-09-07	2009	9	fall	830		0								MEF
2009-09-08	2009	9	fall	745		0								MEF
2009-09-09	2009	9	fall	900		0								PLG
2009-09-10	2009	9	fall	815		0								MEF
2009-09-11	2009	9	fall	1130	Dead	1	Calypte anna	Calypte	anna	M	HY	north	northside	Belinda Espinoza	skin 09/12/09 PLG 801	96920	PLG801	M	HY
2009-09-11	2009	9	fall	730		0								MEF
2009-09-12	2009	9	fall	750		0								PLG
2009-09-13	2009	9	fall	715		0								MEF
2009-09-14	2009	9	fall	800		0								MEF
2009-09-15	2009	9	fall	800		0								MEF
2009-09-16	2009	9	fall	900		0								PLG
2009-09-17	2009	9	fall	745		0								MEF
2009-09-18	2009	9	fall	830		0								MEF
2009-09-21	2009	9	fall	715		0								MEF
2009-09-21	2009	9	fall	910		0								PLG
2009-09-22	2009	9	fall	845		0								MEF							tent set up in east garden for anniversary weekend
2009-09-23	2009	9	fall	850		0								PLG							tent set up in east garden for anniversary weekend
2009-09-24	2009	9	fall	800		0								MEF
2009-09-25	2009	9	fall	815		0								MEF
2009-09-26	2009	9	fall	1530	Dead	1	Calypte anna	Calypte	anna	M	HY	Staff entrance	south entrance	Belinda Espinoza		not cataloged	PLG846	M	U		tent set up in east garden for anniversary weekend
2009-09-26	2009	9	fall	900		0								PLG							tent set up in east garden for anniversary weekend
2009-09-27	2009	9	fall	830		0								PLG							tent set up in east garden for anniversary weekend
2009-09-28	2009	9	fall	615		0								MEF
2009-09-29	2009	9	fall	845		0								MEF
2009-09-30	2009	9	fall	730		0								MEF
2009-10-01	2009	10	fall	700		0								MEF
2009-10-03	2009	10	fall	1500	Dead	1	Melospiza lincolnii	Melospiza	lincolnii	U	U	east	east garden	Natalie Salgado (Security)		97134	ASG132	M	HY		New Maya Lin Sculture in East garden with strange sounds - may help with window collisions
2009-10-05	2009	10	fall	800		0								MEF							Peter left for PNG 9/29 - no weekend coverage
2009-10-06	2009	10	fall	830	Alive	1	Melospiza lincolnii	Melospiza	lincolnii	U	U	west	west garden	MEF							brought to Freeland
2009-10-07	2009	10	fall	730		0								MEF
2009-10-08	2009	10	fall	830		0								MEF
2009-10-09	2009	10	fall	815		0								MEF
2009-10-10	2009	10	fall		Dead	1	Setophaga coronata	Setophaga	coronata			???		N. Estival (Security)		not cataloged	ASG158	M	U
2009-10-11	2009	10	fall			0
2009-10-12	2009	10	fall			0
2009-10-13	2009	10	fall	after 855	Dead	1	Selasphorus sasin	Selasphorus	sasin	U	U	east	East Garden	Jose Barillas (Security)		96622	LCW273	M	HY	pickle; corr. 50%; very thin outer rec with white tip
2009-10-13	2009	10	fall	855		0								ASG
2009-10-14	2009	10	fall	before 850	Dead	1	Setophaga coronata	Setophaga	coronata	F	Adult	east	East Earden	N. Estival (Security)
2009-10-19	2009	10	fall		Dead	1	Melospiza melodia	Melospiza	melodia	U	U	west	west garden	Tina Liang		not cataloged	MHM026	M	U
2009-10-19	2009	10	fall	745		0								MEF							MEF out of office October 10 - 18
2009-10-20	2009	10	fall	815		0								MEF
2009-10-21	2009	10	fall	800		0								MEF
2009-10-21	2009	10	fall	1030	Alive	1	Hummingbird sp.					???		Freeland Dunker							1 hummingbird (not viewed by O&M or AQ) alive hit window, stunned for a few minutes and then flew off
2009-10-22	2009	10	fall	1323	Dead	1	Calypte anna	Calypte	anna	M	HY	west	west garden	Eric Bolich		not cataloged	ASG148	M	HY
2009-10-22	2009	10	fall	900	Dead	1	Melospiza melodia	Melospiza	melodia	U	HY	east	east garden	MEF		not cataloged	CEC018	M	U
2009-10-23	2009	10	fall	800		0								MEF
2009-10-26	2009	10	fall	800		0								MEF
2009-10-27	2009	10	fall	815		0								MEF
2009-10-28	2009	10	fall	915		0								ASG
2009-10-29	2009	10	fall	1055		0								ASG
2009-11-03	2009	11	fall		Dead	1	Calypte anna	Calypte	anna	M	HY	west	West Garden	Kery Chang		not cataloged	ASG157	M	HY
2009-11-03	2009	11	fall		Dead	1	Catharus guttatus	Catharus	guttatus	U	U	west	West Garden	Beatriz Zaldivar		not cataloged	ASG159	F	U
2009-11-04	2009	11	fall	720		0								MEF		Moe on vacation 10/28 - 11/3
2009-11-05	2009	11	fall	815		0								MEF
2009-11-06	2009	11	fall	815		0								MEF
2009-11-08	2009	11	fall		Dead	1	Sayornis nigricans	Sayornis	nigricans	U	U	east	east garden	M. Chaney		not cataloged	MK1098	M	U	100% oss
2009-11-09	2009	11	fall	730	Alive	1	Setophaga coronata	Setophaga	coronata	U	U	west	west garden	MEF		stunned but able to fly - placed in tree near mews
2009-11-10	2009	11	fall	800	Dead	1	Junco hyemalis	Junco	hyemalis	U	U	west	west garden	MEF		not cataloged	PLG848	F	U
2009-11-12	2009	11	fall	815		0								MEF
2009-11-13	2009	11	fall	915		0								MEF
2009-11-16	2009	11	fall	800		0								MEF
2009-11-17	2009	11	fall	730		0								MEF
2009-11-18	2009	11	fall	730		0								MEF
2009-11-19	2009	11	fall	1350	Dead	1	Calypte anna	Calypte	anna	M	Adult	north	northside	Guest Services		not cataloged	ASG161	M	A		Sharp Shooter saw bird hit window and fall at main entrance
2009-11-19	2009	11	fall	1030	Dead	1	Calypte anna	Calypte	anna	F	HY	north	northside	MEF		not cataloged	PLG844	F	U
2009-11-19	2009	11	fall	830		0								MEF
2009-11-20	2009	11	fall	800		0								MEF
2009-11-20	2009	11	fall	1030	Alive	1	Euphagus cyanocephalus	Euphagus	cyanocephalus	U	U	west	westside	reported by landscaping crew to be stunned under one of the benches (Moe referred them to vet staff)
2009-11-22	2009	11	fall		Dead	1	Catharus guttatus	Catharus	guttatus	U	U	west	westside	N. Estival (Security)		not cataloged	PLG843	F	HY		aged based on buffy coverts, 8/8/2014
2009-11-23	2009	11	fall	815		0								MEF
2009-11-24	2009	11	fall		Dead	1	Catharus guttatus	Catharus	guttatus	U	U	west	west garden	Security		not cataloged	PLG845	F	U
2009-11-24	2009	11	fall	1115		0								ASG
2009-11-25	2009	11	fall	745		0								PLG
2009-11-27	2009	11	fall	715		0								PLG
2009-11-28	2009	11	fall	800		0								PLG
2009-11-30	2009	11	fall	800		0								MEF
2009-12-01	2009	12	winter		Dead	1	Calypte anna	Calypte	anna	F	HY	west	west garden	W. Campos		not cataloged	PLG852	F	U
2009-12-02	2009	12	winter		Dead	1	Calypte anna	Calypte	anna	M	HY	east	east garden	N. Estival (Security)		not cataloged	PLG851	M	HY		Aged by plumage 8/8/2014
2009-12-02	2009	12	winter	815		0								PLG
2009-12-03	2009	12	winter	750		0								PLG
2009-12-04	2009	12	winter	915		0								MEF
2009-12-05	2009	12	winter	750		0								PLG
2009-12-06	2009	12	winter	820		0								PLG
2009-12-07	2009	12	winter		Dead	1	Calypte anna	Calypte	anna	M	Adult	west	west garden	K. Esquerra		not cataloged	ASG163	M	A		no time recorded - must have been afternoon
2009-12-07	2009	12	winter	815		0								MEF
2009-12-08	2009	12	winter		Dead	1	Calypte anna	Calypte	anna	F	HY	east	east garden	Luis Campos - Security		not cataloged	PLG860	F	U
2009-12-08	2009	12	winter	815		0								MEF
2009-12-09	2009	12	winter	830		0								PLG
2009-12-10	2009	12	winter	815		0								MEF		???	CCO306	U	U
2009-12-11	2009	12	winter	800		0								MEF
2009-12-12	2009	12	winter	750		0								PLG
2009-12-13	2009	12	winter	915		0								MEF
2009-12-14	2009	12	winter	845		0								MEF
2009-12-15	2009	12	winter	815		0								MEF
2009-12-16	2009	12	winter	840		0								PLG
2009-12-17	2009	12	winter	815		0								MEF
2009-12-18	2009	12	winter	830		0								MEF
2009-12-19	2009	12	winter	1045	Dead	1	Calypte anna	Calypte	anna	M	AHY	north	northside	PLG		not cataloged	PLG869	M	A		aged by plumage 8/8/2014
2009-12-19	2009	12	winter	750		0								PLG
2009-12-21	2009	12	winter	830		0								MEF
2009-12-22	2009	12	winter	815		0								MEF
2009-12-23	2009	12	winter	745		0								PLG
2009-12-23	2009	12	winter	815		0								MEF
2009-12-26	2009	12	winter	800		0								PLG
2009-12-28	2009	12	winter	830		0								MEF
2009-12-29	2009	12	winter	815		0								MEF
2010-01-01	2010	1	winter	915		0								PLG
2010-01-02	2010	1	winter	915		0								PLG
2010-01-04	2010	1	winter	830		0								MEF
2010-01-05	2010	1	winter	815		0								MEF
2010-01-07	2010	1	winter	720		0								PLG
2010-01-08	2010	1	winter	830		0								PLG
2010-01-09	2010	1	winter	800		0								PLG
2010-01-11	2010	1	winter	730		0								MEF
2010-01-13	2010	1	winter	810		0								PLG
2010-01-14	2010	1	winter	745		0								PLG
2010-01-15	2010	1	winter	745		0								MEF
2010-01-16	2010	1	winter	745		0								PLG
2010-01-17	2010	1	winter	900		0								MEF
2010-01-18	2010	1	winter	730		0								MEF
2010-01-19	2010	1	winter	900		0								MEF
2010-01-19	2010	1	winter	2130	Alive	1	Euphagus cyanocephalus	Euphagus	cyanocephalus	U	IMM	west	Academy Café	ASG	flying around in the Academy Café, eventually caught and released
2010-01-20	2010	1	winter	745		0								MEF
2010-01-21	2010	1	winter	900		0								MEF
2010-01-23	2010	1	winter	750		0								PLG
2010-01-25	2010	1	winter	730		0								MEF
2010-01-26	2010	1	winter	700		0								MEF
2010-01-27	2010	1	winter	730		0								MEF
2010-01-27	2010	1	winter	800		0								PLG
2010-01-28	2010	1	winter	800	Dead	1	Passerella iliaca	Passerella	iliaca	U	U	west	westside	MEF	group of Brewer's Blackbirds standing around carcass	not cataloged	MK1105	M	A	100% oss
2010-01-29	2010	1	winter	645		0								MEF
2010-01-30	2010	1	winter	800		0								PLG
2010-01-31	2010	1	winter	745		0								MEF
2010-02-01	2010	2	winter	815	Dead	1	Calypte anna	Calypte	anna	west	westside	west	westside	MEF	Appeared as if they hit the window during a territory chase, both were on the ground within 2 feet of each other, ants crawling on both specimens	not cataloged	CCO483	M	A		location updated on 8/7/2014
2010-02-01	2010	2	winter	815	Dead	1	Calypte anna	Calypte	anna	M	A	west	westside	MEF	Appeared as if they hit the window during a territory chase, both were on the ground within 2 feet of each other, ants crawling on both specimens	not cataloged	CCO486	M	A
2010-02-02	2010	2	winter	800		0								MEF
2010-02-03	2010	2	winter	815		0								MEF, PLG
2010-02-04	2010	2	winter	815		0								MEF
2010-02-05	2010	2	winter	800	Dead	1	Pipilo crissalis	Pipilo	crissalis	U	U	west	westside	MEF		not cataloged	MHM033	M	A
2010-02-06	2010	2	winter	750		0								PLG
2010-02-07	2010	2	winter		Dead	1	Turdus migratorius	Turdus	migratorius	U	U	east	eastside	Alex You		not cataloged	ASG175	M	A
2010-02-08	2010	2	winter	830		0								MEF
2010-02-09	2010	2	winter	815		0								MEF
2010-02-10	2010	2	winter	815		0								MEF
2010-02-12	2010	2	winter	800		0								OC
2010-02-13	2010	2	winter	750		0								PLG
2010-02-16	2010	2	winter	815		0								MEF
2010-02-17	2010	2	winter	745		0								MEF
2010-02-20	2010	2	winter	715		0								PLG
2010-02-21	2010	2	winter	745		0								MEF
2010-02-22	2010	2	winter	815		0								MEF
2010-02-23	2010	2	winter	830		0								MEF
2010-02-25	2010	2	winter	900		0								MEF
2010-02-26	2010	2	winter	900		0								MEF
2010-03-01	2010	3	spring	815		0								MEF
2010-03-02	2010	3	spring	745		0								MEF
2010-03-03	2010	3	spring	815		0								MEF
2010-03-04	2010	3	spring	815		0								MEF
2010-03-05	2010	3	spring	830		0								MEF
2010-03-08	2010	3	spring	900		0								MEF
2010-03-09	2010	3	spring	800		0								MEF
2010-03-10	2010	3	spring	800		0								MEF
2010-03-11	2010	3	spring	800		0								MEF
2010-03-12	2010	3	spring	830		0								MEF
2010-03-14	2010	3	spring	730		0								MEF
2010-03-15	2010	3	spring	900		0								MEF
2010-03-17	2010	3	spring	900		0								MEF
2010-03-18	2010	3	spring	815		0								MEF
2010-03-19	2010	3	spring	915		0								MEF
2010-03-22	2010	3	spring	830		0								MEF
2010-03-23	2010	3	spring	815		0								MEF
2010-03-24	2010	3	spring	815		0								MEF
2010-03-25	2010	3	spring	1500	Dead	1	Psaltriparus minimus	Psaltriparus	minimus	U	U	east	east garden	MEF	CCO skinned 3/29/10	not cataloged	CCO035	F	A
2010-03-25	2010	3	spring	815		0								MEF
2010-03-26	2010	3	spring	915		0								MEF
2010-03-29	2010	3	spring	815		0								MEF
2010-03-30	2010	3	spring	830		0								MEF
2010-03-31	2010	3	spring	815		0								MEF
2010-04-01	2010	4	spring	815		0								MEF
2010-04-04	2010	4	spring	unknown	Dead	1	Euphagus cyanocephalus	Euphagus	cyanocephalus	U	IMM	north	north side (main enterance)	Hershow Albarazi	MHM skinned 4/6/10	not cataloged	MHM037	F	A		aged by plumage 8/8/2014
2010-04-04	2010	4	spring	900		0								ASG
2010-04-04	2010	4	spring	afternoon	Alive	1	Calypte anna	Calypte	anna	U	U	east	east garden	Aquarium staff	2 hummingbirds were found stunned, one flew away after a short while and the other was successfully released later in the evening.
2010-04-04	2010	4	spring	afternoon	Alive	1	Calypte anna	Calypte	anna	U	U	east	east garden	Aquarium staff	2 hummingbirds were found stunned, one flew away after a short while and the other was successfully released later in the evening.
2010-04-06	2010	4	spring	915		0								ASG
2010-04-07	2010	4	spring	845		0								ASG
2010-04-09	2010	4	spring	unknown	Dead	1	Calypte anna	Calypte	anna	M	HY	east	east garden	A. Perez	left in freezer - aged HY by grooves in bill and male by few gorget feathers; PJY036 pickled 10/28/2010	96756	PJY036	M	HY		Fixed and stored in Ethanol, age determination by plumage, sex determinations conflicting between MEF and PJY. MEF determined age by grooves in bill, presumed male due to few gorget feathers. PJY assumed female due to plumage.
2010-04-12	2010	4	spring	1053	Dead	1	Calypte anna	Calypte	anna	M	Adult	east	east garden	Security - Natalie	1053 MEF phoned Ari Harding inquiring why east shades are up today	not cataloged	ASG199	M	A
2010-04-12	2010	4	spring	900		0								MEF	east shades open during morning survey
2010-04-13	2010	4	spring	unknown	Dead	1	Selasphorus sasin	Selasphorus	sasin	U	U	west	westside	Kary Zaldivar		not cataloged	CCO308	U	U
2010-04-13	2010	4	spring	915		0								MEF
2010-04-13	2010	4	spring	1200	Alive	1	Hirundo rustica	Hirundo	rustica	U	U	Staff entrance	south windows	MEF	phoned to MEF from Security, flew off when capture was attempted.
2010-04-14	2010	4	spring	900		0								MEF
2010-04-15	2010	4	spring	830		0								MEF
2010-04-16	2010	4	spring	830		0								MEF
2010-04-17	2010	4	spring	900		0								MEF
2010-04-19	2010	4	spring	830		0								MEF
2010-04-20	2010	4	spring	830		0								MEF
2010-04-21	2010	4	spring	830		0								MEF
2010-04-22	2010	4	spring	830		0								MEF
2010-04-26	2010	4	spring	830		0								MEF
2010-04-27	2010	4	spring	845		0								MEF	east shades open during morning survey
2010-04-28	2010	4	spring	830		0								MEF
2010-04-29	2010	4	spring	830		0								MEF
2010-04-30	2010	4	spring	815	Dead	1	Selasphorus sasin	Selasphorus	sasin	M	AHY	west	westside	MEF	measurements taken to determine species, excellent condition for study skin	not cataloged	ASG200	M	A
2010-05-01	2010	5	spring	930		0								MEF
2010-05-03	2010	5	spring	815		0								MEF
2010-05-04	2010	5	spring	815		0								MEF
2010-05-06	2010	5	spring	815		0								MEF
2010-05-10	2010	5	spring	845		0								MEF	noticed shades not down in the afternoon at 1600h
2010-05-11	2010	5	spring	1115	Dead	1	Selasphorus sasin	Selasphorus	sasin	F?	U	west	westside	C. Kang	brought down by security; PJY037 pickled 10/28/2010	96757	PJY037	F	HY
2010-05-11	2010	5	spring	835		0								MEF
2010-05-12	2010	5	spring	900		0								MEF
2010-05-13	2010	5	spring	1430	Dead	1	Euphagus cyanocephalus	Euphagus	cyanocephalus	M	AHY	north	northside	Luis Campos	Security; CCO skinned 5/17/2010		CCO038	M	A		sexed/aged by plumage 8/8/2014
2010-05-13	2010	5	spring	830		0								MEF
2010-05-14	2010	5	spring	830		0								MEF
2010-05-17	2010	5	spring	830		0								MEF
2010-05-18	2010	5	spring	815		0								MEF
2010-05-19	2010	5	spring	845		0								MEF
2010-05-20	2010	5	spring	845		0								MEF
2010-05-22	2010	5	spring		Dead	1	Catharus ustulatus	Catharus	ustulatus	U	U	B2	soutside, B2West	Anthea Carmichael	Norm and Meghan noticed bird on 5/22, Anthea picked it up on 5/24	not cataloged	ASG204	U	A		aged by plumage 8/8/2015
2010-05-24	2010	5	spring	900		0								MEF
2010-05-25	2010	5	spring	845		0								MEF
2010-05-26	2010	5	spring	830	Dead	1	Selasphorus sasin	Selasphorus	sasin	M	HY	west	westside	MEF		not cataloged	MK1117	M	HY
2010-05-27	2010	5	spring	845		0								MEF
2010-05-28	2010	5	spring	830		0								MEF
2010-06-07	2010	6	summer	845		0								MEF
2010-06-08	2010	6	summer	845		0								MEF
2010-06-09	2010	6	summer	845		0								MEF
2010-06-10	2010	6	summer	930	Dead	1	Selasphorus sasin	Selasphorus	sasin	U	HY	west	westside	Luis Campos		not cataloged	CCO299	U	U
2010-06-10	2010	6	summer	900		0								MEF
2010-06-11	2010	6	summer	1330	Dead	1	Selasphorus sasin	Selasphorus	sasin	U	HY	west	westside	Ian M. Bell	MEF checked shades at 3pm which were down at the time	not cataloged	CCO485	F	HY
2010-06-11	2010	6	summer	845		0								MEF
2010-06-14	2010	6	summer	845		0								MEF
2010-06-15	2010	6	summer	1230	Dead	1	Selasphorus sasin	Selasphorus	sasin	U	HY	west	westside	Luis Campos		not cataloged	ASG244	M	HY
2010-06-15	2010	6	summer	845		0								MEF
2010-06-16	2010	6	summer	845		0								MEF
2010-06-17	2010	6	summer	845		0								MEF
2010-06-18	2010	6	summer	845		0								MEF
2010-06-20	2010	6	summer	1620	Dead	1	Selasphorus sasin	Selasphorus	sasin	U	HY	east	eastside	Rob Ronconi		97143	ASG220	F	HY		found in collection 8/8/2014 added prep by ASG; date wrong in ASG notebook, aged and sexed by plumage
2010-06-21	2010	6	summer	845		0								MEF	shades not down on east side during morning survey
2010-06-22	2010	6	summer	830		0								MEF
2010-06-23	2010	6	summer	815		0								MEF
2010-06-25	2010	6	summer	845		0								MEF
2010-06-26	2010	6	summer	1100	Dead	1	Calypte anna	Calypte	anna	U	HY	Staff entrance	South entrance	Beth Goldstein		not cataloged	PJY045	M	HY		aged by plumage 8/8/2014
2010-06-29	2010	6	summer		Dead	1	Calypte anna	Calypte	anna	M	HY	east	East garden	Juan W. (Security?)	No time recorded	not cataloged	MB032	M	HY		aged by plumage 8/8/2014
2010-06-29	2010	6	summer	1000	Dead	1	Junco hyemalis	Junco	hyemalis	U	HY	Staff entrance	South entrance	Custodial services	May have been there for a day or two	not cataloged	PJY029	M	HY		age confirmed by plumage 8/8/2014
2010-06-29	2010	6	summer	900		0								MEF
2010-06-30	2010	6	summer	815		0								MEF
2010-07-01	2010	7	summer	900		0								MEF
2010-07-02	2010	7	summer	1315	Dead	1	Poecile rufescens	Poecile	rufescens	U	HY	west	westside	Eric Bolich	Security - not sure if west screens were down or not at 1315; PJY040 pickled 10/28/2010	96760	PJY040	M	HY
2010-07-02	2010	7	summer	745		0								MEF
2010-07-06	2010	7	summer	815		0								MEF
2010-07-07	2010	7	summer	845		0								MEF
2010-07-08	2010	7	summer		Dead	1	Carpodacus mexicanus	Carpodacus	mexicanus	U	HY	???	unknown	unknown	showed up in Moe'd freezer 7/8 afternoon - no data tag	not cataloged	ASG219	M	HY
2010-07-08	2010	7	summer	845		0								MEF
2010-07-12	2010	7	summer	815		0								MEF
2010-07-13	2010	7	summer	830		0								MEF
2010-07-14	2010	7	summer	830		0								MEF
2010-07-15	2010	7	summer	815		0								MEF
2010-07-16	2010	7	summer	900		0								MEF
2010-07-17	2010	7	summer		Dead	1	Selasphorus sasin	Selasphorus	sasin	U	HY	north	front entrance	Rachel Smith	Guest Services; PJY038 pickled 10/28/2010	96758	PJY038	U	HY
2010-07-19	2010	7	summer	900		0								MEF
2010-07-20	2010	7	summer	900		0								MEF
2010-07-21	2010	7	summer	957	Dead	1	Euphagus cyanocephalus	Euphagus	cyanocephalus	U	HY	west	westside	security		not cataloged	MHM048	M	U
2010-07-22	2010	7	summer	1330	Dead	1	Selasphorus sasin	Selasphorus	sasin	U	HY	north	staff entrance	Charles Griswold		not cataloged	CCO484	F	HY
2010-07-22	2010	7	summer	845	Dead	1	Junco hyemalis	Junco	hyemalis	U	HY	west	westside	MEF		not cataloged	MHM049	M	HY		aged by plumage 8/8/2014
2010-07-23	2010	7	summer	1400	Dead	1	Calypte costae	Calypte	costae	M	HY	north	staff entrance	Norm Penny	Checked ID with Pyle but still not 100% sure.	not cataloged	ASG226	M	HY
2010-07-26	2010	7	summer	830		0								MEF	East screens not down during window check
2010-07-27	2010	7	summer	1600	Dead	1	Calypte anna	Calypte	anna	M	HY	east	east garden	R. Ronconi / M. Ramos		not cataloged	CCO298	U	U
2010-07-27	2010	7	summer	800		0								MEF
2010-07-28	2010	7	summer	800		0								MEF
2010-07-29	2010	7	summer	800		0								MEF	East screens not down during window check
2010-07-30	2010	7	summer	915		0								MEF	East screens not down during window check
2010-08-02	2010	8	summer	815		0								MEF	East screens not down during window check
2010-08-03	2010	8	summer	830		0								MEF
2010-08-04	2010	8	summer	900		0								MEF
2010-08-05	2010	8	summer	830		0								MEF
2010-08-06	2010	8	summer	830		0								MEF
2010-08-07	2010	8	summer	1400	Dead	1	Calypte anna	Calypte	anna	M	HY	north	staff entrance	N. Penny		not cataloged	RJH034	M	U		date in prep notebook was corrected to 1 Aug 2010, could this actually be 7 Aug 2010?
2010-08-09	2010	8	summer	900		0								MEF
2010-08-10	2010	8	summer	845		0								MEF
2010-08-11	2010	8	summer	830		0								MEF
2010-08-12	2010	8	summer	830		0								MEF
2010-08-13	2010	8	summer	830		0								MEF
2010-08-15	2010	8	summer		Dead	1	Calypte anna	Calypte	anna	M?	HY?	west	westside	Custodial services	PJY034 pickled 10/28/10	96754	PJY034	M	U
2010-08-16	2010	8	summer	815		0								MEF
2010-08-17	2010	8	summer	815		0								MEF
2010-08-18	2010	8	summer	1710	Dead	1	Calypte anna	Calypte	anna	U	U	east	East garden	Eric Thomas		not cataloged	CCO058	M	HY		aged by plumage 8/8/2014
2010-08-18	2010	8	summer	745		0								MEF
2010-08-19	2010	8	summer	900		0								MEF
2010-08-21	2010	8	summer		Dead	1	Setophaga townsendi	Setophaga	townsendi	U	U	east	East garden	Security?	in Moe's freezer on Monday morning	not cataloged	MK1122	M	HY		aged by plumage 8/8/2014
2010-08-23	2010	8	summer	2020	Dead	1	Zenaida macroura	Zenaida	macroura	U	U	north	front entrance	Rachel Tom	best for skeleton	97384	RJH029	F	U
2010-08-23	2010	8	summer	815		0								MEF
2010-08-24	2010	8	summer	630		0								ASG
2010-08-24	2010	8	summer	800		0								MEF
2010-08-25	2010	8	summer	800		0								MEF
2010-08-26	2010	8	summer	815		0								MEF
2010-08-27	2010	8	summer	815		0								MEF
2010-08-30	2010	8	summer	815		0								MEF
2010-08-31	2010	8	summer	1511	Dead	1	Calypte anna	Calypte	anna	M?	HY	Staff entrance	staff entrance	Eric Bolich	PJY035 pickled 10/28/2010	96755	PJY035	M	HY		age updated 8/7/2014 based on accession file
2010-08-31	2010	8	summer	830		0								MEF
2010-09-01	2010	9	fall	830		0								MEF
2010-09-02	2010	9	fall	830		0								MEF
2010-09-06	2010	9	fall		Dead	1	Geothlypis trichas	Geothlypis	trichas	M	HY	west	West Garden	Eric Bolich		not cataloged	ASG227	M	HY
2010-09-07	2010	9	fall		dead	1	Wilsonia pusilla	Cardellina	pusilla			Staff entrance	staff entrance	Brenda Melton		not cataloged	MHM050	M	U		added by EJC using MHM prep notebook
2010-09-07	2010	9	fall	915		0								ASG
2010-09-08	2010	9	fall	830		0								MEF
2010-09-09	2010	9	fall	1300	Dead	1	Setophaga petechia	Setophaga	petechia	M?	HY?	north	front entrance	A. Figueroa	(Security)	not cataloged	MK1124	M	HY	25% oss	date corrected 8/7/2014 changed from 9/19/2014 to 9/9/2014 based on accession file
2010-09-09	2010	9	fall	930		0								MEF
2010-09-10	2010	9	fall		Dead	1	Selasphorus sasin	Selasphorus	sasin	U	HY	east	East Garden	Security		not cataloged	ASG231	M	HY
2010-09-13	2010	9	fall	830		0								MEF
2010-09-14	2010	9	fall	1000	Dead	1	Calypte anna	Calypte	anna	U	HY	west	West Garden	Exhibits	Stunned, given to Dr. Frieland Dunker - died that afternoon	not cataloged	LCW432	U	U
2010-09-14	2010	9	fall	800		0								MEF
2010-09-14	2010	9	fall	1245	Dead	1	Calypte anna	Calypte	anna	M	HY	east	East Garden	Kyle (security)
2010-09-15	2010	9	fall	830		0								MEF
2010-09-16	2010	9	fall	840		0								MEF
2010-09-17	2010	9	fall	900		0								MEF
2010-09-20	2010	9	fall	900		0								MEF
2010-09-21	2010	9	fall	900		0								MEF
2010-09-22	2010	9	fall	830		0								MEF
2010-09-23	2010	9	fall	845		0								MEF
2010-09-24	2010	9	fall	1300	Dead	1	Calypte anna	Calypte	anna	M	U	east	East garden	Beatriz Zaldivar	(Security)	97144	ASG257	M	A
2010-09-27	2010	9	fall	915		0								MEF
2010-09-28	2010	9	fall	1730	Dead	1	Junco hyemalis	Junco	hyemalis	U	U	east	East garden	AQ Swing Shift		not cataloged	NAM032	M	U
2010-09-29	2010	9	fall	830		0								MEF
2010-10-04	2010	10	fall	830		0								MEF
2010-10-05	2010	10	fall	815	Dead	1	Melospiza lincolnii	Melospiza	lincolnii	U	U	north	front entrance	Jens Vindum		not cataloged	ASG236	M	U
2010-10-05	2010	10	fall	1100	Dead	1	Junco hyemalis	Junco	hyemalis	U	U	west	west garden	custodial staff		not cataloged	LCW239	U	U
2010-10-06	2010	10	fall	no time recorded	Dead	1	Passerella iliaca	Passerella	iliaca	U	U	west	West Garden	Aldo Figueroa	(Security)	not cataloged	MHM051	U	U
2010-10-06	2010	10	fall	830		0								MEF
2010-10-07	2010	10	fall	830		0								MEF
2010-10-08	2010	10	fall	no time recorded	Dead	1	Calypte anna	Calypte	anna	U	HY	east	East garden	Eric Bolich	(Security); ASG347 pickled 7/7/2011	96750	ASG347	F	U		MEF thought bird to be HY, ASG claimed it as adult F. try to find skin to check age 8/8/2014
2010-10-08	2010	10	fall	830		0								MEF
2010-10-12	2010	10	fall	830		0								MEF
2010-10-13	2010	10	fall	1100	Dead	1	Junco hyemalis	Junco	hyemalis	U	U	west	West Garden	Reyes/Barillas	(Security)	not cataloged	PJY042	M	U		date corrected on 8/7/2014, changed from 10/12/2010 to 10/13/2010 based on accession file
2010-10-13	2010	10	fall	830		0								MEF
2010-10-14	2010	10	fall	830		0								MEF
2010-10-18	2010	10	fall	1200	Dead	1	Zonotrichia leucophrys	Zonotrichia	leucophrys	U	HY	B2	South B2 Window	Christina Cordova		not cataloged	MHM052	F	U
2010-10-18	2010	10	fall	900		0								MEF
2010-10-19	2010	10	fall	830		0								MEF
2010-10-20	2010	10	fall	845		0								MEF
2010-10-21	2010	10	fall	845	Dead	1	Setophaga coronata	Setophaga	coronata	U	U	west	West Garden	MEF	Audubon's Warbler	not cataloged	ASG239	M	U
2010-10-22	2010	10	fall	1000		0								MEF
2010-10-25	2010	10	fall	800	Dead	1	Catharus guttatus	Catharus	guttatus	U	U	east	East Garden	custodial		97643	MEF592	M	HY		age/sex updated from prep notes 8/8/2014
2010-10-25	2010	10	fall	1300	Dead	1	Junco hyemalis	Junco	hyemalis	U	U	B2	South B2 Window	Engineering	Specimen discarded - advanced decomposition, maggot infested
2010-10-26	2010	10	fall	930	Dead	1	Junco hyemalis	Junco	hyemalis	U	U	north	staff entrance	Emily Magnaghi		97158	ASG240	F	A		sexed by plumage 8/8/2014
2010-10-26	2010	10	fall	1115	Dead	1	Calypte anna	Calypte	anna	M?	HY?	north	staff entrance	Barb Barbee	ASG346 pickled 7/7/2011	96741	ASG346	F	A
2010-10-26	2010	10	fall	1130	Dead	1	Catharus guttatus	Catharus	guttatus	U	U	west	West Garden	Victor Kitkeatlers	Security	not cataloged	CCO488	U	U
2010-10-26	2010	10	fall	830		0								MEF
2010-10-31	2010	10	fall	1057	Dead	1	Calypte anna	Calypte	anna	M	HY	west	West Garden	N. Estival		not cataloged	CEC033	M	HY		age entered based on accession file 8/7/2014
2010-11-01	2010	11	fall	830	Dead	1	Geothlypis trichas	Geothlypis	trichas			???	N/A	Patrick Bird	Guest Services	not cataloged	ASG243	M	HY		recorded at prep as HY male by plumage, Originally identified as Wilson’s Warbler, identification changed by ASG when prepping.
2010-11-02	2010	11	fall	910	Dead	1	Zonotrichia atricapilla	Zonotrichia	atricapilla	U	HY	west	West Garden	E. Bolich		not cataloged	PJY041	M	HY
2010-11-02	2010	11	fall	845		0								ASG	Tent fior the winter setup in west garden adjacent to windows
2010-11-04	2010	11	fall	before 1100	Dead	1	Melospiza lincolnii	Melospiza	lincolnii	U	U	east	East Garden	N/A		not cataloged	CEC032	M	HY		aged by plumage on 8/8/2014
2010-11-04	2010	11	fall	1100		0								ASG
2010-11-09	2010	11	fall	1128	Dead	1	Calypte anna	Calypte	anna	U	U	west	West Garden	Natalie	Security	not cataloged	ASG264	F	A		mounted for Spring 2011 Exhibit
2010-11-09	2010	11	fall	815	Dead	1	Calypte anna	Calypte	anna	M	U	north	front entrance	Billy	Guest Services	not cataloged	ASG265	M	A		mounted for Spring 2011 Exhibit; no date in ASG notes, card found in accession file and listed in original 2010 windowkill spreadsheet - deduced prep information and date
2010-11-10	2010	11	fall	830		0								MEF
2010-11-11	2010	11	fall	830		0								MEF
2010-11-12	2010	11	fall	815		0								MEF
2010-11-15	2010	11	fall	800		0								MEF
2010-11-16	2010	11	fall	1000	Dead	1	Calypte anna	Calypte	anna	M	HY	north	Exit door (main entrance)	B. Espinoza	Security	not cataloged	ASG259	M	HY
2010-11-17	2010	11	fall	730		0								MEF
2010-11-18	2010	11	fall	800		0								MEF
2010-11-18	2010	11	fall	1400	Alive	1	Euphagus cyanocephalus	Euphagus	cyanocephalus	U	U	north	front entrance	Alison Rusch	Broken tip of bill, Released by Freeland 11/18 late afternoon
2010-11-19	2010	11	fall	800		0								MEF
2010-11-22	2010	11	fall	845		0								MEF
2010-11-23	2010	11	fall	820		0								MEF
2010-11-29	2010	11	fall	845		0								MEF
2010-11-30	2010	11	fall	845		0								MEF
2010-12-01	2010	12	winter	845		0								MEF
2010-12-07	2010	12	winter	855		0								ASG
2010-12-08	2010	12	winter	900		0								ASG
2010-12-09	2010	12	winter	1445		0								ASG
2010-12-14	2010	12	winter	830		0								MEF
2010-12-15	2010	12	winter	830		0								MEF
2010-12-16	2010	12	winter	800		0								MEF
2010-12-17	2010	12	winter	830		0								MEF
2010-12-20	2010	12	winter	800		0								MEF
2010-12-21	2010	12	winter	830		0								MEF
2010-12-22	2010	12	winter	845		0								MEF
2010-12-23	2010	12	winter	845		0								MEF
2010-12-27	2010	12	winter	845		0								MEF
2010-12-28	2010	12	winter	830		0								MEF
2010-12-29	2010	12	winter	800		0								MEF
2010-12-30	2010	12	winter	830		0								MEF
2011-01-03	2011	1	winter	900		0								MEF
2011-01-04	2011	1	winter	845		0								MEF
2011-01-05	2011	1	winter	830		0								MEF
2011-01-06	2011	1	winter	830		0								MEF
2011-01-07	2011	1	winter	830		0								MEF
2011-01-10	2011	1	winter	1033	Dead	1	Calypte anna	Calypte	anna	F	AHY	west	West garden	Elise Richard	brought to Customer service by a visitor	not cataloged	CCO059	F	A
2011-01-10	2011	1	winter	830		0								MEF
2011-01-11	2011	1	winter	830		0								MEF
2011-01-12	2011	1	winter	830		0								MEF
2011-01-13	2011	1	winter	830		0								MEF
2011-01-14	2011	1	winter	830		0								MEF
2011-01-17	2011	1	winter	830		0								MEF
2011-01-18	2011	1	winter	830		0								MEF
2011-01-19	2011	1	winter	845		0								MEF
2011-01-20	2011	1	winter	845		0								MEF
2011-01-21	2011	1	winter	830		0								MEF
2011-01-24	2011	1	winter	900		0								MEF
2011-01-25	2011	1	winter	830		0								MEF
2011-01-26	2011	1	winter	840		0								MEF
2011-01-27	2011	1	winter	830		0								MEF
2011-01-28	2011	1	winter	830		0								MEF
2011-01-31	2011	1	winter	900		0								MEF
2011-02-01	2011	2	winter	830		0								MEF
2011-02-02	2011	2	winter	830		0								MEF
2011-02-03	2011	2	winter	840		0								MEF
2011-02-04	2011	2	winter	830		0								MEF
2011-02-07	2011	2	winter	845		0								MEF
2011-02-08	2011	2	winter	850		0								MEF
2011-02-09	2011	2	winter	830		0								MEF
2011-02-10	2011	2	winter	900		0								MEF
2011-02-11	2011	2	winter	830		0								MEF
2011-02-14	2011	2	winter	915		0								MEF
2011-02-15	2011	2	winter	845		0								MEF
2011-02-17	2011	2	winter	830		0								MEF
2011-02-18	2011	2	winter	840		0								MEF
2011-02-21	2011	2	winter	830		0								MEF
2011-02-22	2011	2	winter	830		0								MEF
2011-02-24	2011	2	winter	830		0								MEF
2011-02-25	2011	2	winter	830		0								MEF
2011-02-28	2011	2	winter	830		0								MEF
2011-03-01	2011	3	spring	820		0								MEF
2011-03-02	2011	3	spring	845		0								MEF
2011-03-03	2011	3	spring	920		0								MEF
2011-03-07	2011	3	spring	840		0								MEF
2011-03-08	2011	3	spring	830		0								MEF
2011-03-09	2011	3	spring	800		0								MEF
2011-03-10	2011	3	spring	815		0								MEF
2011-03-11	2011	3	spring	830		0								MEF
2011-03-12	2011	3	spring	915		0								MEF
2011-03-14	2011	3	spring	1024	Dead	1	Carpodacus mexicanus	Carpodacus	mexicanus?	M	U	west	westside	Security		not cataloged	MHM080	M	A
2011-03-14	2011	3	spring	900		0								MEF
2011-03-15	2011	3	spring	845		0								MEF
2011-03-16	2011	3	spring	846	Dead	1	Calypte anna	Calypte	anna	F	Adult?	Staff entrance	Southside, reception entrance	Anne Reid		97172	ASG294	F	A
2011-03-16	2011	3	spring	830		0								MEF
2011-03-17	2011	3	spring	900		0								MEF	East and West vertical shades for levels 2 and 3 will be programmed to extend for 24 hours per day, wind speed permitting. To accomplish this, the shades will be sent an EXTEND command once per hour every hour via the BMS system. One windy days, the shades are expected to retract and stay retracted. This schedule will hold from now to May 31.
2011-03-18	2011	3	spring	845		0								MEF
2011-03-21	2011	3	spring	820		0								MEF
2011-03-22	2011	3	spring	830		0								MEF
2011-03-23	2011	3	spring	930	Dead	1	Calypte anna	Calypte	anna	M	HY	north	Northside, entrance between door 4 and exit door	Angela Hile		not cataloged	CCO224	M	HY		Originally identified in spreadsheet as HY M based on plumage. Unsure why changed to Adult U, as it's a hummingbird.
2011-03-24	2011	3	spring	915		0								MEF
2011-03-28	2011	3	spring	830		0								MEF
2011-03-29	2011	3	spring	830		0								MEF
2011-03-30	2011	3	spring	830		0								MEF
2011-03-31	2011	3	spring	845		0								MEF
2011-04-01	2011	4	spring	845		0								MEF
2011-04-04	2011	4	spring	830		0								MEF
2011-04-05	2011	4	spring	845		0								MEF
2011-04-06	2011	4	spring	840		0								MEF
2011-04-07	2011	4	spring	830		0								MEF
2011-04-13	2011	4	spring	830		0								MEF
2011-04-14	2011	4	spring	800		0								MEF
2011-04-15	2011	4	spring	830		0								MEF
2011-04-18	2011	4	spring	830		0								MEF
2011-04-19	2011	4	spring	700		0								MEF
2011-04-20	2011	4	spring	830		0								MEF
2011-04-21	2011	4	spring	800		0								MEF
2011-04-25	2011	4	spring	930	Dead	1	Junco hyemalis	Junco	hyemalis	M	AHY	north	Northside, main lobby	MEF	entered building then hit window trying to get out.	not cataloged	LCW139	M	A
2011-04-25	2011	4	spring	815		0								MEF
2011-04-25	2011	4	spring	930	Alive	1	Junco hyemalis	Junco	hyemalis	M	AHY	Staff entrance	Southside, reception entrance	MEF	Alive, flying around inside south entrance, flew out on its own when doors were propped open.
2011-04-26	2011	4	spring	815		0								MEF
2011-04-27	2011	4	spring	1130	Dead	1	Euphagus cyanocephalus	Euphagus	cyanocephalus	F	AHY	east	East garden	Security		not cataloged	ACH001	F	A
2011-04-28	2011	4	spring	815		0								MEF
2011-04-29	2011	4	spring	830		0								MEF	Large Gala tent set up in the west garden
2011-05-03	2011	5	spring	800		0								MEF
2011-05-04	2011	5	spring	745	Alive	1	Carpodacus mexicanus	Carpodacus	mexicanus	U	Fledgling	west	west garden	MEF	Fledgling House Finch found between the Gala tent and the glass doors to the west hall. Not clear if it had hit the window or only become separated from parents. MEF moved it to the trees outside the west garden.
2011-05-05	2011	5	spring	730		0								MEF
2011-05-09	2011	5	spring	800		0								MEF	Large Gala tent taken down by 5/6
2011-05-10	2011	5	spring	800		0								MEF
2011-05-11	2011	5	spring	800		0								MEF
2011-05-16	2011	5	spring	1100	Dead	1	Junco hyemalis	Junco	hyemalis	U	HY	B2	southside, B2W	Christina Cordova		97173	ASG301	U	HY
2011-05-16	2011	5	spring	800		0								MEF
2011-05-17	2011	5	spring	700		0								MEF
2011-05-18	2011	5	spring	800		0								MEF
2011-05-19	2011	5	spring	800		0								MEF
2011-05-24	2011	5	spring	850		0								ASG
2011-05-25	2011	5	spring	900		0								ASG
2011-05-26	2011	5	spring	1030	Dead	1	Selasphorus sasin	Selasphorus	sasin			east	East garden	C. Kang (Security)	identified by O. Carmi 22 June 2011	not cataloged	LCW394	F	HY		HY M by MEF when initially received. Measurements = F.
2011-06-01	2011	6	summer	800		0								MEF
2011-06-02	2011	6	summer	800		0								MEF
2011-06-03	2011	6	summer	800		0								MEF
2011-06-05	2011	6	summer	1015	Dead	1	Calypte anna	Calypte	anna	U	HY	Staff entrance	Southside, reception entrance	Eric Bolich (Security)		not cataloged	CCO275	M	HY		sexed by CCO at prep, aged by plumage 8/8/2014
2011-06-07	2011	6	summer	850		0								ASG
2011-06-08	2011	6	summer	830		0								ASG
2011-06-12	2011	6	summer	1030	Dead	1	Euphagus cyanocephalus	Euphagus	cyanocephalus	F	AHY	west	West garden	Tina Liang	found between the tent and the building	not cataloged	PJY056	M	HY		age determined by plumage
2011-06-19	2011	6	summer	1155	Dead	1	Selasphorus sasin	Selasphorus	sasin			north	Front member door	Patrick Bird	identified by O. Carmi 22 June 2011	not cataloged	LCW393	F	A		HY M by MEF when initially received. No corrugation seen on bill during prep, wing measurement = F.
2011-06-21	2011	6	summer	830		0								MEF
2011-06-22	2011	6	summer	830		0								MEF
2011-06-23	2011	6	summer	827	Dead	1	Zenaida macroura	Zenaida	macroura	U	AHY	north	Music Concourse	Security (Kyle)		not cataloged	LCW164	M	U
2011-06-23	2011	6	summer	830		0								MEF
2011-06-24	2011	6	summer	830		0								MEF
2011-06-26	2011	6	summer	1220	Dead	1	Sitta pygmaea	Sitta	pygmaea	U	U	north	Front entrance	Nelson		not cataloged	LCW558	M	U
2011-06-27	2011	6	summer	830		0								MEF
2011-06-28	2011	6	summer	845		0								MEF
2011-06-29	2011	6	summer	1035	Dead	1	Selasphorus sasin	Selasphorus	sasin	F?	HY	Staff entrance	Southside, reception entrance	Beth Goldstein		not cataloged	CCO220	F	HY		age updated 8/7/2014 based on accession file card (MEF aged at time of collection)
2011-06-29	2011	6	summer	850		0								MEF
2011-06-30	2011	6	summer	845		0								MEF
2011-07-05	2011	7	summer	845		0								MEF
2011-07-12	2011	7	summer	830		0								MEF
2011-07-13	2011	7	summer	845		0								MEF
2011-07-14	2011	7	summer	800		0								MEF
2011-07-15	2011	7	summer	830		0								MEF
2011-07-18	2011	7	summer	830		0								MEF
2011-07-19	2011	7	summer	845		0								MEF
2011-07-20	2011	7	summer	1730	Dead	1	Selasphorus sasin	Selasphorus	sasin	F?	HY	north	Front member door	R. Ronconi / M. Ramos		not cataloged	CCO222	F	HY		CCO claims F by plumage, look at skin.
2011-07-20	2011	7	summer	745		0								MEF
2011-07-21	2011	7	summer	815		0								MEF
2011-07-22	2011	7	summer	1030	Dead	1	Calypte anna	Calypte	anna	U	HY	Staff entrance	Southside, reception entrance	Alfredo T.	(Security)	not cataloged	LCW396	F	HY		HY determined at collection, F by tail pattern.
2011-07-25	2011	7	summer	835		0								MEF
2011-07-26	2011	7	summer	830		0								MEF
2011-07-27	2011	7	summer	830		0								MEF
2011-07-28	2011	7	summer	845		0								MEF
2011-07-29	2011	7	summer	830		0								MEF
2011-08-01	2011	8	summer	700	Dead	1	Zenaida macroura	Zenaida	macroura	U	U	north	Music Concourse	Custodial staff		not cataloged	CCO085	M	A
2011-08-01	2011	8	summer	850		0								MEF
2011-08-02	2011	8	summer	915		0								MEF
2011-08-03	2011	8	summer	830		0								MEF
2011-08-04	2011	8	summer	845		0								MEF
2011-08-05	2011	8	summer	840		0								MEF
2011-08-06	2011	8	summer	1400	Dead	1	Molothrus ater	Molothrus	ater	U	HY	Staff entrance	Southside, reception entrance	Beth Goldstein	Tag reads - "inside"	not cataloged	CCO088	M	HY
2011-08-08	2011	8	summer	830		0								MEF
2011-08-09	2011	8	summer	845		0								MEF
2011-08-10	2011	8	summer	830		0								MEF
2011-08-11	2011	8	summer	830		0								MEF
2011-08-12	2011	8	summer	730		0								MEF
2011-08-13	2011	8	summer	930		0								MEF
2011-08-15	2011	8	summer	1530	Dead	1	Calypte anna	Calypte	anna	F	HY	north	Front Entrance (door 2)	Dominique Stoddard	Guest Services	not cataloged	CCO186	F	HY		aged and sexed by plumage; Double-check the tail pattern, looks to be F instead of M.
2011-08-15	2011	8	summer	1023	Dead	1	Calypte anna	Calypte	anna	M	HY	north	Front member door	Pat Bird	Guest Services	not cataloged	CCO279	M	HY		aged by plumage 8/8/2014
2011-08-16	2011	8	summer	830		0								MEF
2011-08-17	2011	8	summer	820		0								MEF
2011-08-18	2011	8	summer	830		0								MEF
2011-08-23	2011	8	summer	830		0								MEF
2011-08-24	2011	8	summer	830		0								MEF
2011-08-25	2011	8	summer	820		0								MEF
2011-08-29	2011	8	summer	830		0								MEF
2011-08-30	2011	8	summer	1245	Dead	1	Junco hyemalis	Junco	hyemalis	U	HY	B2	B2 EAST, outside IZG	Sara Stebick		not cataloged	MK1141	M	U
2011-08-30	2011	8	summer	830		0								MEF
2011-08-31	2011	8	summer	830		0								MEF
2011-09-01	2011	9	fall	835		0								MEF
2011-09-02	2011	9	fall	830		0								MEF
2011-09-05	2011	9	fall	900		0								MEF
2011-09-06	2011	9	fall	815		0								MEF
2011-09-07	2011	9	fall	1110	Dead	1	Setophaga petechia	Setophaga	petechia	U	HY	B2	B2 South, outside Norm Penny's Desk	ASG		not cataloged	MK1138	F	U
2011-09-08	2011	9	fall	1200	Dead	1	Setophaga petechia	Setophaga	petechia	U	HY	north	Front entrance	Guest Services	Skull 20% ossified	not cataloged	ASG406	M	HY
2011-09-08	2011	9	fall	745		0								MEF
2011-09-09	2011	9	fall	930		0								MEF
2011-09-12	2011	9	fall	815		0								MEF
2011-09-13	2011	9	fall	900		0								MEF
2011-09-14	2011	9	fall	800		0								MEF
2011-09-15	2011	9	fall	730		0								MEF
2011-09-16	2011	9	fall	730		0								MEF
2011-09-17	2011	9	fall	800		0								MEF
2011-09-18	2011	9	fall	900		0								MEF
2011-09-20	2011	9	fall	830		0								MEF
2011-09-21	2011	9	fall	800		0								MEF
2011-09-22	2011	9	fall	640	Dead	1	Zenaida macroura	Zenaida	macroura	U	U	Staff entrance	soutside, reception entrance	Bob Villegas		not cataloged	CCO318	F	HY
2011-09-22	2011	9	fall	900		0								MEF
2011-09-23	2011	9	fall	830		0								MEF
2011-09-26	2011	9	fall	825		0								MEF
2011-09-27	2011	9	fall	1130	Dead	1	Calypte anna	Calypte	anna	U	HY	north	front entrance	Guest Services (Ernest)		not cataloged	LCW353	M	HY
2011-09-27	2011	9	fall	830		0								MEF
2011-09-28	2011	9	fall	815		0								MEF
2011-09-29	2011	9	fall	1420	Dead	1	Calypte anna	Calypte	anna	M	HY	west	west garden	Heather Aston		not cataloged	LCW375	M	HY
2011-09-29	2011	9	fall	820		0								MEF
2011-09-30	2011	9	fall	745		0								MEF
2011-10-03	2011	10	fall	800		0								MEF
2011-10-04	2011	10	fall	800		0								MEF
2011-10-05	2011	10	fall	900		0								MEF
2011-10-06	2011	10	fall	830		0								MEF
2011-10-07	2011	10	fall	840		0								MEF
2011-10-11	2011	10	fall	1210	Dead	1	Calypte anna	Calypte	anna	M	AHY	north	front entrance	Rachel Smith	guest services	not cataloged	CCO183	M	A		aged by plumage 8/8/2014
2011-10-11	2011	10	fall	845		0								MEF
2011-10-12	2011	10	fall	1055	Dead	1	Calypte anna	Calypte	anna	M	HY	north	Front entrance	Tane'a Tolbert	Guest Services	not cataloged	CCO215	M	HY		age updated 8/7/2014 based on accession file card (MEF aged at time of collection)
2011-10-12	2011	10	fall	845		0								MEF
2011-10-13	2011	10	fall	1100	Alive	1	Calypte anna	Calypte	anna	M	HY	Staff entrance	staff entrance	Anne Reid	Dr. Dunker fed sugar water and released
2011-10-17	2011	10	fall	830		0								MEF
2011-10-18	2011	10	fall	815		0								MEF
2011-10-19	2011	10	fall	830		0								MEF
2011-10-20	2011	10	fall	915		0								MEF
2011-10-21	2011	10	fall	830		0								MEF
2011-10-24	2011	10	fall	830		0								MEF
2011-10-25	2011	10	fall	800	Dead	1	Zonotrichia atricapilla	Zonotrichia	atricapilla	U	U	north	Front entrance	W. Woo	Security	not cataloged	LCW246	U	HY
2011-10-25	2011	10	fall	830		0								MEf
2011-10-26	2011	10	fall	800		0								ASG
2011-10-27	2011	10	fall	1645	Dead	1	Euphagus cyanocephalus	Euphagus	cyanocephalus	M	U	north	Front entrance	Freeland Dunker	Hit live, then Freeland provided symptomatic treatment, no improvement, euthanized (carcass in AQ freezer as of Oct 28 2011)	not cataloged	SSB005	M	U
2011-10-27	2011	10	fall	830		0								MEF
2011-10-28	2011	10	fall	850		0								MEF
2011-10-30	2011	10	fall	AM	Dead	1	Calypte anna	Calypte	anna	M	U	Staff entrance	staff entrance	Anne Reid		not cataloged	LCW350	M	A
2011-10-31	2011	10	fall	830		0								MEF
2011-11-01	2011	11	fall	830		0								MEF
2011-11-02	2011	11	fall	845		0								MEF
2011-11-03	2011	11	fall	850		0								MEF
2011-11-06	2011	11	fall	1055	Dead	1	Zenaida macroura	Zenaida	macroura	U	U	Staff entrance	staff entrance	Anne Reid	Top of window	not cataloged	NAM075	M	U
2011-11-07	2011	11	fall	900		0								MEF
2011-11-08	2011	11	fall	1430	Dead	1	Euphagus cyanocephalus	Euphagus	cyanocephalus	F	U	north	Front entrance	Jon Shaffer	Guest Services	not cataloged	NAM059	F	U
2011-11-08	2011	11	fall	900		0								MEF
2011-11-09	2011	11	fall	840		0								MEF
2011-11-10	2011	11	fall	830		0								MEF
2011-11-14	2011	11	fall	1053	Dead	1	Passerella iliaca	Passerella	iliaca	U	U	west	West Garden	Kyle	Security	not cataloged	CCO128	M	U
2011-11-15	2011	11	fall	??	Dead	1	Calypte anna	Calypte	anna	M	U	???	Unknown	Unknown (custodial?)	Moe came back after 4 days away and found a dead hummingbird in a black garbage bag just left on her desk. No data included. Likely from custodial.	96657	LCW395	M	A
2011-11-15	2011	11	fall	845		0								MEF
2011-11-16	2011	11	fall	900		0								MEF
2011-11-21	2011	11	fall	830		0								MEF
2011-11-22	2011	11	fall	800		0								MEF
2011-11-23	2011	11	fall	815		0								MEF
2011-11-28	2011	11	fall	830		0								MEF
2011-11-29	2011	11	fall	835		0								MEF
2011-11-30	2011	11	fall	825		0								MEF
2011-12-02	2011	12	winter	800		0								MEF
2011-12-05	2011	12	winter	830		0								MEF
2011-12-07	2011	12	winter	830		0								MEF
2011-12-08	2011	12	winter	830		0								MEF
2011-12-20	2011	12	winter	1520	Dead	1	Euphagus cyanocephalus	Euphagus	cyanocephalus	F	AHY	west	west garden	Trong Tran	Security	not cataloged	NAM065	F	U
2011-12-21	2011	12	winter	1300	Dead	1	Setophaga coronata	Setophaga	coronata	U	U	B2	south side, B2	Jere Schweikert and Ore Carmi		not cataloged	LCW339	F	U
2011-12-22	2011	12	winter	800		0								MEF
2011-12-23	2011	12	winter	800		0								MEF
2011-12-27	2011	12	winter	745		0								MEF
2011-12-28	2011	12	winter	800		0								MEF
2011-12-30	2011	12	winter	845		0								MEF
2012-01-03	2012	1	winter	830		0								MEF
2012-01-04	2012	1	winter	830		0								MEF
2012-01-05	2012	1	winter	820		0								MEF
2012-01-06	2012	1	winter	1625	Dead	1	Euphagus cyanocephalus	Euphagus	cyanocephalus	U	U	north	Front entrance	Tanea Tolbert	guest services	not cataloged	AMS014	F	A	100% oss
2012-01-06	2012	1	winter	845		0								MEF
2012-01-07	2012	1	winter	920		0								MEF
2012-01-09	2012	1	winter	830		0								MEF
2012-01-09	2012	1	winter	1300	Alive	1	Setophaga coronata	Setophaga	coronata	F	U	Staff entrance	staff entrance	security and Reception	caught by Security, had been in building all day, Freeland and Moe gave subcu fluids, released at 1500 alert and active
2012-01-10	2012	1	winter	815		0								MEF
2012-01-12	2012	1	winter	820		0								MEF
2012-01-13	2012	1	winter	830		0								MEF
2012-01-14	2012	1	winter	1330	Dead	1	Calypte anna	Calypte	anna	U	U	Staff entrance	business reception			not cataloged	LCW422	F	A
2012-01-14	2012	1	winter	930		0								MEF
2012-01-17	2012	1	winter	815		0								MEF
2012-01-18	2012	1	winter	845		0								MEF
2012-01-18	2012	1	winter	1600	Alive	1	Setophaga coronata	Setophaga	coronata	U	U	B2	south windows B2W	Jere Schweikert	flew away at top of loading dock after a few quiet moments
2012-01-21	2012	1	winter	1400	Dead	1	Calypte anna	Calypte	anna	U	U	east	east garden	unknown		not cataloged	LCW431	F	A
2012-01-25	2012	1	winter	820		0								MEF
2012-01-26	2012	1	winter	830		0								MEF
2012-01-27	2012	1	winter	820		0								MEF
2012-01-29	2012	1	winter	915		0								MEF
2012-01-30	2012	1	winter	915		0								MEF
2012-01-31	2012	1	winter	800		0								MEF
2012-02-01	2012	2	winter	830		0								MEF
2012-02-02	2012	2	winter	815		0								MEF
2012-02-03	2012	2	winter	800		0								MEF
2012-02-04	2012	2	winter	945		0								CCO
2012-02-05	2012	2	winter	835	Dead	1	Passerella iliaca	Passerella	iliaca	U	U	west	West Garden	Jessica Gills	Guest services	not cataloged	CCO174	M	A		Testes measured during prep
2012-02-06	2012	2	winter	unknown	Dead	1	Setophaga coronata	Setophaga	coronata	U	U	???	unknown	custodial?	No data, Found in freezer on Moe's desk on 2/6 likely hit 2/4 or 2/5	not cataloged	LCW426	M	A
2012-02-06	2012	2	winter	715		0								MEF
2012-02-07	2012	2	winter	800		0								MEF
2012-02-08	2012	2	winter	815		0								MEF
2012-02-16	2012	2	winter	900		0								MEF
2012-02-17	2012	2	winter	800		0								MEF
2012-02-21	2012	2	winter	840		0								MEF
2012-02-22	2012	2	winter	915		0								MEF
2012-02-23	2012	2	winter	830		0								MEF	shades open both sides
2012-02-24	2012	2	winter	850		0								MEF	shades open both sides
2012-02-27	2012	2	winter	900		0								MEF	shades closed again
2012-02-28	2012	2	winter	845		0								MEF
2012-02-29	2012	2	winter	815		0								MEF
2012-03-01	2012	3	spring	745		0								MEF
2012-03-02	2012	3	spring	750		0								MEF
2012-03-05	2012	3	spring	745		0								MEF
2012-03-10	2012	3	spring	855		0								LCW
2012-03-11	2012	3	spring	857		0								CCO
2012-03-12	2012	3	spring	900		0								MEF
2012-03-13	2012	3	spring	915		0								MEF
2012-03-14	2012	3	spring	900		0								MEF
2012-03-15	2012	3	spring	830		0								MEF
2012-03-16	2012	3	spring	800		0								MEF
2012-03-18	2012	3	spring	905		0								CCO
2012-03-20	2012	3	spring	1145		0								MEF
2012-03-21	2012	3	spring	820		0								MEF
2012-03-22	2012	3	spring	800		0								MEF
2012-03-24	2012	3	spring	900		0								CCO
2012-03-26	2012	3	spring	750		0								MEF
2012-03-27	2012	3	spring	815		0								MEF
2012-03-28	2012	3	spring	800		0								MEF
2012-03-29	2012	3	spring	745		0								MEF
2012-03-30	2012	3	spring	830		0								MEF
2012-04-02	2012	4	spring	840		0								MEF
2012-04-03	2012	4	spring	810		0								MEF
2012-04-04	2012	4	spring	815		0								MEF
2012-04-05	2012	4	spring	800		0								MEF
2012-04-06	2012	4	spring
2012-04-07	2012	4	spring	900		0								LCW
2012-04-08	2012	4	spring	858		0								CCO
2012-04-11	2012	4	spring	830		0								LCW
2012-04-14	2012	4	spring	900		0								CCO
2012-04-15	2012	4	spring	900		0								LCW
2012-04-18	2012	4	spring	815		0								LCW
2012-04-21	2012	4	spring	900		0								LCW
2012-04-22	2012	4	spring	915		0								CCO
2012-04-23	2012	4	spring	845		0								MEF
2012-04-24	2012	4	spring	945		0								MEF
2012-04-25	2012	4	spring	840	Dead	1	Cardellina pusilla	Cardellina	pusilla	M	Adult	north	Concourse	Tanea Tolbert	Guest services, was left in project lab freezer	not cataloged	LCW403	F	A
2012-04-25	2012	4	spring	830		0								MEF
2012-04-26	2012	4	spring	820		0								MEF
2012-04-27	2012	4	spring	800		0								MEF
2012-04-28	2012	4	spring	900		0								LCW
2012-04-29	2012	4	spring	910	Dead	1	Calypte anna	Calypte	anna	south	Employee entrance	Staff entrance	Employee entrance	CCO	found together	not cataloged	CCO382	M	A		aged by plumage 8/8/2014
2012-04-29	2012	4	spring	910	Dead	1	Calypte anna	Calypte	anna	M	AD/AHY	Staff entrance	Employee entrance	CCO	found together	not cataloged	CCO407	M	HY		aged by plumage 8/8/2014
2012-04-30	2012	4	spring	820		0								MEF
2012-05-02	2012	5	spring	800		0								MEF
2012-05-03	2012	5	spring	815		0								MEF
2012-05-04	2012	5	spring	845		0								MEF
2012-05-05	2012	5	spring	830		0								MEF
2012-05-06	2012	5	spring	900		0								CCO
2012-05-08	2012	5	spring	845		0								MEF
2012-05-08	2012	5	spring	1050	Alive	1	Calypte anna	Calypte	anna	U	HY	Staff entrance	staff entrance	MEF	cared for by Freeland for several hours and released successfully
2012-05-09	2012	5	spring	830		0								MEF
2012-05-10	2012	5	spring	845		0								MEF
2012-05-12	2012	5	spring	900		0								LCW
2012-05-13	2012	5	spring	858		0								CCO
2012-05-14	2012	5	spring	830		0								MEF
2012-05-16	2012	5	spring	900		0								MEF
2012-05-17	2012	5	spring	1000		0								MEF	Shades open due to wind
2012-05-18	2012	5	spring	745		0								MEF
2012-05-19	2012	5	spring	900		0								LCW
2012-05-20	2012	5	spring	1535	Dead	1	Selasphorus sasin	Selasphorus	sasin			Staff entrance	Member door, front entrance	Angela Hile		97078	LCW421	M	HY	pickle; corr. 20%; very thin outer rec with white tip
2012-05-21	2012	5	spring	900		0								MEF
2012-05-22	2012	5	spring	915		0								MEF
2012-05-23	2012	5	spring	830		0								MEF
2012-05-24	2012	5	spring	845		0								MEF
2012-05-25	2012	5	spring	900		0								MEF
2012-05-26	2012	5	spring	905		0								CCO
2012-05-28	2012	5	spring	930		0								MEF
2012-05-29	2012	5	spring	900		0								MEF
2012-05-30	2012	5	spring	945		0								MEF
2012-05-31	2012	5	spring	915		0								MEF
2012-06-01	2012	6	summer	845		0								LCW
2012-06-02	2012	6	summer	900		0								CCO
2012-06-03	2012	6	summer	900		0								LCW
2012-06-04	2012	6	summer	915		0								MEF
2012-06-05	2012	6	summer	735		0								MEF
2012-06-06	2012	6	summer	1000		0								MEF
2012-06-07	2012	6	summer	900		0								MEF	Beginnig 6/7 - In order to provide more natural light for the baby ostriches it was decided that the north and central sections of the west screens would be raised daily from 9am to 7pm through the deinstallation of the ostrich exhibit;It appeared that the screens had not been properly programmed for the ostrich chicks and remained down for the most part, each day. Thus shade deployment is unreli…
2012-06-08	2012	6	summer	900		0								MEF	Beginnig 6/7 - In order to provide more natural light for the baby ostriches it was decided that the north and central sections of the west screens would be raised daily from 9am to 7pm through the deinstallation of the ostrich exhibit;It appeared that the screens had not been properly programmed for the ostrich chicks and remained down for the most part, each day. Thus shade deployment is unreli…
2012-06-09	2012	6	summer	130	Dead	1	Selasphorus sasin	Selasphorus	sasin			north	Member door, front entrance	Ricardo Gusdo	Beginnig 6/7 - In order to provide more natural light for the baby ostriches it was decided that the north and central sections of the west screens would be raised daily from 9am to 7pm through the deinstallation of the ostrich exhibit;It appeared that the screens had not been properly programmed for the ostrich chicks and remained down for the most part, each day. Thus shade deployment is unreli…	not cataloged	LCW430	F	HY		HY by bill corrugation, F by measurements.
2012-06-15	2012	6	summer	900	Alive	1	Troglodytes troglodytes	Troglodytes	troglodytes			west	West Garden	CCO	Beginnig 6/7 - In order to provide more natural light for the baby ostriches it was decided that the north and central sections of the west screens would be raised daily from 9am to 7pm through the deinstallation of the ostrich exhibit;It appeared that the screens had not been properly programmed for the ostrich chicks and remained down for the most part, each day. Thus shade deployment is unreli…	Found alive, on its side, outside of door. warmed in hands, released it scuttled away on foot.
2012-06-16	2012	6	summer	855		0								CCO	Beginnig 6/7 - In order to provide more natural light for the baby ostriches it was decided that the north and central sections of the west screens would be raised daily from 9am to 7pm through the deinstallation of the ostrich exhibit;It appeared that the screens had not been properly programmed for the ostrich chicks and remained down for the most part, each day. Thus shade deployment is unreli…
2012-06-17	2012	6	summer	1100	Alive	1	Accipiter cooperii	Accipiter	cooperii	U	HY	Staff entrance	staff entrance	OC	Beginnig 6/7 - In order to provide more natural light for the baby ostriches it was decided that the north and central sections of the west screens would be raised daily from 9am to 7pm through the deinstallation of the ostrich exhibit;It appeared that the screens had not been properly programmed for the ostrich chicks and remained down for the most part, each day. Thus shade deployment is unreli…	hit window and then recovered slowly in the area throughout the day
2012-06-19	2012	6	summer	1000		0								MEF	Beginnig 6/7 - In order to provide more natural light for the baby ostriches it was decided that the north and central sections of the west screens would be raised daily from 9am to 7pm through the deinstallation of the ostrich exhibit;It appeared that the screens had not been properly programmed for the ostrich chicks and remained down for the most part, each day. Thus shade deployment is unreli…
2012-06-20	2012	6	summer	930		0								MEF	Beginnig 6/7 - In order to provide more natural light for the baby ostriches it was decided that the north and central sections of the west screens would be raised daily from 9am to 7pm through the deinstallation of the ostrich exhibit;It appeared that the screens had not been properly programmed for the ostrich chicks and remained down for the most part, each day. Thus shade deployment is unreli…
2012-06-21	2012	6	summer	830		0								MEF	Beginnig 6/7 - In order to provide more natural light for the baby ostriches it was decided that the north and central sections of the west screens would be raised daily from 9am to 7pm through the deinstallation of the ostrich exhibit;It appeared that the screens had not been properly programmed for the ostrich chicks and remained down for the most part, each day. Thus shade deployment is unreli…
2012-06-22	2012	6	summer	900		0								MEF	Beginnig 6/7 - In order to provide more natural light for the baby ostriches it was decided that the north and central sections of the west screens would be raised daily from 9am to 7pm through the deinstallation of the ostrich exhibit;It appeared that the screens had not been properly programmed for the ostrich chicks and remained down for the most part, each day. Thus shade deployment is unreli…
2012-06-23	2012	6	summer	845		0								CCO	Beginnig 6/7 - In order to provide more natural light for the baby ostriches it was decided that the north and central sections of the west screens would be raised daily from 9am to 7pm through the deinstallation of the ostrich exhibit;It appeared that the screens had not been properly programmed for the ostrich chicks and remained down for the most part, each day. Thus shade deployment is unreli…
2012-06-25	2012	6	summer	830		0								MEF	Beginnig 6/7 - In order to provide more natural light for the baby ostriches it was decided that the north and central sections of the west screens would be raised daily from 9am to 7pm through the deinstallation of the ostrich exhibit;It appeared that the screens had not been properly programmed for the ostrich chicks and remained down for the most part, each day. Thus shade deployment is unreli…
2012-06-26	2012	6	summer	900		0								MEF	Beginnig 6/7 - In order to provide more natural light for the baby ostriches it was decided that the north and central sections of the west screens would be raised daily from 9am to 7pm through the deinstallation of the ostrich exhibit;It appeared that the screens had not been properly programmed for the ostrich chicks and remained down for the most part, each day. Thus shade deployment is unreli…
2012-06-27	2012	6	summer	800		0								MEF	Beginnig 6/7 - In order to provide more natural light for the baby ostriches it was decided that the north and central sections of the west screens would be raised daily from 9am to 7pm through the deinstallation of the ostrich exhibit;It appeared that the screens had not been properly programmed for the ostrich chicks and remained down for the most part, each day. Thus shade deployment is unreli…
2012-06-28	2012	6	summer	1237	Dead	1	Selasphorus sasin	Selasphorus	sasin	M	HY	north	Exit door, front entrance	Ernest Parkes		not cataloged	CCO265	M	HY		By plumage
2012-06-28	2012	6	summer	800		0								MEF	Beginnig 6/7 - In order to provide more natural light for the baby ostriches it was decided that the north and central sections of the west screens would be raised daily from 9am to 7pm through the deinstallation of the ostrich exhibit;It appeared that the screens had not been properly programmed for the ostrich chicks and remained down for the most part, each day. Thus shade deployment is unreli…
2012-06-29	2012	6	summer	815		0								MEF
2012-06-30	2012	6	summer	900		0								CCO
2012-07-02	2012	7	summer	845		0								MEF
2012-07-03	2012	7	summer	840		0								MEF
2012-07-05	2012	7	summer	110	Dead	1	Calypte anna	Calypte	anna	M	IMM	Staff entrance	staff entrance	CCO	Hit window, DOA	not cataloged	CCO269	M	HY
2012-07-05	2012	7	summer	115	Dead	1	Calypte anna	Calypte	anna	U	HY	north	Front entrance	Elise Ricard		not cataloged	CCO493	F	HY
2012-07-05	2012	7	summer	900		0								MEF
2012-07-06	2012	7	summer	850		0								MEF
2012-07-07	2012	7	summer	845		0								CCO
2012-07-09	2012	7	summer	900		0								MEF
2012-07-10	2012	7	summer	700		0								MEF
2012-07-11	2012	7	summer	830		0								MEF
2012-07-12	2012	7	summer	730		0								MEF
2012-07-13	2012	7	summer	900		0								CCO
2012-07-14	2012	7	summer	900		0								CCO
2012-07-17	2012	7	summer	715		0								MEF
2012-07-18	2012	7	summer	1230	Dead	1	Melospiza melodia	Melospiza	melodia	U	HY	Staff entrance	staff entrance	Andrea Herrera, Christina Cordova		not cataloged	CEC058	U	HY
2012-07-18	2012	7	summer	700		0								MEF
2012-07-20	2012	7	summer	900		0								CCO
2012-07-21	2012	7	summer	1000	Dead	1	Euphagus cyanocephalus	Euphagus	cyanocephalus	M	AD	west	West Garden	Miao Liu (CAS custodian)	CAS guests saw 2 birds hit window, gave to Miao Liu who gave to Brian Simison. One bird (juvenile M)still alive, released.	not cataloged	AMS017	M	A	50% oss	Prep book says skull 50% ossified (should be questioned), but plumage is A M, not HY.
2012-07-21	2012	7	summer	1215	Dead	1	Calypte anna	Calypte	anna			north	front entrance	Todd Quackerbush (sp?)	hit glass window general admission door	not cataloged	CCO489	M	HY
2012-07-21	2012	7	summer	1000	Alive	1	Euphagus cyanocephalus	Euphagus	cyanocephalus	M	AD	west	West Garden	Miao Liu (CAS custodian)	CAS guests saw 2 birds hit window, gave to Miao Liu who gave to Brian Simison. One bird (juvenile M)still alive, released.			M	HY
2012-07-23	2012	7	summer	800		0								MEF
2012-07-24	2012	7	summer	745		0								MEF
2012-07-25	2012	7	summer	735		0								MEF
2012-07-27	2012	7	summer	900		0								CCO
2012-07-28	2012	7	summer	845		0								CCO
2012-07-29	2012	7	summer	900		0								LCW
2012-07-30	2012	7	summer	900		0								MEF
2012-07-31	2012	7	summer	845		0								MEF
2012-08-01	2012	8	summer	830		0								MEF
2012-08-02	2012	8	summer	525	Dead	1	Calypte anna	Calypte	anna			west	West Garden	Ernest Parker		not cataloged	CCO492	F	HY
2012-08-02	2012	8	summer	835		0								MEF
2012-08-03	2012	8	summer	1400	dead	1	Selasphorus sasin	Selasphorus	sasin			north	front entrance	Ricardo		not cataloged	CCO495	M	HY		added by EJC using CCO prep notebook
2012-08-03	2012	8	summer	850		0								CCO
2012-08-04	2012	8	summer	850		0								CCO
2012-08-05	2012	8	summer	845		0								LCW
2012-08-06	2012	8	summer	835		0								MEF
2012-08-07	2012	8	summer	840		0								MEF
2012-08-08	2013	4	spring	1020	dead	1	Selasphorus sasin	Selasphorus	sasin	north	front doors	north	front entrance	Ernest Parker		not cataloged	CCO494	M	HY		added by EJC using CCO prep notebook
2012-08-08	2012	8	summer	830		0								MEF
2012-08-09	2012	8	summer	900		0								MEF
2012-08-10	2012	8	summer	830		0								LCW
2012-08-11	2012	8	summer	845		0								CCO
2012-08-12	2012	8	summer	850		0								LCW
2012-08-13	2012	8	summer	850		0								LCW
2012-08-14	2012	8	summer	840		0								MEF
2012-08-15	2012	8	summer	830		0								LCW
2012-08-16	2012	8	summer	840		0								MEF
2012-08-17	2012	8	summer	830		0								MEF
2012-08-19	2012	8	summer	900		0								LCW
2012-08-20	2012	8	summer	840		0								LCW
2012-08-21	2012	8	summer	1100		0								MEF
2012-08-22	2012	8	summer	1200	Dead	1	Setophaga petechia	Setophaga	petechia	F	AHY?	Staff entrance	staff entrance	Gerber Ramirez		not cataloged	LCW494	U	HY
2012-08-22	2012	8	summer	900		0								MEF
2012-08-24	2012	8	summer	945		0								LCW
2012-08-25	2012	8	summer	900		0								CCO
2012-08-26	2012	8	summer	900		0								LCW
2012-08-29	2012	8	summer	200		0								CCO
2012-08-30	2012	8	summer	100		0								CCO
2012-08-31	2012	8	summer	900		0								CCO
2012-09-01	2012	9	fall	900		0								CCO
2012-09-02	2012	9	fall	955	Dead	1	Setophaga petechia	Setophaga	petechia	F		north	Front concourse	Tanea Tolbert		not cataloged	LCW502	U	HY
2012-09-03	2012	9	fall	1000		0								LCW
2012-09-04	2012	9	fall	830		0								LCW
2012-09-05	2012	9	fall	1100	Dead	1	Columba livia	Columba	livia			Staff entrance	business reception	Anne Reid	bill looks weird - upper mandible seems to be smaller than lower (unless it just froze in a strange position)	not cataloged	CCO366	U	U
2012-09-07	2012	9	fall	100	Dead	1	Euphagus cyanocephalus	Euphagus	cyanocephalus	M		north	Front lobby	Xavier Zamudio		not cataloged	NAM080	M	HY	25% oss
2012-09-07	2012	9	fall	830		0								LCW
2012-09-08	2012	9	fall	900		0								CCO
2012-09-09	2012	9	fall	900		0								LCW
2012-09-10	2012	9	fall	830		0								MEF
2012-09-11	2012	9	fall	830		0								LCW
2012-09-12	2012	9	fall	900		0								MEF
2012-09-13	2012	9	fall	1730	Dead	1	Setophaga petechia	Setophaga	petechia	F	?	B2	B2West outside Entomology	Stan Blum		not cataloged	JW016	U	U
2012-09-13	2012	9	fall	845		0								MEF
2012-09-14	2012	9	fall	830		0								LCW
2012-09-16	2012	9	fall	900		0								LCW
2012-09-17	2012	9	fall	950	Dead	1	Agelaius phoenicus	Agelaius	phoenicus		IMM	north	Front concourse	Carl Lieb, Guest services		not cataloged	LCW582	F	HY		Agelaius phoenicus, not Euphagus cyanocephalus.
2012-09-17	2012	9	fall	735		0								MEF
2012-09-18	2012	9	fall	830		0								LCW
2012-09-19	2012	9	fall	830		0								MEF
2012-09-20	2012	9	fall	1704	Dead	1	Calypte anna	Calypte	anna	M	IMM	north	Front door	Ernest Parker		not cataloged	CCO490	M	HY
2012-09-20	2012	9	fall	800		0								MEF
2012-09-21	2012	9	fall	800		0								MEF
2012-09-22	2012	9	fall	855		0								CCO
2012-09-23	2012	9	fall	900		0								LCW
2012-09-25	2012	9	fall	815		0								LCW
2012-09-27	2012	9	fall	800		0								MEF
2012-09-28	2012	9	fall	700		0								MEF
2012-09-29	2012	9	fall	900		0								LCW
2012-09-30	2012	9	fall	905		0								CCO
2012-10-01	2012	10	fall	1225	Dead	1	Calypte anna	Calypte	anna	M	AHY?	north	Front concourse	Tanea Tolbert, Guest Services		not cataloged	CCO491	M	A
2012-10-01	2012	10	fall	730		0								MEF
2012-10-02	2012	10	fall	830		0								LCW
2012-10-03	2012	10	fall	435	Dead	1	Setophaga petechia	Setophaga	petechia	F		west	West Garden	Carl Lieber (Ground Services)		not cataloged	LCW576	U	U
2012-10-05	2012	10	fall	830		0								LCW
2012-10-06	2012	10	fall	1600	Dead	1	Calypte anna	Calypte	anna			Staff entrance	Business reception	Rob Ronconi		not cataloged	CCO394	M	HY		aged by plumage 8/8/2014
2012-10-07	2012	10	fall	850		0								LCW
2012-10-08	2012	10	fall	900		0								MEF
2012-10-09	2012	10	fall	730		0								MEF
2012-10-10	2012	10	fall	800		0								MEF
2012-10-12	2012	10	fall	1100		0								LCW
2012-10-13	2012	10	fall	855		0								CCO
2012-10-14	2012	10	fall	900		0								LCW
2012-10-15	2012	10	fall	745		0								MEF
2012-10-16	2012	10	fall	830		0								LCW
2012-10-17	2012	10	fall	835	Dead	1	Melospiza lincolnii	Melospiza	lincolnii	U	U	north	Front concourse	Carl Lieber (Guest Services)		not cataloged	LCW539	M	HY		Bill 50% ossified.
2012-10-17	2012	10	fall	1530	Dead	1	Calypte anna	Calypte	anna	M	AHY?	Staff entrance	business reception	Christina Cordova		not cataloged	LCW555	M	A
2012-10-17	2012	10	fall	1030		0								MEF
2012-10-18	2012	10	fall	1100	Dead	1	Calypte anna	Calypte	anna	M	AHY?	west	West Garden	Freeland Dunker and Aquarium Staff		not cataloged	CCO369	M	A
2012-10-18	2012	10	fall	745		0								MEF
2012-10-19	2012	10	fall	830		0								LCW
2012-10-21	2012	10	fall	1310	Dead	1	Calypte anna	Calypte	anna			Staff entrance	Staff entrance	LCW	Was on top of trash can outside of staff entrance doors. Likely hit staff entrance windows.	not cataloged	CCO384	M	HY		aged by plumage 8/8/2014
2012-10-21	2012	10	fall	900		0								LCW
2012-10-22	2012	10	fall	830		0								MEF
2012-10-23	2012	10	fall	830		0								LCW
2012-10-24	2012	10	fall	845		0								MEF
2012-10-25	2012	10	fall	800		0								MEF
2012-10-26	2012	10	fall	930		0								LCW
2012-10-27	2012	10	fall	1000		0								CCO
2012-10-28	2012	10	fall	845		0								LCW
2012-10-29	2012	10	fall	915		0								MEF
2012-10-30	2012	10	fall	1330	Dead	1	Calypte anna	Calypte	anna	M	HY?	Staff entrance	business reception	Kadee Barrett		not cataloged	CCO393	M	HY		aged by plumage 8/8/2014
2012-10-30	2012	10	fall	830		0								LCW
2012-11-01	2012	11	fall	800		0								MEF
2012-11-02	2012	11	fall	1020	Dead	1	Calypte anna	Calypte	anna	M	IMM	north	Front doors (#2)	Kathleen Bonner		not cataloged	CCO385	M	HY		aged by plumage 8/8/2014
2012-11-02	2012	11	fall	830		0								LCW
2012-11-03	2012	11	fall	900		0								LCW
2012-11-04	2012	11	fall	905		0								CCO
2012-11-05	2012	11	fall	700	Dead	1	Melospiza lincolnii	Melospiza	lincolnii	U	U	north	Front concourse	Custodial		not cataloged	LCW591	M	HY	Skull 25% ossified.
2012-11-05	2012	11	fall	745		0								MEF
2012-11-06	2012	11	fall	810		0								LCW
2012-11-07	2012	11	fall	735		0								MEF
2012-11-08	2012	11	fall	800		0								MEF
2012-11-09	2012	11	fall	830		0								LCW
2012-11-10	2012	11	fall	855		0								CCO
2012-11-11	2012	11	fall	900		0								LCW
2012-11-12	2012	11	fall	810		0								LCW
2012-11-14	2012	11	fall	835	Dead	1	Calypte anna	Calypte	anna	M	AD	north	Front concourse	Carl Lieber (Guest Services)		not cataloged	LCW554	M	A
2012-11-14	2012	11	fall	800		0								MEF
2012-11-15	2012	11	fall	1550	Dead	1	Euphagus cyanocephalus	Euphagus	cyanocephalus	F		west	West Garden	Beatriz Zaldiver (Security)		not cataloged	CCO380	F	U		Ovary measured during prep
2012-11-15	2012	11	fall	1015		0								LCW
2012-11-17	2012	11	fall	900		0								CCO
2012-11-18	2012	11	fall	900		0								LCW
2012-11-19	2012	11	fall	800		0								LCW
2012-11-20	2012	11	fall	900		0								MEF
2012-11-21	2012	11	fall	815		0								MEF
2012-11-22	2012	11	fall	HOLIDAY - CLOSED										HOLIDAY - CLOSED
2012-11-23	2012	11	fall	HOLIDAY - NO O&M STAFF										HOLIDAY - NO O&M STAFF
2012-11-24	2012	11	fall	955		0								CCO
2012-11-25	2012	11	fall	900		0								LCW
2012-11-26	2012	11	fall	1600	Dead	1	Euphagus cyanocephalus	Euphagus	cyanocephalus	M	?	west	West Garden	Rob Ronconi	Found behind a garbage can, already partly decomposed.	not cataloged	KJO049	U	U	100% oss
2012-11-26	2012	11	fall	845		0								MEF
2012-11-27	2012	11	fall	825		0								LCW
2012-12-21	2012	12	winter	unknown	dead	1	Setophaga coronata	Setophaga	coronata			west	west garden	Vikki McCloskey		not cataloged	CCO404	M	U
2013-01-01	2013	1	winter	1020		0								LCW
2013-01-02	2013	1	winter	830		0								LCW
2013-01-02	2013	1	winter	845		0								CCO
2013-01-03	2013	1	winter	830		0								MEF
2013-01-04	2013	1	winter	840		0								MEF
2013-01-05	2013	1	winter	855		0								CCO
2013-01-06	2013	1	winter	850		0								CCO
2013-01-07	2013	1	winter	820		0								LCW
2013-01-08	2013	1	winter	845		0								MEF
2013-01-09	2013	1	winter	930		0								MEF
2013-01-10	2013	1	winter	830		0								MEF
2013-01-12	2013	1	winter	840		0								CCO
2013-01-13	2013	1	winter	900		0								LCW
2013-01-14	2013	1	winter	830		0								LCW
2013-01-15	2013	1	winter	845		0								MEF
2013-01-16	2013	1	winter	930		0								MEF
2013-01-17	2013	1	winter	740		0								MEF
2013-01-18	2013	1	winter	850		0								MEF
2013-01-19	2013	1	winter	1045		0								CCO
2013-01-20	2013	1	winter	900		0								LCW
2013-01-22	2013	1	winter	830		0								MEF
2013-01-23	2013	1	winter	855		0								CCO
2013-01-24	2013	1	winter	825		0								MEF
2013-01-26	2013	1	winter	845		0								CCO
2013-01-27	2013	1	winter	900		0								LCW
2013-01-28	2013	1	winter	825		0								MEF
2013-01-29	2013	1	winter	805		0								MEF
2013-01-30	2013	1	winter	905		0								CCO
2013-02-01	2013	2	winter	830		0								LCW
2013-02-02	2013	2	winter	945		0								CCO
2013-02-03	2013	2	winter	900		0								LCW
2013-02-04	2013	2	winter	830		0								LCW
2013-02-06	2013	2	winter	845		0								CCO
2013-02-07	2013	2	winter	840		0								MEF
2013-02-08	2013	2	winter	830		0								LCW
2013-02-09	2013	2	winter	845		0								CCO
2013-02-10	2013	2	winter	900		0								LCW
2013-02-11	2013	2	winter	845		0								LCW
2013-02-12	2013	2	winter	840		0								MEF
2013-02-13	2013	2	winter	855		0								CCO
2013-02-14	2013	2	winter	820		0								MEF
2013-02-15	2013	2	winter	830		0								LCW
2013-02-16	2013	2	winter	900		0								LCW
2013-02-17	2013	2	winter	855		0								CCO
2013-02-18	2013	2	winter	840		0								CCO
2013-02-19	2013	2	winter	830		0								MEF
2013-02-20	2013	2	winter	845		0								CCO
2013-02-21	2013	2	winter	145		0								CCO
2013-02-22	2013	2	winter	840		0								LCW
2013-02-23	2013	2	winter	845		0								CCO
2013-02-24	2013	2	winter	900		0								LCW
2013-02-25	2013	2	winter	830		0								LCW
2013-02-27	2013	2	winter	933	Dead	1	Catharus guttatus	Catharus	guttatus			B2	B2 East window, by CUP entrance	Omar McCutcheon (CAS engineering)	stuck to concrete, partially degraded	not cataloged	AMS021	U	A	90% oss - skeletal prep
2013-02-27	2013	2	winter	850		0
2013-02-28	2013	2	winter	800		0								MEF
2013-03-01	2013	3	spring	830		0								LCW
2013-03-02	2013	3	spring	855		0								CCO
2013-03-03	2013	3	spring	855		0								LCW
2013-03-04	2013	3	spring	840		0								LCW
2013-03-05	2013	3	spring	800		0								MEF
2013-03-06	2013	3	spring	810		0								MEF
2013-03-07	2013	3	spring	830		0								MEF
2013-03-08	2013	3	spring	830		0								LCW
2013-03-10	2013	3	spring	905		0								CCO
2013-03-11	2013	3	spring	840		0								LCW
2013-03-13	2013	3	spring	900		0								CCO
2013-03-14	2013	3	spring	815		0								MEF
2013-03-15	2013	3	spring	830		0								LCW
2013-03-16	2013	3	spring	850		0								CCO
2013-03-17	2013	3	spring	900		0								LCW
2013-03-18	2013	3	spring	830		0								LCW
2013-03-19	2013	3	spring	830		0								MEF
2013-03-20	2013	3	spring	850		0								CCO
2013-03-21	2013	3	spring	830		0								MEF
2013-03-22	2013	3	spring	830		0								LCW
2013-03-23	2013	3	spring	845		0								CCO
2013-03-24	2013	3	spring	900		0								LCW
2013-03-25	2013	3	spring	1745	Dead	1	Carpodacus mexicanus	Carpodacus	mexicanus	F	AHY	Staff entrance	Staff Entrance	Jens Vindum		not cataloged	MK1164	F	A	date wrong in spreadsheet, corrected 8/5/2014
2013-03-25	2013	3	spring	835		0								LCW
2013-03-27	2013	3	spring	900		0								CCO
2013-03-29	2013	3	spring	830		0								LCW
2013-03-30	2013	3	spring	905		0								CCO
2013-03-31	2013	3	spring	1054	Dead	1	Certhia americana	Certhia	americana			north	Front doors	Steven Harris		not cataloged	CCO482	M	A
2013-03-31	2013	3	spring	900		0								LCW
2013-04-01	2013	4	spring	830		0								LCW
2013-04-02	2013	4	spring	830		0								MEF
2013-04-03	2013	4	spring	900		0								CCO
2013-04-04	2013	4	spring	805		0								MEF
2013-04-05	2013	4	spring	840		0								LCW
2013-04-06	2013	4	spring	855		0								CCO
2013-04-07	2013	4	spring	850		0								LCW
2013-04-08	2013	4	spring	830		0								LCW
2013-04-09	2013	4	spring	730		0								MEF
2013-04-10	2013	4	spring	855		0								CCO
2013-04-11	2013	4	spring	835		0								MEF
2013-04-12	2013	4	spring	830		0								LCW
2013-04-13	2013	4	spring	900		0								LCW
2013-04-14	2013	4	spring	905		0								CCO
2013-04-16	2013	4	spring	645		0								MEF
2013-04-17	2013	4	spring	900		0								CCO
2013-04-20	2013	4	spring	900		0								LCW
2013-04-21	2013	4	spring	850		0								CCO
2013-04-22	2013	4	spring	745		0								MEF
2013-04-24	2013	4	spring	900		0								CCO
2013-04-25	2013	4	spring	205		0								CCO
2013-04-26	2013	4	spring	830		0								LCW
2013-04-27	2013	4	spring	840		0								CCO
2013-04-28	2013	4	spring	900		0								LCW
2013-04-29	2013	4	spring	825		0								LCW
2013-04-30	2013	4	spring	805		0								MEF
2013-05-01	2013	5	spring	800		0								CCO
2013-05-04	2013	5	spring	845		0								CCO
2013-05-06	2013	5	spring	830		0								LCW
2013-05-07	2013	5	spring	835		0								MEF
2013-05-08	2013	5	spring	830		0								CCO
2013-05-09	2013	5	spring	805		0								MEF
2013-05-10	2013	5	spring	830		0								LCW
2013-05-10	2013	5	spring	1000	alive	1	Melospiza melodia	Melospiza	melodia	U	U	B2	southside, B2 central	Michele Esposito reported it	Picked up alive and put in a box for Freeland to monitor, released successfully at 12:00pm			U	U
2013-05-11	2013	5	spring	850		0								CCO
2013-05-12	2013	5	spring	900		0								LCW
2013-05-12	2013	5	spring	1830	alive	1	Carpodacus mexicanus	Carpodacus	mexicanus	M	AHY	Staff entrance	business entrance	Lee Post	found stunned next to window, flew off when picked up			M	A
2013-05-13	2013	5	spring	830		0								LCW
2013-05-14	2013	5	spring	815		0								MEF
2013-05-15	2013	5	spring	850		0								CCO
2013-05-15	2013	5	spring	1450	alive	1	Unknown	Unknown				north	main lobby windows	Guest services	Reception called to say that a bird had hit the windows in the main lobby but was still alive - Freeland dealt with it.
2013-05-18	2013	5	spring	900	Dead	1	Selasphorus sasin	Selasphorus	sasin			east	East garden	CCO	shades closed at time of survey, bird found on table	not cataloged	CCO536	F	A	aged using Pyle 8/8/2014 LQK
2013-05-19	2013	5	spring	850		0								CCO
2013-05-20	2013	5	spring	1736	Dead	1	Carpodacus mexicanus	Carpodacus	mexicanus	U	U	west	West garden	Rob Ronconi, Rey Ramos	Either F or HY bird	not cataloged	LCW703	U	HY
2013-05-22	2013	5	spring	850		0								CCO
2013-05-23	2013	5	spring	1300	Dead	1	Junco hyemalis	Junco	hyemalis	U	HY	B2	Outside Arachnology Lab	Anthea Carmichael		not cataloged	LCW708	M	HY	sex/age at prep entered 8/5/14
2013-05-23	2013	5	spring	830		0								LCW
2013-05-24	2013	5	spring	930	Dead	1	Calypte anna	Calypte	anna			Staff entrance	employee entrance	Debi Espinoza-Bylin (Public programs)		not cataloged	CCO537	M	HY	sex/age at prep entered 8/5/14, aged using Pyle 8/8/2014 LQK
2013-05-24	2013	5	spring	830		0								LCW
2013-05-25	2013	5	spring	905		0								CCO
2013-05-26	2013	5	spring	900		0								LCW
2013-05-27	2013	5	spring	unknown	Dead	1	Selasphorus sasin	Selasphorus	sasin	M	AHY	north	front entrance	unknown (FD written on bag)		not cataloged	LCW723	M	A	sex/age at prep entered 8/5/14
2013-05-27	2013	5	spring	unknown	Dead	1	Junco hyemalis	Junco	hyemalis	M	AHY	B2	southside	Codie Otte	not entered in orginal spreadsheet	not cataloged	MK1167	U	HY	not entered in original spreadsheet
2013-05-30	2013	5	spring	845		0								MEF
2013-05-31	2013	5	spring	830		0								LCW
2013-06-01	2013	6	summer	905		0								CCO
2013-06-02	2013	6	summer	900		0								LCW
2013-06-05	2013	6	summer	900		0								CCO
2013-06-06	2013	6	summer	830		0								LCW
2013-06-08	2013	6	summer	900		0								CCO
2013-06-09	2013	6	summer	900		0								LCW
2013-06-10	2013	6	summer	830		0								LCW
2013-06-11	2013	6	summer	840		0								LCW
2013-06-14	2013	6	summer	850		0								CCO
2013-06-15	2013	6	summer	900		0								LCW
2013-06-16	2013	6	summer	900		0								CCO
2013-06-17	2013	6	summer	830		0								MEF
2013-06-18	2013	6	summer	830		0								MEF
2013-06-19	2013	6	summer	1249	Dead	1	Junco hyemalis	Junco	hyemalis	U	HY	B2	B2 West window	LCW & CCO	spotted walking back from lunch	not cataloged	LCW729	M	HY	sex/age at prep entered 8/5/14
2013-06-19	2013	6	summer	855		0								CCO
2013-06-20	2013	6	summer	830		0								MEF
2013-06-21	2013	6	summer	1400	alive	1	Buteo jamaicensis	Buteo	jamaicensis	U	HY	B2	B2 West window	Freeland Dunker	found sitting down in the corner of B2W may have hit window but not known exactly, Freeland transferred to Peninsula Humane Society.			U	HY
2013-06-22	2013	6	summer	845		0								CCO
2013-06-24	2013	6	summer	845		0								LCW
2013-06-25	2013	6	summer	830		0								LCW
2013-06-26	2013	6	summer	835		0								CCO
2013-06-27	2013	6	summer	845		0								MEF
2013-06-27	2013	6	summer	930	alive	1	Buteo jamaicensis	Buteo	jamaicensis	U	HY	Staff entrance	Staff Entrance	Beth Goldstein	Flew into window with rat in tow. Dropped rat and then flew off with a second RTHA.			U	HY
2013-06-28	2013	6	summer	1830	Dead	1	Euphagus cyanocephalus	Euphagus	cyanocephalus	U	HY?	north	Main Lobby	Ricardo Guido		not cataloged	LCW730	F	HY	sex/age at prep entered 8/5/14
2013-06-30	2013	6	summer	855		0								LCW
2013-07-01	2013	7	summer	830	Dead	1	Sayornis nigricans	Sayornis	nigricans	U	HY	north	Front Entrance	Tina Liang (Custodial)	found dead and given to custodial	not cataloged	LCW739	F	HY	sex/age at prep entered 8/5/14
2013-07-01	2013	7	summer	850		0								LCW
2013-07-02	2013	7	summer	815		0								LCW
2013-07-03	2013	7	summer	800		0								CCO
2013-07-06	2013	7	summer	1530	Dead	1	Selasphorus sasin	Selasphorus	sasin	F?	AHY?	north	Front concourse	Joe Lerma		not cataloged	LCW831	F	HY	species/age/sex identified during prep, updated 8/5/14
2013-07-06	2013	7	summer	900		0								LCW
2013-07-07	2013	7	summer	855		0								LCW
2013-07-08	2013	7	summer	1117	Dead	1	Sayornis nigricans	Sayornis	nigricans	U	HY	north	Front concourse	Guest services		not cataloged	LCW765	M	HY	sex/age at prep entered 8/5/14
2013-07-08	2013	7	summer	825		0								LCW
2013-07-09	2013	7	summer	825		0								LCW
2013-07-12	2013	7	summer	900		0								CCO
2013-07-13	2013	7	summer	900		0								CCO
2013-07-14	2013	7	summer	900		0								LCW
2013-07-15	2013	7	summer	845		0								LCW
2013-07-16	2013	7	summer	1155	Dead	1	Calypte anna	Calypte	anna	U	U	Staff entrance	Service desk	Carl		not cataloged	CCO644	F	HY	need to check skin for age/sex 8/5/14, aged using Pyle 8/8/2014 LQK
2013-07-16	2013	7	summer	730		0								LCW
2013-07-17	2013	7	summer	900		0								CCO
2013-07-18	2013	7	summer	806	Dead	1	Carpodacus mexicanus	Carpodacus	mexicanus	U	U	Staff entrance	Back entrance doors	Gerber Ramirez		not cataloged	LCW766	F	A	sex/age at prep entered 8/5/14
2013-07-19	2013	7	summer	900		0								CCO
2013-07-20	2013	7	summer	900		0								LCW
2013-07-21	2013	7	summer	900		0								CCO
2013-07-22	2013	7	summer	835		0								LCW
2013-07-23	2013	7	summer	825		0								LCW
2013-07-23	2013	7	summer	925	alive	1	Charadrius vociferus	Charadrius	vociferus	U	HY	north	front entrance	Carl Lieber	Bird hit glass near the GA door #1. The bird was not 86’d so Carl put the glove on and took the bird over to a secluded area near the East Garden. By the time he had placed the bird down it was standing on its own. He checked about an hour later and it was gone.			U	HY
2013-07-24	2013	7	summer	845		0								CCO
2013-07-25	2013	7	summer	845		0								MEF
2013-07-26	2013	7	summer	900		0								MEF
2013-07-28	2013	7	summer	855		0								CCO
2013-07-29	2013	7	summer	1340	Dead	1	Selasphorus sp.	Selasphorus	sp.			north	Front doors	Bryce Harris		not cataloged	LCW824	F	HY	sex/age at prep entered 8/5/14
2013-07-29	2013	7	summer	835		0								LCW
2013-07-30	2013	7	summer	1230	Dead	1	Selasphorus sasin	Selasphorus	sasin	M	HY	Staff entrance	Staff Entrance	MEF	reported to MEF by AQ (Eric Hupperts)	not cataloged	LCW830	M	HY	sex/age at prep entered 8/5/14
2013-07-30	2013	7	summer	825		0								LCW
2013-07-31	2013	7	summer	1300	Dead	1	Calypte anna	Calypte	anna	M?	HY?	west	West Garden	Avi		not cataloged	LCW832	F	HY	sex/age at prep entered 8/5/14
2013-07-31	2013	7	summer	900		0								CCO
2013-08-01	2013	8	summer	845		0								MEF
2013-08-02	2013	8	summer	900		0								CCO
2013-08-03	2013	8	summer	900		0								LCW
2013-08-04	2013	8	summer	855		0								CCO
2013-08-05	2013	8	summer	830		0								LCW
2013-08-06	2013	8	summer	2330	Dead	1	Calypte anna	Calypte	anna	U	U	north	front entrance	Rob Ronconi	Rob picked up the carcass on his way home, waiting for him to bring it back in to CAS (8/7) 8/12 Rob confirmed that carcass is no longer in his freezer			U	U	emailed Rob Ronconi to bring in specimen
2013-08-07	2013	8	summer	1020		0								CCO
2013-08-08	2013	8	summer	825		0								MEF
2013-08-09	2013	8	summer	900	Dead	1	Junco hyemalis	Junco	hyemalis	U	HY	north	Front entrance	Clint (Custodial)		not cataloged	LCW833	M	HY	sex/age at prep entered 8/5/14
2013-08-09	2013	8	summer	855		0								CCO
2013-08-10	2013	8	summer	855		0								CCO
2013-08-11	2013	8	summer	1000		0								MEF
2013-08-12	2013	8	summer	825		0								LCW
2013-08-13	2013	8	summer	835		0								LCW
2013-08-14	2013	8	summer	850		0								MEF
2013-08-16	2013	8	summer	910		0								CCO
2013-08-18	2013	8	summer	855		0								LCW
2013-08-19	2013	8	summer	825		0								LCW
2013-08-21	2013	8	summer	855		0								CCO
2013-08-23	2013	8	summer	900	Dead	1	Turdus migratorius	Turdus	migratorius	F		B2	B2 west window	CCO		not cataloged	LCW834	F	HY	skeletal prep? Ask LCW
2013-08-24	2013	8	summer	900		0								CCO
2013-08-25	2013	8	summer	900		0								LCW
2013-08-26	2013	8	summer	820		0								LCW
2013-08-27	2013	8	summer	830		0								LCW
2013-08-28	2013	8	summer	900		0								CCO
2013-08-29	2013	8	summer	900		0								MEF
2013-09-01	2013	9	fall	900		0								LCW
2013-09-03	2013	9	fall	930		0								MEF
2013-09-04	2013	9	fall	1110	Dead	1	Calypte anna	Calypte	anna	M?	HY?	north	Front doors	Pat Bird		not cataloged	CCO632	M	HY	sex/age at prep entered 8/5/14, aged using Pyle 8/8/2014 LQK
2013-09-04	2013	9	fall	900		0								MEF
2013-09-05	2013	9	fall	845		0								MEF
2013-09-06	2013	9	fall	1100		0								MEF
2013-09-09	2013	9	fall	830		0								MEF
2013-09-10	2013	9	fall	830		0								MEF
2013-09-12	2013	9	fall	200		0								CCO
2013-09-14	2013	9	fall	845		0								CCO
2013-09-15	2013	9	fall	900		0								CCO	shades fully closed on south side of building
2013-09-17	2013	9	fall	1030	Dead	1	Setophaga townsendi	Setophaga	townsendi			B2	B2W windows	LCW	Reported by Roberta Brett. Partially rotting, stuck on ground - must not have spotted it during morning walk	not cataloged	LCW845	F	A	skeletal prep
2013-09-17	2013	9	fall	830		0								LCW
2013-09-18	2013	9	fall	900		0								CCO
2013-09-19	2013	9	fall	830		0								MEF
2013-09-20	2013	9	fall	815		0								MEF
2013-09-22	2013	9	fall	900		0								LCW
2013-09-23	2013	9	fall	830		0								LCW
2013-09-24	2013	9	fall	830		0								MEF
2013-09-25	2013	9	fall	845		0								CCO
2013-09-26	2013	9	fall	830		0								LCW
2013-09-27	2013	9	fall	845		0								MEF
2013-09-28	2013	9	fall	730	alive	1	Calypte anna	Calypte	anna	U	U	north	front doors	Clint (Custodial)	recovered and flew away			U	U
2013-09-28	2013	9	fall	900		0								CCO	shades down on south side of building, middle section of west garden blocked off for event.
2013-09-29	2013	9	fall	845	Dead	1	Empidonax difficilis	Empidonax	difficilis			B2	B2W windows	LCW	shades all open on south side of building	not cataloged	LCW851	M	HY	sex/age at prep entered 8/5/14
2013-09-30	2013	9	fall	820		0								LCW
2013-09-30	2013	9	fall	1130	alive	1	Unknown	Unknown		U	U	north	front doors	Freeland Dunker	Recovered and flew off before ID could be made			U	U
2013-10-01	2013	10	fall	830		0								MEF
2013-10-02	2013	10	fall	1123	Dead	1	Calypte anna	Calypte	anna	M	HY	north	front doors	Mako Shoemaker		not cataloged	CCO663	M	A	sex/age at prep entered 8/5/14
2013-10-02	2013	10	fall	900		0								MEF
2013-10-03	2013	10	fall	150		0								CCO
2013-10-04	2013	10	fall	1100	Dead	1	Vermivora celata	Vermivora	celata	U	U	B2	B2W windows	Christina Cordova		not cataloged	LCW868	F	HY	sex/age at prep entered 8/5/14
2013-10-05	2013	10	fall	1155	Dead	1	Calypte anna	Calypte	anna	M	U	north	front doors	Joe Lerma		not cataloged	LCW867	M	HY	check age with Pyle
2013-10-06	2013	10	fall	845		0								CCO
2013-10-07	2013	10	fall	835	Dead	1	Melospiza lincolnii	Melospiza	lincolnii	U	U	north	Front doors	Clint (Custodial)		not cataloged	CCO652	M	U	sex/age at prep entered 8/5/14	No info in prep book as to why HY bird, skull written as ossified so could be HY or could be A based on collection date.
2013-10-07	2013	10	fall	835		0								LCW
2013-10-08	2013	10	fall	840		0								LCW
2013-10-09	2013	10	fall	900		0								CCO
2013-10-10	2013	10	fall	830		0								LCW
2013-10-11	2013	10	fall	840		0								MEF
2013-10-12	2013	10	fall	850		0								CCO
2013-10-13	2013	10	fall	830	Dead	1	Calypte anna	Calypte	anna	M		north	Concourse	Ernest		not cataloged	CCO653	M	A	sex/age at prep entered 8/5/14
2013-10-13	2013	10	fall	900		0								LCW
2013-10-14	2013	10	fall	940		0								LCW
2013-10-16	2013	10	fall	855		0								CCO
2013-10-18	2013	10	fall	830		0								MEF
2013-10-21	2013	10	fall	840		0								MEF
2013-10-22	2013	10	fall	830		0								LCW
2013-10-23	2013	10	fall	900		0								CCO
2013-10-24	2013	10	fall	830		0								MEF
2013-10-25	2013	10	fall	830		0								LCW
2013-10-26	2013	10	fall	930		0								CCO
2013-10-27	2013	10	fall	1311	Dead	1	Calypte anna	Calypte	anna	U	U	north	Front doors	Mako Shoemaker (Guest Services)		not cataloged	LCW872	F	A	aged using Pyle 8/8/2014 LQK
2013-10-27	2013	10	fall	900		0								LCW
2013-10-28	2013	10	fall	825		0								LCW
2013-10-29	2013	10	fall	1530	Dead	1	Euphagus cyanocephalus	Euphagus	cyanocephalus	M	Ad	north	front doors	Albert Lee (Custodial)		not cataloged	CCO662	M	A	sex/age at prep entered 8/5/14
2013-10-29	2013	10	fall	825		0								LCW
2013-10-30	2013	10	fall	900		0								CCO
2013-10-31	2013	10	fall	830		0								LCW
2013-11-02	2013	11	fall	920		0								CCO
2013-11-03	2013	11	fall	855		0								LCW
2013-11-04	2013	11	fall	825		0								LCW
2013-11-06	2013	11	fall	950	Dead	1	Calypte anna	Calypte	anna	M		north	Front concourse	Walter Pizarro (Guest Services)		not cataloged	CCO681	M	A	sex/age at prep entered 8/5/14, aged using Pyle 8/8/2014 LQK
2013-11-06	2013	11	fall	1632	Dead	1	Calypte anna	Calypte	anna	M		north	Front concourse	Ernest Parker (Guest Services)		not cataloged	CCO682	M	A	sex/age at prep entered 8/5/14, aged using Pyle 8/8/2014 LQK
2013-11-06	2013	11	fall	855		0								CCO
2013-11-06	2013	11	fall	1130	alive	1	Calypte anna	Calypte	anna	?	?	north	Found in front garden sitting on the ground	Alan Goode	Could have hit the elevator glass			U	U
2013-11-07	2013	11	fall	815		0								LCW
2013-11-09	2013	11	fall	905		0								LCW
2013-11-10	2013	11	fall	850		0								CCO
2013-11-11	2013	11	fall	830		0								LCW
2013-11-13	2013	11	fall	905		0								CCO
2013-11-14	2013	11	fall	830		0								LCW
2013-11-15	2013	11	fall	845		0								MEF
2013-11-16	2013	11	fall	910		0								CCO
2013-11-17	2013	11	fall	910		0								LCW
2013-11-19	2013	11	fall	835		0								LCW
2013-11-21	2013	11	fall	1337	Dead	1	Calypte anna	Calypte	anna	F?	U	?	??	Guest services		not cataloged	CCO678	F	HY	sex/age at prep entered 8/5/14, aged using Pyle 8/8/2014 LQK
2013-11-21	2013	11	fall	830		0								LCW
2013-11-23	2013	11	fall	910		0								CCO
2013-11-25	2013	11	fall	830		0								MEF
2013-11-26	2013	11	fall	840		0								MEF
2013-11-27	2013	11	fall	830		0								MEF
2013-11-29	2013	11	fall	1000		0								LCW
2013-11-30	2013	11	fall	?	Dead	1	Calypte anna	Calypte	anna	F?	U	Staff entrance	Business entrance	CAS staff		not cataloged	CCO680	F	A	sex/age at prep entered 8/5/14
2013-11-30	2013	11	fall	905		0								CCO
2013-12-01	2013	12	winter	900		0								LCW
2013-12-02	2013	12	winter	825		0								LCW
2013-12-03	2013	12	winter	825		0								LCW
2013-12-04	2013	12	winter	855		0								CCO
2013-12-05	2013	12	winter	830		0								LCW
2013-12-07	2013	12	winter	900		0								CCO
2013-12-08	2013	12	winter	855		0								LCW
2013-12-09	2013	12	winter	830		0								LCW
2013-12-10	2013	12	winter	830	alive	1	Junco hyemalis	Junco	hyemalis	M	Ad	west	West garden	LCW	The Southmost corner door to the West garden was open and a Junco was inside the building. It repeatedly hit the windows trying to get out and flew up to the ceiling as I tried to flush it outside.			M	A
2013-12-11	2013	12	winter	859		0								CCO
2013-12-12	2013	12	winter	745		0								MEF
2013-12-13	2013	12	winter	830		0								MEF
2013-12-14	2013	12	winter	850		0								CCO
2013-12-15	2013	12	winter	900		0								LCW
2013-12-16	2013	12	winter	1615	Dead	1	Setophaga coronata	Setophaga	coronata	F?	U	B2	B2 East	Christina Piotrowski		not cataloged	CCO683	M	A	sex/age at prep entered 8/5/14
2013-12-16	2013	12	winter	800		0								CCO
2013-12-17	2013	12	winter	715		0								LCW
2013-12-18	2013	12	winter	900		0								CCO
2013-12-19	2013	12	winter	830		0								LCW
2013-12-21	2013	12	winter	900		0								CCO
2013-12-22	2013	12	winter	905		0								LCW
2013-12-23	2013	12	winter	845		0								MEF
2013-12-24	2013	12	winter	1001	Dead	1	Calypte anna	Calypte	anna	M	AHY?	north	music concourse	Clint (Custodial)		not cataloged	LCW888	M	A	sex/age at prep entered 8/5/14
2013-12-24	2013	12	winter	815		0								MEF
2013-12-26	2013	12	winter	800	Dead	1	Calypte anna	Calypte	anna			north	concourse	unknown no additional information on tag		not cataloged	LCW889	F	A	sex/age at prep entered 8/5/14
2013-12-26	2013	12	winter	855		0								MEF
2013-12-27	2013	12	winter	904		0								CCO
2013-12-28	2013	12	winter	900		0								CCO
2013-12-29	2013	12	winter	900		0								LCW
2013-12-30	2013	12	winter	825		0								LCW
2013-12-31	2013	12	winter	825		0								LCW
					355	355
					308
					47

## Sheet: main Datasheet PURGED--no alive
Date	Year	month	Season	time of survey	Mortality	# birds	Scientific name	genus	species	sex	age	Side	location	Collector/ Surveyor	disposition/ remarks	CAS #	Prep #	sex determined at prep	age determined at prep		Notes			Cleaned time of survey		900	1100	1300	1500	1700	1900	2100	2300
2011-09-22	2011	9	fall	640	Dead	1	Zenaida macroura	Zenaida	macroura	U	U	Staff entrance	soutside, reception entrance	Bob Villegas		not cataloged	CCO318	F	HY					640		1	0	0	0	0	0	0	0		1
2012-11-05	2012	11	fall	700	Dead	1	Melospiza lincolnii	Melospiza	lincolnii	U	U	north	Front concourse	Custodial		not cataloged	LCW591	M	HY		Skull 25% ossified.			700		1	0	0	0	0	0	0	0		1
2011-08-01	2011	8	summer	700	Dead	1	Zenaida macroura	Zenaida	macroura	U	U	north	Music Concourse	Custodial staff		not cataloged	CCO085	M	A					700		1	0	0	0	0	0	0	0		1
2009-04-06	2009	4	spring	700	Dead	1	Selasphorus sasin	Selasphorus	sasin	M	AD	north	frontside (northside)	Javier Perez		96922	PLG675	M	A					700		1	0	0	0	0	0	0	0		1
2009-09-01	2009	9	fall	800	dead	1	Calypte anna	Calypte	anna	M	U	west	west garden	C. Kang security		96919	PLG795	M	HY		added using online catalog & PLG prep notebook, aged 8/12/2014			800		1	0	0	0	0	0	0	0		1
2010-10-25	2010	10	fall	800	Dead	1	Catharus guttatus	Catharus	guttatus	U	U	east	East Garden	custodial		97643	MEF592	M	HY		age/sex updated from prep notes 8/8/2014			800		1	0	0	0	0	0	0	0		1
2009-11-10	2009	11	fall	800	Dead	1	Junco hyemalis	Junco	hyemalis	U	U	west	west garden	MEF		not cataloged	PLG848	F	U					800		1	0	0	0	0	0	0	0		1
2010-01-28	2010	1	winter	800	Dead	1	Passerella iliaca	Passerella	iliaca	U	U	west	westside	MEF	group of Brewer's Blackbirds standing around carcass	not cataloged	MK1105	M	A	100% oss				800		1	0	0	0	0	0	0	0		1
2010-02-05	2010	2	winter	800	Dead	1	Pipilo crissalis	Pipilo	crissalis	U	U	west	westside	MEF		not cataloged	MHM033	M	A					800		1	0	0	0	0	0	0	0		1
2013-12-26	2013	12	winter	800	Dead	1	Calypte anna	Calypte	anna			north	concourse	unknown no additional information on tag		not cataloged	LCW889	F	A	sex/age at prep entered 8/5/14				800		1	0	0	0	0	0	0	0		1
2011-10-25	2011	10	fall	800	Dead	1	Zonotrichia atricapilla	Zonotrichia	atricapilla	U	U	north	Front entrance	W. Woo	Security	not cataloged	LCW246	U	HY					800		1	0	0	0	0	0	0	0		1
2013-07-18	2013	7	summer	806	Dead	1	Carpodacus mexicanus	Carpodacus	mexicanus	U	U	Staff entrance	Back entrance doors	Gerber Ramirez		not cataloged	LCW766	F	A	sex/age at prep entered 8/5/14				806		1	0	0	0	0	0	0	0		1
2010-11-09	2010	11	fall	815	Dead	1	Calypte anna	Calypte	anna	M	U	north	front entrance	Billy	Guest Services	not cataloged	ASG265	M	A		mounted for Spring 2011 Exhibit; no date in ASG notes, card found in accession file and listed in original 2010 windowkill spreadsheet - deduced prep information and date			815		1	0	0	0	0	0	0	0		1
2010-10-05	2010	10	fall	815	Dead	1	Melospiza lincolnii	Melospiza	lincolnii	U	U	north	front entrance	Jens Vindum		not cataloged	ASG236	M	U					815		1	0	0	0	0	0	0	0		1
2010-02-01	2010	2	winter	815	Dead	1	Calypte anna	Calypte	anna	west	westside	west	westside	MEF	Appeared as if they hit the window during a territory chase, both were on the ground within 2 feet of each other, ants crawling on both specimens	not cataloged	CCO483	M	A		location updated on 8/7/2014			815		1	0	0	0	0	0	0	0		1
2010-02-01	2010	2	winter	815	Dead	1	Calypte anna	Calypte	anna	M	A	west	westside	MEF	Appeared as if they hit the window during a territory chase, both were on the ground within 2 feet of each other, ants crawling on both specimens	not cataloged	CCO486	M	A					815		1	0	0	0	0	0	0	0		1
2010-04-30	2010	4	spring	815	Dead	1	Selasphorus sasin	Selasphorus	sasin	M	AHY	west	westside	MEF	measurements taken to determine species, excellent condition for study skin	not cataloged	ASG200	M	A					815		1	0	0	0	0	0	0	0		1
2011-06-23	2011	6	summer	827	Dead	1	Zenaida macroura	Zenaida	macroura	U	AHY	north	Music Concourse	Security (Kyle)		not cataloged	LCW164	M	U					827		1	0	0	0	0	0	0	0		1
2013-10-13	2013	10	fall	830	Dead	1	Calypte anna	Calypte	anna	M		north	Concourse	Ernest		not cataloged	CCO653	M	A	sex/age at prep entered 8/5/14				830		1	0	0	0	0	0	0	0		1
2009-08-05	2009	8	summer	830	Dead	1	Calypte anna	Calypte	anna	M	HY	east	east garden	MEF		96913	PLG771	M	HY		Aged 8/12/2014			830		1	0	0	0	0	0	0	0		1
2010-05-26	2010	5	spring	830	Dead	1	Selasphorus sasin	Selasphorus	sasin	M	HY	west	westside	MEF		not cataloged	MK1117	M	HY					830		1	0	0	0	0	0	0	0		1
2010-11-01	2010	11	fall	830	Dead	1	Geothlypis trichas	Geothlypis	trichas			???	N/A	Patrick Bird	Guest Services	not cataloged	ASG243	M	HY		recorded at prep as HY male by plumage, Originally identified as Wilson’s Warbler, identification changed by ASG when prepping.			830		1	0	0	0	0	0	0	0		1
2013-07-01	2013	7	summer	830	Dead	1	Sayornis nigricans	Sayornis	nigricans	U	HY	north	Front Entrance	Tina Liang (Custodial)	found dead and given to custodial	not cataloged	LCW739	F	HY	sex/age at prep entered 8/5/14				830		1	0	0	0	0	0	0	0		1
2008-05-12	2008	5	spring	830	Dead	1	Calypte anna	Calypte	anna	F	HY?	west	westside			96678	CCO146	U	U	pickle				830		1	0	0	0	0	0	0	0		1
2008-05-12	2008	5	spring	830	Dead	1	Calypte anna	Calypte	anna			east	eastside			96617	LCW265	M	A					830		1	0	0	0	0	0	0	0		1
2008-05-12	2008	5	spring	830	Dead	1	Calypte anna	Calypte	anna	F	U	east	eastside			97093	PLG749	F	A		Aged 8/12/2014			830		1	0	0	0	0	0	0	0		1
2008-05-12	2008	5	spring	830	Dead	1	Calypte anna	Calypte	anna			north	northside			not cataloged	PLG873	M	A					830		1	0	0	0	0	0	0	0		1
2012-10-17	2012	10	fall	835	Dead	1	Melospiza lincolnii	Melospiza	lincolnii	U	U	north	Front concourse	Carl Lieber (Guest Services)		not cataloged	LCW539	M	HY		Bill 50% ossified.			835		1	0	0	0	0	0	0	0		1
2012-11-14	2012	11	fall	835	Dead	1	Calypte anna	Calypte	anna	M	AD	north	Front concourse	Carl Lieber (Guest Services)		not cataloged	LCW554	M	A					835		1	0	0	0	0	0	0	0		1
2013-10-07	2013	10	fall	835	Dead	1	Melospiza lincolnii	Melospiza	lincolnii	U	U	north	Front doors	Clint (Custodial)		not cataloged	CCO652	U	HY	sex/age at prep entered 8/5/14	No info in prep book as to why HY bird, skull written as ossified so could be HY or could be A based on collection date.			835		1	0	0	0	0	0	0	0		1
2012-02-05	2012	2	winter	835	Dead	1	Passerella iliaca	Passerella	iliaca	U	U	west	West Garden	Jessica Gills	Guest services	not cataloged	CCO174	M	A		Testes measured during prep			835		1	0	0	0	0	0	0	0		1
2012-04-25	2012	4	spring	840	Dead	1	Cardellina pusilla	Cardellina	pusilla	M	Adult	north	Concourse	Tanea Tolbert	Guest services, was left in project lab freezer	not cataloged	LCW403	F	A					840		1	0	0	0	0	0	0	0		1
2013-09-29	2013	9	fall	845	Dead	1	Empidonax difficilis	Empidonax	difficilis			B2	B2W windows	LCW	shades all open on south side of building	not cataloged	LCW851	M	HY	sex/age at prep entered 8/5/14				845		1	0	0	0	0	0	0	0		1
2010-07-22	2010	7	summer	845	Dead	1	Junco hyemalis	Junco	hyemalis	U	HY	west	westside	MEF		not cataloged	MHM049	M	HY		aged by plumage 8/8/2014			845		1	0	0	0	0	0	0	0		1
2010-10-21	2010	10	fall	845	Dead	1	Setophaga coronata	Setophaga	coronata	U	U	west	West Garden	MEF	Audubon's Warbler	not cataloged	ASG239	M	U					845		1	0	0	0	0	0	0	0		1
2009-07-08	2009	7	summer	845	Dead	1	Junco hyemalis	Junco	hyemalis	U	JUV	west	westside	PLG	skin 7/29/09 MK	not cataloged	MK1088	F	HY					845		1	0	0	0	0	0	0	0		1
2011-03-16	2011	3	spring	846	Dead	1	Calypte anna	Calypte	anna	F	Adult?	Staff entrance	Southside, reception entrance	Anne Reid		97172	ASG294	F	A					846		1	0	0	0	0	0	0	0		1
2013-08-23	2013	8	summer	900	Dead	1	Turdus migratorius	Turdus	migratorius	F		B2	B2 west window	CCO		not cataloged	LCW834	F	HY	skeletal prep? Ask LCW				900		0	1	0	0	0	0	0	0		1
2013-05-18	2013	5	spring	900	Dead	1	Selasphorus sasin	Selasphorus	sasin			east	East garden	CCO	shades closed at time of survey, bird found on table	not cataloged	CCO536	F	A	aged using Pyle 8/8/2014 LQK				900		0	1	0	0	0	0	0	0		1
2013-08-09	2013	8	summer	900	Dead	1	Junco hyemalis	Junco	hyemalis	U	HY	north	Front entrance	Clint (Custodial)		not cataloged	LCW833	M	HY	sex/age at prep entered 8/5/14				900		0	1	0	0	0	0	0	0		1
2009-10-22	2009	10	fall	900	Dead	1	Melospiza melodia	Melospiza	melodia	U	HY	east	east garden	MEF		not cataloged	CEC018	M	U					900		0	1	0	0	0	0	0	0		1
2009-07-25	2009	7	summer	900	Dead	1	Calypte anna	Calypte	anna	F	HY	east	east garden	PLG		96997	PLG760	M	HY		Aged 8/12/2014			900		0	1	0	0	0	0	0	0		1
2012-04-29	2012	4	spring	910	Dead	1	Calypte anna	Calypte	anna	south	Employee entrance	Staff entrance	Employee entrance	CCO	found together	not cataloged	CCO382	M	A		aged by plumage 8/8/2014			910		0	1	0	0	0	0	0	0		1
2012-04-29	2012	4	spring	910	Dead	1	Calypte anna	Calypte	anna	M	AD/AHY	Staff entrance	Employee entrance	CCO	found together	not cataloged	CCO407	M	HY		aged by plumage 8/8/2014			910		0	1	0	0	0	0	0	0		1
2010-11-02	2010	11	fall	910	Dead	1	Zonotrichia atricapilla	Zonotrichia	atricapilla	U	HY	west	West Garden	E. Bolich		not cataloged	PJY041	M	HY					910		0	1	0	0	0	0	0	0		1
2008-09-04	2008	9	fall	915	Dead	1	Junco hyemalis	Junco	hyemalis	unknown	HY	east	eastside			not cataloged	MK1069	M	HY		Added according to MK's prep notes, age data entered 8/7/2014			915		0	1	0	0	0	0	0	0		1
2011-03-23	2011	3	spring	930	Dead	1	Calypte anna	Calypte	anna	M	HY	north	Northside, entrance between door 4 and exit door	Angela Hile		not cataloged	CCO224	M	A		Originally identified in spreadsheet as HY M based on plumage. Unsure why changed to Adult U, as it's a hummingbird.			930		0	1	0	0	0	0	0	0		1
2013-05-24	2013	5	spring	930	Dead	1	Calypte anna	Calypte	anna			Staff entrance	employee entrance	Debi Espinoza-Bylin (Public programs)		not cataloged	CCO537	M	HY	sex/age at prep entered 8/5/14, aged using Pyle 8/8/2014 LQK				930		0	1	0	0	0	0	0	0		1
2010-10-26	2010	10	fall	930	Dead	1	Junco hyemalis	Junco	hyemalis	U	U	north	staff entrance	Emily Magnaghi		97158	ASG240	F	A		sexed by plumage 8/8/2014			930		0	1	0	0	0	0	0	0		1
2010-06-10	2010	6	summer	930	Dead	1	Selasphorus sasin	Selasphorus	sasin	U	HY	west	westside	Luis Campos		not cataloged	CCO299	U	U					930		0	1	0	0	0	0	0	0		1
2011-04-25	2011	4	spring	930	Dead	1	Junco hyemalis	Junco	hyemalis	M	AHY	north	Northside, main lobby	MEF	entered building then hit window trying to get out.	not cataloged	LCW139	M	A					930		0	1	0	0	0	0	0	0		1
2013-02-27	2013	2	winter	933	Dead	1	Catharus guttatus	Catharus	guttatus			B2	B2 East window, by CUP entrance	Omar McCutcheon (CAS engineering)	stuck to concrete, partially degraded	not cataloged	AMS021	U	A	90% oss - skeletal prep				933		0	1	0	0	0	0	0	0		1
2012-09-17	2012	9	fall	950	Dead	1	Euphagus cyanocephalus	Agelaius	phoenicus	M	IMM	north	Front concourse	Carl Lieb, Guest services		not cataloged	LCW582	F	HY		Agelaius phoenicus, not Euphagus cyanocephalus.			950		0	1	0	0	0	0	0	0		1
2009-03-26	2009	3	spring	950	Dead	1	Junco hyemalis	Junco	hyemalis	F	AD	north	northside	Education dept.			IGK019	F	A		prep umber entered 8/7/2014; check for specimen to age/sex			950		0	1	0	0	0	0	0	0		1
2013-11-06	2013	11	fall	950	Dead	1	Calypte anna	Calypte	anna	M		north	Front concourse	Walter Pizarro (Guest Services)		not cataloged	CCO681	M	A	sex/age at prep entered 8/5/14, aged using Pyle 8/8/2014 LQK				950		0	1	0	0	0	0	0	0		1
2012-09-02	2012	9	fall	955	Dead	1	Setophaga petechia	Setophaga	petechia	F		north	Front concourse	Tanea Tolbert		not cataloged	LCW502	U	HY					955		0	1	0	0	0	0	0	0		1
2010-07-21	2010	7	summer	957	Dead	1	Euphagus cyanocephalus	Euphagus	cyanocephalus	U	HY	west	westside	security		not cataloged	MHM048	M	U					957		0	1	0	0	0	0	0	0		1
2010-11-16	2010	11	fall	1000	Dead	1	Calypte anna	Calypte	anna	M	HY	north	Exit door (main entrance)	B. Espinoza	Security	not cataloged	ASG259	M	HY					1000		0	1	0	0	0	0	0	0		1
2010-06-29	2010	6	summer	1000	Dead	1	Junco hyemalis	Junco	hyemalis	U	HY	Staff entrance	South entrance	Custodial services	May have been there for a day or two	not cataloged	PJY029	M	HY		age confirmed by plumage 8/8/2014			1000		0	1	0	0	0	0	0	0		1
2009-05-27	2009	5	spring	1000	Dead	1	Melospiza melodia	Melospiza	melodia	U	HY	east	east garden	custodians	skin 5/29/09 JMR	not cataloged	JMR992	M	HY	10% oss				1000		0	1	0	0	0	0	0	0		1
2010-09-14	2010	9	fall	1000	Dead	1	Calypte anna	Calypte	anna	U	HY	west	West Garden	Exhibits	Stunned, given to Dr. Frieland Dunker - died that afternoon	not cataloged	LCW432	U	U					1000		0	1	0	0	0	0	0	0		1
2012-07-21	2012	7	summer	1000	Dead	1	Euphagus cyanocephalus	Euphagus	cyanocephalus	M	AD	west	West Garden	Miao Liu (CAS custodian)	CAS guests saw 2 birds hit window, gave to Miao Liu who gave to Brian Simison. One bird (juvenile M)still alive, released.	not cataloged	AMS017	M	A	50% oss	Prep book says skull 50% ossified (should be questioned), but plumage is A M, not HY.			1000		0	1	0	0	0	0	0	0		1
2009-05-25	2009	5	spring	1000	Dead	1	Calypte anna	Calypte	anna	U	HY	north	frontside (northside)	Nance Perkins		not cataloged	JMR1015	F	U					1000		0	1	0	0	0	0	0	0		1
2013-12-24	2013	12	winter	1001	Dead	1	Calypte anna	Calypte	anna	M	AHY?	north	music concourse	Clint (Custodial)		not cataloged	LCW888	M	A	sex/age at prep entered 8/5/14				1001		0	1	0	0	0	0	0	0		1
2011-06-05	2011	6	summer	1015	Dead	1	Calypte anna	Calypte	anna	U	HY	Staff entrance	Southside, reception entrance	Eric Bolich (Security)		not cataloged	CCO275	M	HY		sexed by CCO at prep, aged by plumage 8/8/2014			1015		0	1	0	0	0	0	0	0		1
2012-08-08	2013	4	spring	1020	dead	1	Selasphorus sasin	Selasphorus	sasin	north	front doors	north	front entrance	Ernest Parker		not cataloged	CCO494	M	HY		added by EJC using CCO prep notebook			1020		0	1	0	0	0	0	0	0		1
2012-11-02	2012	11	fall	1020	Dead	1	Calypte anna	Calypte	anna	M	IMM	north	Front doors (#2)	Kathleen Bonner		not cataloged	CCO385	M	HY		aged by plumage 8/8/2014			1020		0	1	0	0	0	0	0	0		1
2011-08-15	2011	8	summer	1023	Dead	1	Calypte anna	Calypte	anna	M	HY	north	Front member door	Pat Bird	Guest Services	not cataloged	CCO279	M	HY		aged by plumage 8/8/2014			1023		0	1	0	0	0	0	0	0		1
2011-03-14	2011	3	spring	1024	Dead	1	Carpodacus mexicanus	Carpodacus	mexicanus?	M	U	west	westside	Security		not cataloged	MHM080	M	A					1024		0	1	0	0	0	0	0	0		1
2011-07-22	2011	7	summer	1030	Dead	1	Calypte anna	Calypte	anna	U	HY	Staff entrance	Southside, reception entrance	Alfredo T.	(Security)	not cataloged	LCW396	F	HY		HY determined at collection, F by tail pattern.			1030		0	1	0	0	0	0	0	0		1
2009-05-06	2009	5	spring	1030	Dead	1	Cardellina pusilla	Cardellina	pusilla	M	AHY	B2	southside	Brian Fisher		not cataloged	MK1082	M	A					1030		0	1	0	0	0	0	0	0		1
2011-05-26	2011	5	spring	1030	Dead	1	Selasphorus sasin	Selasphorus	sasin			east	East garden	C. Kang (Security)	identified by O. Carmi 22 June 2011	not cataloged	LCW394	F	HY		HY M by MEF when initially received. Measurements = F.			1030		0	1	0	0	0	0	0	0		1
2009-09-02	2009	9	fall	1030	Dead	1	Carduelis psaltria	Carduelis	psaltria		HY	B2	southeast windows (B2E)	Engineers		96912	PLG794	F	HY		added using online catalog & PLG prep notebook			1030		0	1	0	0	0	0	0	0		1
2009-06-03	2009	6	summer	1030	Dead	1	Selasphorus sasin	Selasphorus	sasin	F?	HY?	east	east garden	Estival		96992	PLG755	M	Hy		Aged 8/12/2014			1030		0	1	0	0	0	0	0	0		1
2013-09-17	2013	9	fall	1030	Dead	1	Setophaga townsendi	Setophaga	townsendi			B2	B2W windows	LCW	Reported by Roberta Brett. Partially rotting, stuck on ground - must not have spotted it during morning walk	not cataloged	LCW845	F	A	skeletal prep				1030		0	1	0	0	0	0	0	0		1
2009-11-19	2009	11	fall	1030	Dead	1	Calypte anna	Calypte	anna	F	HY	north	northside	MEF		not cataloged	PLG844	F	U					1030		0	1	0	0	0	0	0	0		1
2011-06-12	2011	6	summer	1030	Dead	1	Euphagus cyanocephalus	Euphagus	cyanocephalus	F	AHY	west	West garden	Tina Liang	found between the tent and the building	not cataloged	PJY056	M	HY		age determined by plumage			1030		0	1	0	0	0	0	0	0		1
2011-01-10	2011	1	winter	1033	Dead	1	Calypte anna	Calypte	anna	F	AHY	west	West garden	Elise Richard	brought to Customer service by a visitor	not cataloged	CCO059	F	A					1033		0	1	0	0	0	0	0	0		1
2011-06-29	2011	6	summer	1035	Dead	1	Selasphorus sasin	Selasphorus	sasin	F?	HY	Staff entrance	Southside, reception entrance	Beth Goldstein		not cataloged	CCO220	F	HY		age updated 8/7/2014 based on accession file card (MEF aged at time of collection)			1035		0	1	0	0	0	0	0	0		1
2009-12-19	2009	12	winter	1045	Dead	1	Calypte anna	Calypte	anna	M	AHY	north	northside	PLG		not cataloged	PLG869	M	A		aged by plumage 8/8/2014			1045		0	1	0	0	0	0	0	0		1
2011-11-14	2011	11	fall	1053	Dead	1	Passerella iliaca	Passerella	iliaca	U	U	west	West Garden	Kyle	Security	not cataloged	CCO128	M	U					1053		0	1	0	0	0	0	0	0		1
2010-04-12	2010	4	spring	1053	Dead	1	Calypte anna	Calypte	anna	M	Adult	east	east garden	Security - Natalie	1053 MEF phoned Ari Harding inquiring why east shades are up today	not cataloged	ASG199	M	A					1053		0	1	0	0	0	0	0	0		1
2013-03-31	2013	3	spring	1054	Dead	1	Certhia americana	Certhia	americana			north	Front doors	Steven Harris		not cataloged	CCO482	M	A					1054		0	1	0	0	0	0	0	0		1
2011-11-06	2011	11	fall	1055	Dead	1	Zenaida macroura	Zenaida	macroura	U	U	Staff entrance	staff entrance	Anne Reid	Top of window	not cataloged	NAM075	M	U					1055		0	1	0	0	0	0	0	0		1
2011-10-12	2011	10	fall	1055	Dead	1	Calypte anna	Calypte	anna	M	HY	north	Front entrance	Tane'a Tolbert	Guest Services	not cataloged	CCO215	M	HY		age updated 8/7/2014 based on accession file card (MEF aged at time of collection)			1055		0	1	0	0	0	0	0	0		1
2010-10-31	2010	10	fall	1057	Dead	1	Calypte anna	Calypte	anna	M	HY	west	West Garden	N. Estival		not cataloged	CEC033	M	HY		age entered based on accession file 8/7/2014			1057		0	1	0	0	0	0	0	0		1
2012-09-05	2012	9	fall	1100	Dead	1	Columba livia	Columba	livia			Staff entrance	business reception	Anne Reid	bill looks weird - upper mandible seems to be smaller than lower (unless it just froze in a strange position)	not cataloged	CCO366	U	U					1100		0	0	1	0	0	0	0	0		1
2010-06-26	2010	6	summer	1100	Dead	1	Calypte anna	Calypte	anna	U	HY	Staff entrance	South entrance	Beth Goldstein		not cataloged	PJY045	M	HY		aged by plumage 8/8/2014			1100		0	0	1	0	0	0	0	0		1
2011-05-16	2011	5	spring	1100	Dead	1	Junco hyemalis	Junco	hyemalis	U	HY	B2	southside, B2W	Christina Cordova		97173	ASG301	U	HY					1100		0	0	1	0	0	0	0	0		1
2013-10-04	2013	10	fall	1100	Dead	1	Vermivora celata	Vermivora	celata	U	U	B2	B2W windows	Christina Cordova		not cataloged	LCW868	F	HY	sex/age at prep entered 8/5/14				1100		0	0	1	0	0	0	0	0		1
2010-10-05	2010	10	fall	1100	Dead	1	Junco hyemalis	Junco	hyemalis	U	U	west	west garden	custodial staff		not cataloged	LCW239	U	U					1100		0	0	1	0	0	0	0	0		1
2012-10-18	2012	10	fall	1100	Dead	1	Calypte anna	Calypte	anna	M	AHY?	west	West Garden	Freeland Dunker and Aquarium Staff		not cataloged	CCO369	M	A					1100		0	0	1	0	0	0	0	0		1
2010-10-13	2010	10	fall	1100	Dead	1	Junco hyemalis	Junco	hyemalis	U	U	west	West Garden	Reyes/Barillas	(Security)	not cataloged	PJY042	M	U		date corrected on 8/7/2014, changed from 10/12/2010 to 10/13/2010 based on accession file			1100		0	0	1	0	0	0	0	0		1
2011-09-07	2011	9	fall	1110	Dead	1	Setophaga petechia	Setophaga	petechia	U	HY	B2	B2 South, outside Norm Penny's Desk	ASG		not cataloged	MK1138	F	U					1110		0	0	1	0	0	0	0	0		1
2013-09-04	2013	9	fall	1110	Dead	1	Calypte anna	Calypte	anna	M?	HY?	north	Front doors	Pat Bird		not cataloged	CCO632	M	HY	sex/age at prep entered 8/5/14, aged using Pyle 8/8/2014 LQK				1110		0	0	1	0	0	0	0	0		1
2010-10-26	2010	10	fall	1115	Dead	1	Calypte anna	Calypte	anna	M?	HY?	north	staff entrance	Barb Barbee	ASG346 pickled 7/7/2011	96741	ASG346	F	A					1115		0	0	1	0	0	0	0	0		1
2010-05-11	2010	5	spring	1115	Dead	1	Selasphorus sasin	Selasphorus	sasin	F?	U	west	westside	C. Kang	brought down by security; PJY037 pickled 10/28/2010	96757	PJY037	F	HY					1115		0	0	1	0	0	0	0	0		1
2009-05-06	2009	5	spring	1115	Dead	1	Calypte anna	Calypte	anna	M	HY	west	westside	Cafe staff		96994	PLG757	M	HY		Aged 8/12/2014			1115		0	0	1	0	0	0	0	0		1
2008-07-02	2008	7	summer	1115	Dead	1	Selasphorus sasin	Selasphorus	sasin	male	HY	east	eastside			96615	LCW263	F	HY	pickle; corr 70%; medium-width outer rec with white tip; r1 rufous with green tip				1115		0	0	1	0	0	0	0	0		1
2013-07-08	2013	7	summer	1117	Dead	1	Sayornis nigricans	Sayornis	nigricans	U	HY	north	Front concourse	Guest services		not cataloged	LCW765	M	HY	sex/age at prep entered 8/5/14				1117		0	0	1	0	0	0	0	0		1
2013-10-02	2013	10	fall	1123	Dead	1	Calypte anna	Calypte	anna	M	HY	north	front doors	Mako Shoemaker		not cataloged	CCO663	M	A	sex/age at prep entered 8/5/14				1123		0	0	1	0	0	0	0	0		1
2010-11-09	2010	11	fall	1128	Dead	1	Calypte anna	Calypte	anna	U	U	west	West Garden	Natalie	Security	not cataloged	ASG264	F	A		mounted for Spring 2011 Exhibit			1128		0	0	1	0	0	0	0	0		1
2009-09-11	2009	9	fall	1130	Dead	1	Calypte anna	Calypte	anna	M	HY	north	northside	Belinda Espinoza	skin 09/12/09 PLG 801	96920	PLG801	M	HY					1130		0	0	1	0	0	0	0	0		1
2009-06-22	2009	6	summer	1130	Dead	1	Calypte anna	Calypte	anna	M	HY?	north	frontside (northside)	custodian		97002	PLG769	M	HY		Aged 8/12/2014			1130		0	0	1	0	0	0	0	0		1
2009-07-17	2009	7	summer	1130	Dead	1	Calypte anna	Calypte	anna	F	AHY	north	northside	guest services Angela	skin 7/19/09 PLG 753	97101	PLG753	M	HY		Aged 8/12/2014			1130		0	0	1	0	0	0	0	0		1
2011-09-27	2011	9	fall	1130	Dead	1	Calypte anna	Calypte	anna	U	HY	north	front entrance	Guest Services (Ernest)		not cataloged	LCW353	M	HY					1130		0	0	1	0	0	0	0	0		1
2011-04-27	2011	4	spring	1130	Dead	1	Euphagus cyanocephalus	Euphagus	cyanocephalus	F	AHY	east	East garden	Security		not cataloged	ACH001	F	A					1130		0	0	1	0	0	0	0	0		1
2010-10-26	2010	10	fall	1130	Dead	1	Catharus guttatus	Catharus	guttatus	U	U	west	West Garden	Victor Kitkeatlers	Security	not cataloged	CCO488	U	U					1130		0	0	1	0	0	0	0	0		1
2013-07-16	2013	7	summer	1155	Dead	1	Calypte anna	Calypte	anna	U	U	Staff entrance	Service desk	Carl		not cataloged	CCO644	F	HY	need to check skin for age/sex 8/5/14, aged using Pyle 8/8/2014 LQK				1155		0	0	1	0	0	0	0	0		1
2013-10-05	2013	10	fall	1155	Dead	1	Calypte anna	Calypte	anna	M	U	north	front doors	Joe Lerma		not cataloged	LCW867	M	HY	check age with Pyle				1155		0	0	1	0	0	0	0	0		1
2011-06-19	2011	6	summer	1155	Dead	1	Selasphorus sasin	Selasphorus	sasin			north	Front member door	Patrick Bird	identified by O. Carmi 22 June 2011	not cataloged	LCW393	F	A		HY M by MEF when initially received. No corrugation seen on bill during prep, wing measurement = F.			1155		0	0	1	0	0	0	0	0		1
2010-10-18	2010	10	fall	1200	Dead	1	Zonotrichia leucophrys	Zonotrichia	leucophrys	U	HY	B2	South B2 Window	Christina Cordova		not cataloged	MHM052	F	U					1200		0	0	1	0	0	0	0	0		1
2012-08-22	2012	8	summer	1200	Dead	1	Setophaga petechia	Setophaga	petechia	F	AHY?	Staff entrance	staff entrance	Gerber Ramirez		not cataloged	LCW494	U	HY					1200		0	0	1	0	0	0	0	0		1
2011-09-08	2011	9	fall	1200	Dead	1	Setophaga petechia	Setophaga	petechia	U	HY	north	Front entrance	Guest Services	Skull 20% ossified	not cataloged	ASG406	M	HY					1200		0	0	1	0	0	0	0	0		1
2009-04-28	2009	4	spring	1200	Dead	1	Calypte anna	Calypte	anna	F	U	west	west garden	Sean Reddix & Karis Zaldivar		96999	PLG763	F	HY		Aged 8/12/2014			1200		0	0	1	0	0	0	0	0		1
2009-04-29	2009	4	spring	1200	Dead	1	Calypte anna	Calypte	anna	M / U	A / HY	west	west garden	Sean Reddix & Karis Zaldivar		97001	PLG768	M	A		Aged 8/12/2014			1200		0	0	1	0	0	0	0	0		1
2011-10-11	2011	10	fall	1210	Dead	1	Calypte anna	Calypte	anna	M	AHY	north	front entrance	Rachel Smith	guest services	not cataloged	CCO183	M	A		aged by plumage 8/8/2014			1210		0	0	1	0	0	0	0	0		1
2012-07-21	2012	7	summer	1215	Dead	1	Calypte anna	Calypte	anna			north	front entrance	Todd Quackerbush (sp?)	hit glass window general admission door	not cataloged	CCO489	M	HY					1215		0	0	1	0	0	0	0	0		1
2011-06-26	2011	6	summer	1220	Dead	1	Sitta pygmaea	Sitta	pygmaea	U	U	north	Front entrance	Nelson		not cataloged	LCW558	M	U					1220		0	0	1	0	0	0	0	0		1
2012-10-01	2012	10	fall	1225	Dead	1	Calypte anna	Calypte	anna	M	AHY?	north	Front concourse	Tanea Tolbert, Guest Services		not cataloged	CCO491	M	A					1225		0	0	1	0	0	0	0	0		1
2012-07-18	2012	7	summer	1230	Dead	1	Melospiza melodia	Melospiza	melodia	U	HY	Staff entrance	staff entrance	Andrea Herrera, Christina Cordova		not cataloged	CEC058	U	HY					1230		0	0	1	0	0	0	0	0		1
2010-06-15	2010	6	summer	1230	Dead	1	Selasphorus sasin	Selasphorus	sasin	U	HY	west	westside	Luis Campos		not cataloged	ASG244	M	HY					1230		0	0	1	0	0	0	0	0		1
2013-07-30	2013	7	summer	1230	Dead	1	Selasphorus sasin	Selasphorus	sasin	M	HY	Staff entrance	Staff Entrance	MEF	reported to MEF by AQ (Eric Hupperts)	not cataloged	LCW830	M	HY	sex/age at prep entered 8/5/14				1230		0	0	1	0	0	0	0	0		1
2012-06-28	2012	6	summer	1237	Dead	1	Selasphorus sasin	Selasphorus	sasin	M	HY	north	Exit door, front entrance	Ernest Parkes		not cataloged	CCO265	M	HY		By plumage			1237		0	0	1	0	0	0	0	0		1
2010-09-14	2010	9	fall	1245	Dead	1	Calypte anna	Calypte	anna	M	HY	east	East Garden	Kyle (security)				M	HY					1245		0	0	1	0	0	0	0	0		1
2011-08-30	2011	8	summer	1245	Dead	1	Junco hyemalis	Junco	hyemalis	U	HY	B2	B2 EAST, outside IZG	Sara Stebick		not cataloged	MK1141	M	U					1245		0	0	1	0	0	0	0	0		1
2013-06-19	2013	6	summer	1249	Dead	1	Junco hyemalis	Junco	hyemalis	U	HY	B2	B2 West window	LCW & CCO	spotted walking back from lunch	not cataloged	LCW729	M	HY	sex/age at prep entered 8/5/14				1249		0	0	1	0	0	0	0	0		1
2010-09-09	2010	9	fall	1300	Dead	1	Setophaga petechia	Setophaga	petechia	M?	HY?	north	front entrance	A. Figueroa	(Security)	not cataloged	MK1124	M	HY	25% oss	date corrected 8/7/2014 changed from 9/19/2014 to 9/9/2014 based on accession file			1300		0	0	0	1	0	0	0	0		1
2013-05-23	2013	5	spring	1300	Dead	1	Junco hyemalis	Junco	hyemalis	U	HY	B2	Outside Arachnology Lab	Anthea Carmichael		not cataloged	LCW708	M	HY	sex/age at prep entered 8/5/14				1300		0	0	0	1	0	0	0	0		1
2013-07-31	2013	7	summer	1300	Dead	1	Calypte anna	Calypte	anna	M?	HY?	west	West Garden	Avi		not cataloged	LCW832	F	HY	sex/age at prep entered 8/5/14				1300		0	0	0	1	0	0	0	0		1
2010-09-24	2010	9	fall	1300	Dead	1	Calypte anna	Calypte	anna	M	U	east	East garden	Beatriz Zaldivar	(Security)	97144	ASG257	M	A					1300		0	0	0	1	0	0	0	0		1
2010-10-25	2010	10	fall	1300	Dead	1	Junco hyemalis	Junco	hyemalis	U	U	B2	South B2 Window	Engineering	Specimen discarded - advanced decomposition, maggot infested			U	U					1300		0	0	0	1	0	0	0	0		1
2009-06-11	2009	6	summer	1300	Dead	1	Calypte anna	Calypte	anna	F?	HY	east	east garden	Eric Bollich		96993	PLG756	F	HY		Aged 8/12/2014			1300		0	0	0	1	0	0	0	0		1
2011-12-21	2011	12	winter	1300	Dead	1	Setophaga coronata	Setophaga	coronata	U	U	B2	south side, B2	Jere Schweikert and Ore Carmi		not cataloged	LCW339	F	U					1300		0	0	0	1	0	0	0	0		1
2009-08-16	2009	8	summer	1300	Dead	1	Calypte anna	Calypte	anna	F	HY	east	east garden	security		97133	ASG124	F	HY					1300		0	0	0	1	0	0	0	0		1
2012-09-07	2012	9	fall	100	Dead	1	Euphagus cyanocephalus	Euphagus	cyanocephalus	M		north	Front lobby	Xavier Zamudio		not cataloged	NAM080	M	HY	25% oss				1300		0	0	0	1	0	0	0	0		1
2012-07-05	2012	7	summer	110	Dead	1	Calypte anna	Calypte	anna	M	IMM	Staff entrance	staff entrance	CCO	Hit window, DOA	not cataloged	CCO269	M	HY					1310		0	0	0	1	0	0	0	0		1
2012-10-21	2012	10	fall	1310	Dead	1	Calypte anna	Calypte	anna			Staff entrance	Staff entrance	LCW	Was on top of trash can outside of staff entrance doors. Likely hit staff entrance windows.	not cataloged	CCO384	M	HY		aged by plumage 8/8/2014			1310		0	0	0	1	0	0	0	0		1
2013-10-27	2013	10	fall	1311	Dead	1	Calypte anna	Calypte	anna	U	U	north	Front doors	Mako Shoemaker (Guest Services)		not cataloged	LCW872	F	A	aged using Pyle 8/8/2014 LQK				1311		0	0	0	1	0	0	0	0		1
2012-07-05	2012	7	summer	115	Dead	1	Calypte anna	Calypte	anna	U	HY	north	Front entrance	Elise Ricard		not cataloged	CCO493	F	HY					1315		0	0	0	1	0	0	0	0		1
2010-07-02	2010	7	summer	1315	Dead	1	Poecile rufescens	Poecile	rufescens	U	HY	west	westside	Eric Bolich	Security - not sure if west screens were down or not at 1315; PJY040 pickled 10/28/2010	96760	PJY040	M	HY					1315		0	0	0	1	0	0	0	0		1
2009-07-04	2009	7	summer	1320	Dead	1	Euphagus cyanocephalus	Euphagus	cyanocephalus	F	HY	B2	southside office windows	PLG		not cataloged	PJY019	M	HY					1320		0	0	0	1	0	0	0	0		1
2009-10-22	2009	10	fall	1323	Dead	1	Calypte anna	Calypte	anna	M	HY	west	west garden	Eric Bolich		not cataloged	ASG148	M	HY					1323		0	0	0	1	0	0	0	0		1
2010-07-22	2010	7	summer	1330	Dead	1	Selasphorus sasin	Selasphorus	sasin	U	HY	north	staff entrance	Charles Griswold		not cataloged	CCO484	F	HY					1330		0	0	0	1	0	0	0	0		1
2010-06-11	2010	6	summer	1330	Dead	1	Selasphorus sasin	Selasphorus	sasin	U	HY	west	westside	Ian M. Bell	MEF checked shades at 3pm which were down at the time	not cataloged	CCO485	F	HY					1330		0	0	0	1	0	0	0	0		1
2012-10-30	2012	10	fall	1330	Dead	1	Calypte anna	Calypte	anna	M	HY?	Staff entrance	business reception	Kadee Barrett		not cataloged	CCO393	M	HY		aged by plumage 8/8/2014			1330		0	0	0	1	0	0	0	0		1
2012-06-09	2012	6	summer	130	Dead	1	Selasphorus sasin	Selasphorus	sasin			north	Member door, front entrance	Ricardo Gusdo	Beginnig 6/7 - In order to provide more natural light for the baby ostriches it was decided that the north and central sections of the west screens would be raised daily from 9am to 7pm through the deinstallation of the ostrich exhibit;It appeared that the screens had not been properly programmed for the ostrich chicks and remained down for the most part, each day. Thus shade deployment is unreli…	not cataloged	LCW430	F	HY		HY by bill corrugation, F by measurements.			1330		0	0	0	1	0	0	0	0		1
2012-01-14	2012	1	winter	1330	Dead	1	Calypte anna	Calypte	anna	U	U	Staff entrance	business reception			not cataloged	LCW422	F	A					1330		0	0	0	1	0	0	0	0		1
2013-11-21	2013	11	fall	1337	Dead	1	Calypte anna	Calypte	anna	F?	U	?	??	Guest services		not cataloged	CCO678	F	HY	sex/age at prep entered 8/5/14, aged using Pyle 8/8/2014 LQK				1337		0	0	0	1	0	0	0	0		1
2013-07-29	2013	7	summer	1340	Dead	1	Selasphorus sp.	Selasphorus	sp.			north	Front doors	Bryce Harris		not cataloged	LCW824	F	HY	sex/age at prep entered 8/5/14				1340		0	0	0	1	0	0	0	0		1
2009-04-19	2009	4	spring	1340	Dead	1	Calypte anna	Calypte	anna	F	AD	east	east terrace	Joseph - security		not cataloged	JMR1014	M	U		found on Moe's desk at 1340. Exact time unknown.			1340		0	0	0	1	0	0	0	0		1
2009-11-19	2009	11	fall	1350	Dead	1	Calypte anna	Calypte	anna	M	Adult	north	northside	Guest Services		not cataloged	ASG161	M	A		Sharp Shooter saw bird hit window and fall at main entrance			1350		0	0	0	1	0	0	0	0		1
2011-08-06	2011	8	summer	1400	Dead	1	Molothrus ater	Molothrus	ater	U	HY	Staff entrance	Southside, reception entrance	Beth Goldstein	Tag reads - "inside"	not cataloged	CCO088	M	HY					1400		0	0	0	1	0	0	0	0		1
2009-07-06	2009	7	summer	1400	Dead	1	Euphagus cyanocephalus	Euphagus	cyanocephalus	U	JUV	west	west garden	Eric Bollich		not cataloged	LAS008	F	HY					1400		0	0	0	1	0	0	0	0		1
2009-04-01	2009	4	spring	1400	Dead	1	Calypte anna	Calypte	anna	M	AD	east	eastside	Joanna Yu		96995	PLG758	M	A		Aged 8/12/2014			1400		0	0	0	1	0	0	0	0		1
2009-04-01	2009	4	spring	1400	Dead	1	Calypte anna	Calypte	anna	M	AD	east	eastside	Joanna Yu		96996	PLG759	M	A		Aged 8/12/2014			1400		0	0	0	1	0	0	0	0		1
2010-08-07	2010	8	summer	1400	Dead	1	Calypte anna	Calypte	anna	M	HY	north	staff entrance	N. Penny		not cataloged	RJH034	M	U		date in prep notebook was corrected to 1 Aug 2010, could this actually be 7 Aug 2010?			1400		0	0	0	1	0	0	0	0		1
2009-06-25	2009	6	summer	1400	Dead	1	Sturnus vulgaris	Sturnus	vulgaris	U	HY	west	west garden	Nance Perkins		97131	ASG116	F	HY					1400		0	0	0	1	0	0	0	0		1
2010-07-23	2010	7	summer	1400	Dead	1	Calypte costae	Calypte	costae	M	HY	north	staff entrance	Norm Penny	Checked ID with Pyle but still not 100% sure.	not cataloged	ASG226	M	HY					1400		0	0	0	1	0	0	0	0		1
2009-08-23	2009	8	summer	1400	Dead	1	Calypte anna	Calypte	anna	M	HY	east	east garden	PLG		not cataloged	PLG847	M	U					1400		0	0	0	1	0	0	0	0		1
2012-08-03	2012	8	summer	1400	dead	1	Selasphorus sasin	Selasphorus	sasin			north	front entrance	Ricardo		not cataloged	CCO495	M	HY		added by EJC using CCO prep notebook			1400		0	0	0	1	0	0	0	0		1
2012-01-21	2012	1	winter	1400	Dead	1	Calypte anna	Calypte	anna	U	U	east	east garden	unknown		not cataloged	LCW431	F	A					1400		0	0	0	1	0	0	0	0		1
2011-09-29	2011	9	fall	1420	Dead	1	Calypte anna	Calypte	anna	M	HY	west	west garden	Heather Aston		not cataloged	LCW375	M	HY					1420		0	0	0	1	0	0	0	0		1
2011-11-08	2011	11	fall	1430	Dead	1	Euphagus cyanocephalus	Euphagus	cyanocephalus	F	U	north	Front entrance	Jon Shaffer	Guest Services	not cataloged	NAM059	F	U					1430		0	0	0	1	0	0	0	0		1
2010-05-13	2010	5	spring	1430	Dead	1	Euphagus cyanocephalus	Euphagus	cyanocephalus	M	AHY	north	northside	Luis Campos	Security; CCO skinned 5/17/2010		CCO038	M	A		sexed/aged by plumage 8/8/2014			1430		0	0	0	1	0	0	0	0		1
2010-03-25	2010	3	spring	1500	Dead	1	Psaltriparus minimus	Psaltriparus	minimus	U	U	east	east garden	MEF	CCO skinned 3/29/10	not cataloged	CCO035	F	A					1500		0	0	0	0	1	0	0	0		1
2009-10-03	2009	10	fall	1500	Dead	1	Melospiza lincolnii	Melospiza	lincolnii	U	U	east	east garden	Natalie Salgado (Security)		97134	ASG132	M	HY		New Maya Lin Sculture in East garden with strange sounds - may help with window collisions			1500		0	0	0	0	1	0	0	0		1
2010-08-31	2010	8	summer	1511	Dead	1	Calypte anna	Calypte	anna	M?	HY	Staff entrance	staff entrance	Eric Bolich	PJY035 pickled 10/28/2010	96755	PJY035	M	HY		age updated 8/7/2014 based on accession file			1511		0	0	0	0	1	0	0	0		1
2011-12-20	2011	12	winter	1520	Dead	1	Euphagus cyanocephalus	Euphagus	cyanocephalus	F	AHY	west	west garden	Trong Tran	Security	not cataloged	NAM065	F	U					1520		0	0	0	0	1	0	0	0		1
2013-10-29	2013	10	fall	1530	Dead	1	Euphagus cyanocephalus	Euphagus	cyanocephalus	M	Ad	north	front doors	Albert Lee (Custodial)		not cataloged	CCO662	M	A	sex/age at prep entered 8/5/14				1530		0	0	0	0	1	0	0	0		1
2009-09-26	2009	9	fall	1530	Dead	1	Calypte anna	Calypte	anna	M	HY	Staff entrance	south entrance	Belinda Espinoza		not cataloged	PLG846	M	U		tent set up in east garden for anniversary weekend			1530		0	0	0	0	1	0	0	0		1
2012-10-17	2012	10	fall	1530	Dead	1	Calypte anna	Calypte	anna	M	AHY?	Staff entrance	business reception	Christina Cordova		not cataloged	LCW555	M	A					1530		0	0	0	0	1	0	0	0		1
2011-08-15	2011	8	summer	1530	Dead	1	Calypte anna	Calypte	anna	F	HY	north	Front Entrance (door 2)	Dominique Stoddard	Guest Services	not cataloged	CCO186	F	HY		Double-check the tail pattern, looks to be F instead of M.			1530		0	0	0	0	1	0	0	0		1
2013-07-06	2013	7	summer	1530	Dead	1	Selasphorus sasin	Selasphorus	sasin	F?	AHY?	north	Front concourse	Joe Lerma		not cataloged	LCW831	F	HY	species/age/sex identified during prep, updated 8/5/14				1530		0	0	0	0	1	0	0	0		1
2012-05-20	2012	5	spring	1535	Dead	1	Selasphorus sasin	Selasphorus	sasin			Staff entrance	Member door, front entrance	Angela Hile		97078	LCW421	M	HY	pickle; corr. 20%; very thin outer rec with white tip				1535		0	0	0	0	1	0	0	0		1
2012-11-15	2012	11	fall	1550	Dead	1	Euphagus cyanocephalus	Euphagus	cyanocephalus	F		west	West Garden	Beatriz Zaldiver (Security)		not cataloged	CCO380	F	U		Ovary measured during prep			1550		0	0	0	0	1	0	0	0		1
2009-08-10	2009	8	summer	1600	Dead	1	Calypte anna	Calypte	anna	M	HY	east	east garden	Alfredo Terrazas	skin 8/13/09 PLG 783	96917	PLG783	M	HY					1600		0	0	0	0	1	0	0	0		1
2009-06-11	2009	6	summer	1600	Dead	1	Calypte anna	Calypte	anna	F?	HY	east	east garden	guest services		96623	LCW274	F	HY	pickle; corr. 80%; white tip on r5 pointing toward the black subterminal band centrally; outer primary reatively blunt and straight				1600		0	0	0	0	1	0	0	0		1
2009-08-25	2009	8	summer	1600	Dead	1	Euphagus cyanocephalus	Euphagus	cyanocephalus	F	HY	west	west garden	Jose - Security		not cataloged	LAS009	F	HY					1600		0	0	0	0	1	0	0	0		1
2009-08-29	2009	8	summer	1600	Dead	1	Calypte anna	Calypte	anna	F	HY	east	east garden	K. Zaldivar	skin 9/17/09 PLG 791	96921	PLG803	M	HY					1600		0	0	0	0	1	0	0	0		1
2010-07-27	2010	7	summer	1600	Dead	1	Calypte anna	Calypte	anna	M	HY	east	east garden	R. Ronconi / M. Ramos		not cataloged	CCO298	U	U					1600		0	0	0	0	1	0	0	0		1
2012-11-26	2012	11	fall	1600	Dead	1	Euphagus cyanocephalus	Euphagus	cyanocephalus	M	?	west	West Garden	Rob Ronconi	Found behind a garbage can, already partly decomposed.	not cataloged	KJO049	U	U	100% oss				1600		0	0	0	0	1	0	0	0		1
2012-10-06	2012	10	fall	1600	Dead	1	Calypte anna	Calypte	anna			Staff entrance	Business reception	Rob Ronconi		not cataloged	CCO394	M	HY		aged by plumage 8/8/2014			1600		0	0	0	0	1	0	0	0		1
2009-06-04	2009	6	summer	1600	Dead	1	Selasphorus sasin	Selasphorus	sasin	M?	HY?	east	east side	Security		97003	PLG770	M	HY		Aged 8/12/2014			1600		0	0	0	0	1	0	0	0		1
2013-12-16	2013	12	winter	1615	Dead	1	Setophaga coronata	Setophaga	coronata	F?	U	B2	B2 East	Christina Piotrowski		not cataloged	CCO683	M	A	sex/age at prep entered 8/5/14				1615		0	0	0	0	1	0	0	0		1
2009-06-19	2009	6	summer	1620	Dead	1	Euphagus cyanocephalus	Euphagus	cyanocephalus			east	east garden	K. Esqutria		not cataloged	MEY011	F	U					1620		0	0	0	0	1	0	0	0		1
2010-06-20	2010	6	summer	1620	Dead	1	Selasphorus sasin	Selasphorus	sasin	U	HY	east	eastside	Rob Ronconi		97143	ASG220	F	HY		found in collection 8/8/2014 added prep by ASG; date wrong in ASG notebook, aged and sexed by plumage			1620		0	0	0	0	1	0	0	0		1
2012-01-06	2012	1	winter	1625	Dead	1	Euphagus cyanocephalus	Euphagus	cyanocephalus	U	U	north	Front entrance	Tanea Tolbert	guest services	not cataloged	AMS014	F	A	100% oss				1625		0	0	0	0	1	0	0	0		1
2013-11-06	2013	11	fall	1632	Dead	1	Calypte anna	Calypte	anna	M		north	Front concourse	Ernest Parker (Guest Services)		not cataloged	CCO682	M	A	sex/age at prep entered 8/5/14, aged using Pyle 8/8/2014 LQK				1632		0	0	0	0	1	0	0	0		1
2012-10-03	2012	10	fall	435	Dead	1	Setophaga petechia	Setophaga	petechia	F		west	West Garden	Carl Lieber (Ground Services)		not cataloged	LCW576	U	U					1635		0	0	0	0	1	0	0	0		1
2011-10-27	2011	10	fall	1645	Dead	1	Euphagus cyanocephalus	Euphagus	cyanocephalus	M	U	north	Front entrance	Freeland Dunker	Hit live, then Freeland provided symptomatic treatment, no improvement, euthanized (carcass in AQ freezer as of Oct 28 2011)	not cataloged	SSB005	M	U					1645		0	0	0	0	1	0	0	0		1
2009-05-09	2009	5	spring	1700	Dead	1	Calypte anna	Calypte	anna	F		east	east garden	Security		96624	LCW275	M	HY	pickle; corr 70%; outer primary thin and curved	apparently stepped on and in bad condition			1700		0	0	0	0	0	1	0	0		1
2009-08-25	2009	8	summer	1700	Dead	1	Calypte anna	Calypte	anna	M	HY	east	east garden	Security		96918	PLG791	F	a		date corrected on 8/7/2014 changed from 8/29 to 8/25, aged 8/12/2014			1700		0	0	0	0	0	1	0	0		1
2008-10-14	2008	10	fall	1700	Dead	1	Euphagus cyanocephalus	Euphagus	cyanocephalus			wet	westside			not cataloged	CCO004	F	A		added by EJC using CCO prep notebook			1700		0	0	0	0	0	1	0	0		1
2008-10-14	2008	10	fall	1700	Dead	1	Euphagus cyanocephalus	Euphagus	cyanocephalus			west	westside			not cataloged	KJO004	F	U					1700		0	0	0	0	0	1	0	0		1
2008-10-14	2008	10	fall	1700	Dead	1	Euphagus cyanocephalus	Euphagus	cyanocephalus			west	westside			not cataloged	PJY004	M	HY					1700		0	0	0	0	0	1	0	0		1
2008-10-14	2008	10	fall	1700	Dead	1	Euphagus cyanocephalus	Euphagus	cyanocephalus			west	westside			not cataloged	RJH004	M	HY					1700		0	0	0	0	0	1	0	0		1
2012-09-20	2012	9	fall	1704	Dead	1	Calypte anna	Calypte	anna	M	IMM	north	Front door	Ernest Parker		not cataloged	CCO490	M	HY					1704		0	0	0	0	0	1	0	0		1
2010-08-18	2010	8	summer	1710	Dead	1	Calypte anna	Calypte	anna	U	U	east	East garden	Eric Thomas		not cataloged	CCO058	M	HY		aged by plumage 8/8/2014			1710		0	0	0	0	0	1	0	0		1
2012-08-02	2012	8	summer	525	Dead	1	Calypte anna	Calypte	anna			west	West Garden	Ernest Parker		not cataloged	CCO492	F	HY					1725		0	0	0	0	0	1	0	0		1
2010-09-28	2010	9	fall	1730	Dead	1	Junco hyemalis	Junco	hyemalis	U	U	east	East garden	AQ Swing Shift		not cataloged	NAM032	M	U					1730		0	0	0	0	0	1	0	0		1
2011-07-20	2011	7	summer	1730	Dead	1	Selasphorus sasin	Selasphorus	sasin	F?	HY	north	Front member door	R. Ronconi / M. Ramos		not cataloged	CCO222	F	HY		CCO claims F by plumage, look at skin. Sex confirmed by LQK			1730		0	0	0	0	0	1	0	0		1
2012-09-13	2012	9	fall	1730	Dead	1	Setophaga petechia	Setophaga	petechia	F	?	B2	B2West outside Entomology	Stan Blum		not cataloged	JW016	U	U					1730		0	0	0	0	0	1	0	0		1
2008-06-18	2008	6	summer	1730	Dead	1	Calypte anna	Calypte	anna	Male	HY	east	eastside			97092	PLG746	F	HY		prep/age/sex added 8/7/2014			1730		0	0	0	0	0	1	0	0		1
2013-05-20	2013	5	spring	1736	Dead	1	Carpodacus mexicanus	Carpodacus	mexicanus	U	U	west	West garden	Rob Ronconi, Rey Ramos	Either F or HY bird	not cataloged	LCW703	U	HY					1736		0	0	0	0	0	1	0	0		1
2009-04-16	2009	4	spring	1740	Dead	1	Calypte anna	Calypte	anna	U	JUV	Staff entrance	southside	Beth Goldstein		97127	PLG774	F	A		Aged 8/12/2014			1740		0	0	0	0	0	1	0	0		1
2013-03-25	2013	3	spring	1745	Dead	1	Carpodacus mexicanus	Carpodacus	mexicanus	F	AHY	Staff entrance	Staff Entrance	Jens Vindum		not cataloged	MK1164	F	A	date wrong in spreadsheet, corrected 8/5/2014				1745		0	0	0	0	0	1	0	0		1
2009-05-11	2009	5	spring	1745	Dead	1	Junco hyemalis	Junco	hyemalis	U	HY	B2	southside office windows	MEF	skin 5/29/09 JMR	not cataloged	JMR991	M	HY	10% oss				1745		0	0	0	0	0	1	0	0		1
2009-04-05	2009	4	spring	1818	Dead	1	Selasphorus rufus	Selasphorus	rufus	F		west	west garden	Robby Maccam - security	skin 8/12/09 PLG 780	96924	PLG780	F	A		found on Moe's desk at 1818. Exact time unknown, aged 8/12/2014			1818		0	0	0	0	0	1	0	0		1
2013-06-28	2013	6	summer	1830	Dead	1	Euphagus cyanocephalus	Euphagus	cyanocephalus	U	HY?	north	Main Lobby	Ricardo Guido		not cataloged	LCW730	F	HY	sex/age at prep entered 8/5/14				1830		0	0	0	0	0	1	0	0		1
2010-08-23	2010	8	summer	2020	Dead	1	Zenaida macroura	Zenaida	macroura	U	U	north	front entrance	Rachel Tom	best for skeleton	97384	RJH029	F	U					2020		0	0	0	0	0	0	1	0		1
2013-08-06	2013	8	summer	2330	Dead	1	Calypte anna	Calypte	anna	U	U	north	front entrance	Rob Ronconi	Rob picked up the carcass on his way home, waiting for him to bring it back in to CAS (8/7) 8/12 Rob confirmed that carcass is no longer in his freezer			U	U	emailed Rob Ronconi to bring in specimen				2330		0	0	0	0	0	0	0	0		0
2009-09-05	2009	9	fall	before 800	Dead	1	Zenaida macroura	Zenaida	macroura	U	U	???	?	?	skin 09/06/09 PLG	96925	PLG798	M	U	90% oss	Left at business reception.					37	49	41	38	26	19	1	0
2010-04-09	2010	4	spring	unknown	Dead	1	Calypte anna	Calypte	anna	M	HY	east	east garden	A. Perez	left in freezer - aged HY by grooves in bill and male by few gorget feathers; PJY036 pickled 10/28/2010	96756	PJY036	M	HY		Fixed and stored in Ethanol, age determination by plumage, sex determinations conflicting between MEF and PJY. MEF determined age by grooves in bill, presumed male due to few gorget feathers. PJY assumed female due to plumage.
2010-10-06	2010	10	fall	no time recorded	Dead	1	Passerella iliaca	Passerella	iliaca	U	U	west	West Garden	Aldo Figueroa	(Security)	not cataloged	MHM051	U	U
2010-02-07	2010	2	winter		Dead	1	Turdus migratorius	Turdus	migratorius	U	U	east	eastside	Alex You		not cataloged	ASG175	M	A
2009-01-16	2009	1	winter		Dead	1	Calypte anna	Calypte	anna	west	westside	west	westside	Alex Yow		not cataloged	IGK015	M	A		EJC listed as IGK013 and IGK016; MEF corrected based on Accession file 8/7/14, added west side as location
2009-01-16	2009	1	winter		Dead	1	Calypte anna	Calypte	anna	M	AD	west	westside	Alex Yow		not cataloged	IGK016	M	A		EJC listed as IGK013 and IGK016; MEF corrected based on Accession file 8/7/14
2011-10-30	2011	10	fall	AM	Dead	1	Calypte anna	Calypte	anna	M	U	Staff entrance	staff entrance	Anne Reid		not cataloged	LCW350	M	A
2010-05-22	2010	5	spring		Dead	1	Catharus ustulatus	Catharus	ustulatus	U	U	B2	soutside, B2West	Anthea Carmichael	Norm and Meghan noticed bird on 5/22, Anthea picked it up on 5/24	not cataloged	ASG204	U	A		aged by plumage 8/8/2015
2009-11-03	2009	11	fall		Dead	1	Catharus guttatus	Catharus	guttatus	U	U	west	West Garden	Beatriz Zaldivar		not cataloged	ASG159	F	U
2010-09-07	2010	9	fall		dead	1	Wilsonia pusilla	Cardellina	pusilla			Staff entrance	staff entrance	Brenda Melton		not cataloged	MHM050	M	U		added by EJC using MHM prep notebook
2009-07-04	2009	7	summer		Dead	1	Euphagus cyanocephalus	Euphagus	cyanocephalus	F	AHY	west	west garden	C. Kang security		not cataloged	RJH019	U	HY		Age determined by LCW 12/10
2013-11-30	2013	11	fall	?	Dead	1	Calypte anna	Calypte	anna	F?	U	Staff entrance	Business entrance	CAS staff		not cataloged	CCO680	F	A	sex/age at prep entered 8/5/14
2009-07-19	2009	7	summer	<0900	Dead	1	Calypte anna	Calypte	anna	F	AHY	west	westside	CAS staff	skin 7/19/09 PLG 754	97102	PGL754	F	A		found in Moe's freezer 0900 already frozen, aged 8/12/2014
2009-01-30	2009	1	winter		Dead	1	Calypte anna	Calypte	anna	M	AD	east	eastside	Chuck Castorino		96915	PLG778	M	A
2009-01-30	2009	1	winter		Dead	1	Calypte anna	Calypte	anna	M	AD	east	eastside	Chuck Castorino		96916	PLG779	M	A
2013-05-27	2013	5	spring	unknown	Dead	1	Junco hyemalis	Junco	hyemalis	M	AHY	B2	southside	Codie Otte	not entered in orginal spreadsheet	not cataloged	MK1167	U	HY	not entered in original spreadsheet
2010-08-15	2010	8	summer		Dead	1	Calypte anna	Calypte	anna	M?	HY?	west	westside	Custodial services	PJY034 pickled 10/28/10	96754	PJY034	M	U
2012-02-06	2012	2	winter	unknown	Dead	1	Setophaga coronata	Setophaga	coronata	U	U	???	unknown	custodial?	No data, Found in freezer on Moe's desk on 2/6 likely hit 2/4 or 2/5	not cataloged	LCW426	M	A
2009-04-19	2009	4	spring	late AM	Dead	1	Unknown	Unknown				north	frontside (northside)	custodians				U	U		"very small yellow bird" found by custodians and mistakenly thrown out
2009-03-02	2009	3	spring		Dead	1	Calypte anna	Calypte	anna	M	AD	east	eastside	Eric		97000	PLG766	M	A
2010-10-08	2010	10	fall	no time recorded	Dead	1	Calypte anna	Calypte	anna	U	HY	east	East garden	Eric Bolich	(Security); ASG347 pickled 7/7/2011	96750	ASG347	F	U		MEF thought bird to be HY, ASG claimed it as adult F. try to find skin to check age 8/8/2014
2010-09-06	2010	9	fall		Dead	1	Geothlypis trichas	Geothlypis	trichas	M	HY	west	West Garden	Eric Bolich		not cataloged	ASG227	M	HY
2009-02-23	2009	2	winter		Dead	1	Calypte anna	Calypte	anna	F?	AD?	east	east garden	Gerber Ramirez		97132	ASG121	F	A
2010-04-04	2010	4	spring	unknown	Dead	1	Euphagus cyanocephalus	Euphagus	cyanocephalus	U	IMM	north	north side (main enterance)	Hershow Albarazi	MHM skinned 4/6/10	not cataloged	MHM037	F	A		aged by plumage 8/8/2014
2008-10-22	2008	10	fall		Dead	1	Passerella iliaca	Passerella	iliaca			north	frontside	Jay (guest services)		not cataloged	MK1071	F	U
2009-10-13	2009	10	fall	after 855	Dead	1	Selasphorus sasin	Selasphorus	sasin	U	U	east	East Garden	Jose Barillas (Security)		96622	LCW273	M	HY	pickle; corr. 50%; very thin outer rec with white tip
2010-06-29	2010	6	summer		Dead	1	Calypte anna	Calypte	anna	M	HY	east	East garden	Juan W. (Security?)	No time recorded	not cataloged	MB032	M	HY		aged by plumage 8/8/2014
2009-12-07	2009	12	winter		Dead	1	Calypte anna	Calypte	anna	M	Adult	west	west garden	K. Esquerra		not cataloged	ASG163	M	A		no time recorded - must have been afternoon
2010-04-13	2010	4	spring	unknown	Dead	1	Selasphorus sasin	Selasphorus	sasin	U	U	west	westside	Kary Zaldivar		not cataloged	CCO308	U	U
2009-11-03	2009	11	fall		Dead	1	Calypte anna	Calypte	anna	M	HY	west	West Garden	Kery Chang		not cataloged	ASG157	M	HY
2009-08-14	2009	8	summer		dead	1	Calypte anna	Calypte	anna			???		Kyle (CAS security)		not cataloged	ASG230	M	HY	added by EJC using ASG catalog
2009-12-08	2009	12	winter		Dead	1	Calypte anna	Calypte	anna	F	HY	east	east garden	Luis Campos - Security		not cataloged	PLG860	F	U
2009-11-08	2009	11	fall		Dead	1	Sayornis nigricans	Sayornis	nigricans	U	U	east	east garden	M. Chaney		not cataloged	MK1098	M	U	100% oss
2009-01-04	2009	1	winter		Dead	1	Calypte anna	Calypte	anna			???		MEF		97128	PLG775	M	A
2009-01-04	2009	1	winter		Dead	1	Calypte anna	Calypte	anna			???		MEF		96914	PLG776	M	A
2009-10-14	2009	10	fall	before 850	Dead	1	Setophaga coronata	Setophaga	coronata	F	Adult	east	East Earden	N. Estival (Security)				F	A
2009-12-02	2009	12	winter		Dead	1	Calypte anna	Calypte	anna	M	HY	east	east garden	N. Estival (Security)		not cataloged	PLG851	M	HY		Aged by plumage 8/8/2014
2009-10-10	2009	10	fall		Dead	1	Setophaga coronata	Setophaga	coronata			???		N. Estival (Security)		not cataloged	ASG158	M	U
2009-11-22	2009	11	fall		Dead	1	Catharus guttatus	Catharus	guttatus	U	U	west	westside	N. Estival (Security)		not cataloged	PLG843	F	HY		aged based on buffy coverts, 8/8/2014
2008-10-25	2008	10	fall		dead	1	Calypte anna	Calypte	anna			east	east garden	N. Perez		not cataloged	IGK009	M	A		added by EJC using IGK prep notebook
2010-11-04	2010	11	fall	before 1100	Dead	1	Melospiza lincolnii	Melospiza	lincolnii	U	U	east	East Garden	N/A		not cataloged	CEC032	M	HY		aged by plumage on 8/8/2014
2010-07-17	2010	7	summer		Dead	1	Selasphorus sasin	Selasphorus	sasin	U	HY	north	front entrance	Rachel Smith	Guest Services; PJY038 pickled 10/28/2010	96758	PJY038	U	HY
2009-07-19	2009	7	summer	PM	Dead	1	Calypte anna	Calypte	anna	M	HY	east	east garden	Reddix		96998	PLG762	M	HY		Aged 8/12/2014
2009-01-07	2009	1	winter		Dead	1	Calypte anna	Calypte	anna	M	AD	east	east garden	reported to guards		97126	PLG772	M	A
2009-08-06	2009	8	summer	before 1045	Dead	1	Vireo gilvus	Vireo	gilvus	U	HY	east	east garden	security	skin 8/8/09 PLG	96911	PLG777	M	HY
2009-08-06	2009	8	summer		Dead	1	Selasphorus sasin	Selasphorus	sasin	U	HY	east	east garden	security	skin 8/8/09 PLG	96923	PLG773	M	HY	added in using PLG's catalog	Aged 8/12/2014
2010-09-10	2010	9	fall		Dead	1	Selasphorus sasin	Selasphorus	sasin	U	HY	east	East Garden	Security		not cataloged	ASG231	M	HY
2009-07-06	2009	7	summer		Dead	1	Euphagus cyanocephalus	Euphagus	cyanocephalus	F	AHY	east	east garden	Security		not cataloged	ASG117	M	HY
2009-11-24	2009	11	fall		Dead	1	Catharus guttatus	Catharus	guttatus	U	U	west	west garden	Security		not cataloged	PLG845	F	U
2010-08-21	2010	8	summer		Dead	1	Setophaga townsendi	Setophaga	townsendi	U	U	east	East garden	Security?	in Moe's freezer on Monday morning	not cataloged	MK1122	M	HY		aged by plumage 8/8/2014
2009-10-19	2009	10	fall		Dead	1	Melospiza melodia	Melospiza	melodia	U	U	west	west garden	Tina Liang		not cataloged	MHM026	M	U
2008-03-12	2008	3	spring		dead	1	Zonotrichia atricapilla	Zonotrichia	atricapilla			east	eastside	unknown		97344	JMR965	M	A		added by EJC using JMR prep notebook;no date originally but collection date found in accession file, aged by plumage 8/8/2014; 9/16/13--addendum--age corrected to AHY due to season. DEJU is the only passerine to concievably nest this early; this bird was presumably an immature rather than a juvenile
2010-07-08	2010	7	summer		Dead	1	Carpodacus mexicanus	Carpodacus	mexicanus	U	HY	???	unknown	unknown	showed up in Moe'd freezer 7/8 afternoon - no data tag	not cataloged	ASG219	M	HY
2011-11-15	2011	11	fall	??	Dead	1	Calypte anna	Calypte	anna	M	U	???	Unknown	Unknown (custodial?)	Moe came back after 4 days away and found a dead hummingbird in a black garbage bag just left on her desk. No data included. Likely from custodial.	96657	LCW395	M	A
2013-05-27	2013	5	spring	unknown	Dead	1	Selasphorus sasin	Selasphorus	sasin	M	AHY	north	front entrance	unknown (FD written on bag)		not cataloged	LCW723	M	A	sex/age at prep entered 8/5/14
2012-12-21	2012	12	winter	unknown	dead	1	Setophaga coronata	Setophaga	coronata			west	west garden	Vikki McCloskey		not cataloged	CCO404	M	U
2009-12-01	2009	12	winter		Dead	1	Calypte anna	Calypte	anna	F	HY	west	west garden	W. Campos		not cataloged	PLG852	F	U
2008-06-13	2008	6	summer	1902-10-26	Dead	1	Junco hyemalis	Junco	hyemalis	?	HY	east	eastside			97099	PLG603	M	HY
2008-03-31	2008	3	spring		Dead	1	Selasphorus sasin	Selasphorus	sasin			B2	southeast doors			96625	LCW276	F	A	pickle	added in using LCW's catalog; SY
2008-03-31	2008	3	spring		Dead	1	Selasphorus sasin	Selasphorus	sasin			B2	southeast doors			96626	LCW277	M	A	pickle; corr. ~20%; thin outer rects with white tips; obvious notch on r2	added in using LCW's catalog; SY
2008-04-07	2008	4	spring		Dead	1	Selasphorus sasin	Selasphorus	sasin			north				96616	LCW264	M	A	pickle	added in using LCW's catalog; SY
2008-04-09	2008	4	spring		Dead	1	Calypte anna	Calypte	anna			east	eastside			97095	PLG751	F	HY		added in using PLG's catalog; aged 8/12/2014
2008-04-09	2008	4	spring		Dead	1	Calypte anna	Calypte	anna			east	eastside			97096	PLG752	M	A		added in using PLG's catalog
2008-04-21	2008	4	spring		Dead	1	Calypte anna	Calypte	anna			east	eastside			96677	CCO145	U	U	pickle	added in using CCO's catalog
2008-04-21	2008	4	spring		Dead	1	Calypte anna	Calypte	anna			east	eastside			96928	PLG781	M	A		added by EJC using online catalog & PLG's notebook
2008-05-05	2008	5	spring		Dead	1	Selasphorus sasin	Selasphorus	sasin			east	eastside			97094	PLG750	M	HY		added in using PLG's catalog
2008-07-06	2008	7	summer		Dead	1	Selasphorus sasin	Selasphorus	sasin	F?	HY	east	eastside			96618	LCW266	M	HY	pickle; short bill; corr. 75%; very thin outer rect with white tip
2008-07-14	2008	7	summer		Dead	1	Calypte anna	Calypte	anna			Staff entrance	southside			96627	LCW278	M	A	pickle; irridescent feathers on throat and forehead
2008-07-15	2008	7	summer		Dead	1	Selasphorus sasin	Selasphorus	sasin	Male	HY	west	westside			96620	LCW268	M	HY	pickle; short bill; corr. 25%; very thin outer rect with white tip
2008-07-22	2008	7	summer		Dead	1	Selasphorus sasin	Selasphorus	sasin	U	U	west	westside			96629	LCW280	M	HY	pickle; short bill; corr. 30%; very thin outer rec with white tip
2008-07-24	2008	7	summer		Dead	1	Calypte anna	Calypte	anna			Staff entrance	southside			96932	PLG793	M	HY		Added according to PLG's catalog; potentially the same bird as the other Calypte anna from this date, which was entered as alive, but all other information matches this bird
2008-07-31	2008	7	summer		Dead	1	Calypte anna	Calypte	anna	Male	HY	???				96630	LCW281	M	HY
2008-08-25	2008	8	summer		Dead	1	Calypte anna	Calypte	anna	Male	HY	Staff entrance	southside			96931	PLG792	M	HY		Added according to PLG's catalog
2008-08-26	2008	8	summer		Dead	1	Calypte anna	Calypte	anna			Staff entrance	southside			96631	LCW282	U	U
2008-08-30	2008	8	summer		Dead	1	Calypte anna	Calypte	anna	female	HY	east	eastside					F	HY
2008-08-31	2008	8	summer		Dead	1	Selasphorus rufus	Selasphorus	rufus	male	HY	north	northside			96930	PLG789	M	HY		initially identified in spreadshhet as Selasphorus sasin, but Peter's notebook says Selasphorus rufus; check collection
2008-09-01	2008	9	fall		Dead	1	Calypte anna	Calypte	anna	Male	HY	west	westside			not cataloged	JMR1012	M	HY
2008-09-02	2008	9	fall		Dead	1	Calypte anna	Calypte	anna	male	HY	west	westside			96621	LCW269	M	HY
2008-09-02	2008	9	fall		Dead	1	Selasphorus rufus	Selasphorus	rufus	female	HY	east	eastside			96927	PLG748	F	HY		Aged 8/12/2014
2008-09-05	2008	9	fall		Dead	1	Selasphorus rufus	Selasphorus	rufus		HY	east	eastside			96619	LCW267	F	HY	pickle; corr. 15%; outer rec medium width; r1 green at tip with rufous base
2008-10-23	2008	10	fall		Dead	1	Calypte anna	Calypte	anna			???	no data with specimen, found on my desk 10/24 (I was out 10/23)			97090	PLG741	F	A		Aged 8/12/2014
2008-10-25	2008	10	fall		Dead	1	Calypte anna	Calypte	anna			west	west			97105	PLG610	M	A		Aged and sexed 8/12/2014
2008-11-04	2008	11	fall		Dead	1	Calypte anna	Calypte	anna	male		Staff entrance	southside			96929	PLG782	M	A
2008-11-21	2008	11	fall		Dead	1	Calypte anna	Calypte	anna	male		west	westside			96926	PLG608	M	A
2008-02-10	2008	2	winter		dead	1	Turdus migratorius	Turdus	migratorius			east	east entrance			96018	NM001	M	A	skeleton	added by EJC using NM prep notebook; acc. # not windowkill but data matches CAS
2008-07-13	2008	7	summer		Dead	1	Melospiza melodia	Melospiza	melodia			???	ask Alex			97341	MEF535	F	HY	age/sex data entered from prep notes 8/8/2014
2008-08-08	2008	8	summer		Dead	1	Junco hyemalis	Junco	hyemalis	U	HY	east	eastside			97098	PLG602	M	HY
2008-09-29	2008	9	fall		Dead	1	Vermivora celata	Vermivora	celata			???				96628	LCW279	F	U	pickle; tail 43.9 mm; orange on crown 5.5mm
2008-10-08	2008	10	fall		Dead	1	Passerella iliaca	Passerella	iliaca		HY	west	westside			97152	ASG065	F	U
2008-10-08	2008	10	fall		Dead	1	Catharus guttatus	Catharus	guttatus		HY	east	eastside			97146	ASG066	F	U
2008-10-11	2008	10	fall		Dead	1	Passerculus sandwichensis	Passerculus	sandwichensis		HY	west	westside			not cataloged	MK1061	M	HY	25% oss
2008-10-12	2008	10	fall		Dead	1	Geothlypis trichas	Geothlypis	trichas		HY	east	eastside			not cataloged	MK1060	F	HY	25% oss
2008-10-13	2008	10	fall		Dead	1	Passerculus sandwichensis	Passerculus	sandwichensis		HY	north	front side			97100	PLG604	M	U
2008-10-15	2008	10	fall		Dead	1	Setophaga townsendi	Setophaga	townsendi		HY	B2	southside			not cataloged	MK1106	U	U
2008-10-25	2008	10	fall		Dead	1	Junco hyemalis	Junco	hyemalis		HY	west	westside			97097	PLG601	U	HY
2008-11-18	2008	11	fall		Dead	1	Catharus guttatus	Catharus	guttatus			Staff entrance	south door			not cataloged	MK1072	M	U		added by EJC using MK prep notebook; not window kill acc. # but location is CAS window kill, 498 tray 8
																		184
																		93
																		31
																		1.97849
